## **An interplay between cellular growth and atypical fusion defines morphogenesis of a modular glial niche**

Maria Alexandra Rujano<sup>1</sup>, David Briand<sup>1</sup>, Bojana Đelić<sup>1,2</sup> and Pauline Spéder<sup>1,\*</sup>

1. Institut Pasteur, Brain plasticity in response to the environment, CNRS, UMR3738, Paris, France.
2. Present address: Institut de Biologie de l'École Normale Supérieure (IBENS), Cell Division and Neurogenesis, École Normale Supérieure, CNRS, Inserm, PSL Université Paris, Paris, France

### **\*Corresponding author:**

Pauline Spéder, PhD

Department of Developmental and Stem Cell Biology

*Brain plasticity in response to the environment* Group

Institut Pasteur/CNRS UMR3738

25 rue du Docteur Roux

75015 PARIS

E-mail : [pauline.speder@pasteur.fr](mailto:pauline.speder@pasteur.fr)

Phone: + 33 1 45 68 89 78.

1 **Abstract**

2 Neural stem cells (NSCs) are embedded in a multi-layered, intricate cellular  
3 microenvironment supporting their activity, the niche. Whilst shape and function are  
4 inseparable, the morphogenetic aspects of niche development are poorly understood. Here,  
5 we use the formation of the glial network of a NSC niche to investigate acquisition of  
6 architectural complexity. Cortex glia (CG) in *Drosophila* regulate neurogenesis and build a  
7 reticular structure around NSCs. We first show that individual CG cells grow tremendously  
8 to ensheath several NSC lineages, eventually spanning the entire tissue while partitioning  
9 the NSC population. Elaborate proliferative mechanisms convert these cells into syncytia  
10 rich in cytoplasmic bridges. Unexpectedly, CG syncytia further undergo homotypic cell-cell  
11 fusion, relying on defined molecular players of cell fusion such as cell surface receptors and  
12 actin regulators. Exchange of cellular components is however dynamic in space and time, a  
13 previously unreported unique mechanism. This atypical cell fusion remodels cellular  
14 borders, restructuring the CG syncytia. Ultimately, the coordination of growth and fusion  
15 builds the multi-level architecture of the niche, and creates a modular, spatial partition of the  
16 NSC population. Our findings provide novel insights into how a niche forms and organises  
17 while developing intimate contacts with a stem cell population.

## 1 **Introduction**

2 Across tissues and organisms, the niche is a tailored cellular environment which/that  
3 regulates and supports stem cell behaviour by providing a structural (cell contacts and tissue  
4 topology) and signalling (biochemical cues) scaffold<sup>1</sup>. Despite this prominent role  
5 indissociable from stem cell activity, and hence tissue formation and homeostasis, niche  
6 cells remain poorly understood. This is particularly the case in the nervous system, where  
7 neural stem cells (NSCs) self-renew while generating new cells during neurogenesis. The  
8 NSC niche is highly complex and heterogeneous, with a diversity of cell types and  
9 interactions<sup>2-4</sup> that provide extrinsic cues regulating NSC behaviour<sup>5-8</sup>. In mammals,  
10 neurogenic niches comprise multiple cell populations including glial cells, neurons, resident  
11 immune cells and blood vessels forming the blood-brain barrier, as well as acellular  
12 components<sup>9-11</sup>. The NSC niche exhibits intricate, tight cellular arrangements, such as  
13 astrocytic extensions packed in between and contacting NSCs and blood vessels<sup>9,11</sup>. Direct  
14 couplings also exist between several cell types, including between and within progenitor and  
15 glia populations, creating complex cellular networks sharing signals<sup>12,13</sup>. The NSC niche  
16 ultimately forms a functional and physical unit with specific cellular and molecular properties  
17 providing cell-cell, paracrine and systemic signals<sup>4,14</sup>. The niche starts to form very early  
18 during embryogenesis and becomes progressively more elaborate with the progression of  
19 neurogenesis and the acquisition of tissue complexity<sup>11,15</sup>. Niche composition and structure  
20 must therefore be very dynamic in order to accommodate the substantial tissue remodelling  
21 which results from neurogenesis throughout life. However, still little is known about the  
22 cellular processes involved and the supporting mechanisms happening in the niche.

23 In particular, we still have scarce understanding on how niche structure is established from  
24 individual cells, and how it acquires its 3D organization. Answering these questions requires  
25 being able to identify, track and manipulate independently niche cell populations *in vivo*,  
26 within their physiological context, conditions that the complexity of the mammalian brain  
27 makes challenging to achieve. First, the mammalian NSC niche has a highly heterogeneous  
28 cellular composition and architecture. In addition, mammalian models have complex  
29 genetics and the existence of multiple, parallel and tractable systems are rare. Finally, while  
30 *in vivo* models are crucial to acquire an accurate spatial and temporal picture of the cellular  
31 dynamics taking place within a 3D niche, access to a whole living brain in mammals is still  
32 difficult. To overcome these issues while offering a system allowing the investigation of core,  
33 conserved cellular and molecular mechanisms supporting NSC niche formation, we use the  
34 developing larval *Drosophila* brain as a model system.

35 *Drosophila* NSCs (historically called neuroblasts) are specified during embryogenesis and  
36 start proliferating to generate the neurons and glia that will form the larval CNS<sup>16–18</sup>. When  
37 these primary lineages are completed, embryonic NSCs exit the cell cycle and enter a  
38 quiescent state. Subsequently, during larval development, NSCs are woken up from this  
39 dormant phase<sup>19</sup> by a feeding-induced nutritional signal, leading them to enlarge, re-enter  
40 the cell cycle and resume proliferation<sup>20–23</sup>. This second wave of neurogenesis lasts until the  
41 end of larval life, generating secondary lineages which will make up most of the adult CNS.  
42 Proliferating larval NSCs reside in a neurogenic niche which comprises common players,  
43 with related functions, to the mammalian niche –namely glial cells, a blood-brain barrier, and  
44 neurons (Figure 1a). The blood-brain barrier is essential to neurogenesis by relaying the  
45 systemic nutritional cues that will trigger NSC reactivation<sup>22,24</sup>. Beneath the blood-brain  
46 barrier lie the cortex glia (CG). CG display a striking structure around actively cycling NSCs,  
47 individually encasing them and their newborn progeny within membranous chambers while  
48 forming a network spanning the whole CNS (Fig. 1a-c)<sup>25–27</sup>. CG perform genuine niche  
49 functions. They protect NSCs against oxidative stress and nutritional restriction<sup>28,29</sup>, support  
50 NSC cycling<sup>30,31</sup> and are essential for neuronal positioning and survival<sup>125,27,30,32,33</sup>.  
51 Importantly, CG network and NSC encasing are not present at the beginning of larval life,  
52 when NSCs are quiescent. Previous studies have shown that this network forms  
53 progressively in response to both nutritional cues and signals from NSCs, pinpointing an  
54 exquisite coordination between neurogenic needs, systemic cues and niche  
55 morphogenesis<sup>27,34</sup>.

56 Here, we used CG network morphogenesis to study niche formation and acquisition of  
57 architectural complexity. We showed that growth of individual CG cells coupled with  
58 elaborate proliferative strategies create a network of contiguous glial syncytia that ensheath  
59 subsets of NSCs. Notably, CG territories can be reshaped by an atypical cell-cell fusion  
60 mechanism, which is highly dynamic in time and space. Both CG growth and homotypic  
61 fusion are required for correct network architecture. Ultimately, we identified a niche  
62 organised in architectural units creating a spatial, modular division of the NSC population.  
63 These partitions can be remodelled by CG fusion events, resulting in a changing map of CG  
64 cells and as such NSC subsets. Importantly, the CG structure, made of connected cells  
65 capable of sharing information, and organized in spatial territories, is reminiscent of the  
66 astrocytic networks present throughout the mammalian brain<sup>35</sup>. Our findings provide a novel  
67 framework to understand how complex reticular structures are formed, as well as a tractable  
68 model to decipher the impact of niche structure on NSC functions and their organisation as  
69 a population.

## 1 **Results**

### 2 **Growth of individual CG cells results in a tiled organization of the cortex glia network**

3 We first sought to visualise the spatiotemporal dynamics of CG network morphogenesis  
4 during neurogenesis in the larval CNS. For this, we used either the protein trap Nrv2::GFP  
5 that labels CG membranes, or expression of membrane targeted GFP (mCD8::GFP) driven  
6 by *cyp4g15-GAL4* (expressed mostly in CG as well as in some astrocyte-like glia, readily  
7 identifiable based on morphology and dorsal compartmentalisation, see Supp. Fig S1a). In  
8 accordance with CG chambers being progressively formed in parallel with NSC  
9 reactivation<sup>27</sup>, the CG network starts as a loose, gaping meshwork at ALH0 (ALH: after larval  
10 hatching) that progress to a highly interconnected reticular network around ALH48, when it  
11 encloses each individual NSCs (Figure 1c-d, shown in the CNS region of the ventral nerve  
12 cord, VNC). Eventually, the CG network spans the entire tissue at ALH96. Network growth  
13 and acquisition of complexity is associated with dramatic changes in the size and  
14 morphology of CG cells, that extend their membranes to gradually accommodate the  
15 growing NSC lineages (Figure 1d). Remarkably, the resulting intricate network efficiently  
16 maintains the spatial individualities of each NSC lineage.

17 Next, we determined the contribution of each individual CG cell to network formation and  
18 NSC encapsulation. We expressed in CG the multicolour lineage tracing tool Raepli<sup>36</sup>, that  
19 contains one single copy of membrane targeted Raepli (Raepli-CAAX) and can be  
20 induced at the desired time upon Flippase (FLP) recombination (Supp. Fig S1b). Its  
21 induction just After Larval Hatching (ALH0-2) resulted in the expression of exclusively one  
22 of four different colours in the CG cells. Clones extended from ALH0 to ALH96, spanning  
23 the whole tissue and forming clear boundaries between them, ultimately tiling the entire  
24 brain (Figure 1e). A similar tiled organisation was observed previously, using stochastic  
25 expression of two fluorophores, around mature neurons<sup>32</sup>. Quantifying the volume of  
26 individual clones over time (Figure 1f) revealed a steady growth of single colour clones from  
27 ALH0 to ALH96, with the most significant increase between ALH72 and ALH96 in  
28 concomitance with NSC lineage expansion. Remarkably, we also observed that each single  
29 CG clone (derived from one single CG cell) can encase several NSC lineages (Figure 1g),  
30 ranging from 5 NSCs per clone at ALH48 to an average of 10 NSCs per clone at ALH72  
31 (Figure 1h). All together these results show that CG are able to grow until entirely tiling the  
32 brain while precisely encapsulating several NSC lineages.

33

## 34 **CG cells exhibit multiple cell cycle strategies**

35 We then asked about the cellular mechanisms at play to support such extensive clonal  
36 growth. Two powerful, rather opposite strategies can fuel the generation of large clones.  
37 Mitosis results in both cellular and nuclear divisions and thus leads to increased cell  
38 numbers. On the other hand, endoreplication results in increased DNA content (i.e.,  
39 polyploidization) without cellular division, and results in larger cell size<sup>37–39</sup>.

40 CG proliferation had been reported previously based on nuclei counts, in clones or in specific  
41 CNS region<sup>26,32,40</sup>. However, the cell cycle mechanisms supporting such proliferation, as  
42 well as the resulting cellular organization remained debated. While increased nuclei  
43 numbers suggested mitotic events, there were also evidence fitting endoreplicative  
44 processes, such as replication without increase in nuclei numbers detected at very early  
45 stages (ALH0-24)<sup>34</sup>. We thus decided to do a thorough examination of the cell cycle in CG.  
46 We first confirmed that CG nuclei numbers in the entire CNS largely increase between  
47 ALH48 and ALH96, suggesting that proliferation is enhanced when NSC lineages are  
48 expanding (Supp. Fig. S1c-d). To determine the contribution of the individual CG cells  
49 present at ALH0 to this increase, we induced Raeppli-CAAX clones at ALH0 and stained for  
50 the pan-glial marker Repo (Supp. Fig. S1e). Counting the number of Repo<sup>+</sup> nuclei in each  
51 CG clone revealed a fivefold increase between ALH48 and ALH96 (Supp. Fig. S1f), in  
52 accordance with whole CNS count.

53 We then used the genetic tool Fly-FUCCI that allows to discriminate between G1, S and  
54 G2/M phases<sup>41</sup> to assess CG cell cycling activity along network formation, focusing on the  
55 VNC for simplicity (Fig. 2a-b). FUCCI relies on a combination of fluorescently-tagged  
56 degrons from Cyclin B and E2F1 proteins which are degraded by APC/C and CRL4<sup>CDT2</sup> from  
57 mid-mitosis and onset of S phase, respectively (Supp. Fig S2a). While CG nuclei appeared  
58 mostly in G1 at ALH0, we observed a progressive increase in the number of nuclei in S and  
59 G2/M between ALH24 and ALH72, followed by a sharp return to G1 at ALH96 (Fig. 2a-b), a  
60 temporal pattern reminiscent of the timing and level of NSC proliferation overtime. We also  
61 noticed that such change in cell cycle profile followed an antero-posterior pattern (compare  
62 ALH24 with ALH48 in Fig. 2a). This suggests that at least part of the CG population cycles  
63 between replicative and gap or mitotic phases, and that such cycling is spatially regulated  
64 and temporally coordinated with NSC behaviour.

65 To assess whether CG cells undergo proper mitosis, we checked *bona fide* mitotic  
66 hallmarks. We first stained CG cells with the mitotic marker phospho-histone H3 (PH3, Fig.  
67 2c-d) and detected PH3<sup>+</sup> CG cells between ALH24 and ALH72, fitting the FUCCI window  
68 with more CG cells in S or G2/M phases. Next, by performing live-imaging of RFP-tagged

69 histone (*Hist::RFP*) driven in CG on whole brain explants (see Methods), we were able to  
70 observe DNA condensation, metaphase alignment and chromosomes' segregation (Fig. 2e,  
71 Movie S1). Moreover, we observed nuclear envelope breakdown followed by reformation  
72 using *Lamin::GFP* expressed in CG (Supp. Fig. S2b, Movie S2). We also looked at the  
73 behaviour of the Drosophila homolog of anillin (*scraps*, *scra*), a conserved scaffolding  
74 protein involved in late stages of cytokinesis<sup>42</sup>. Anillin is found in the nucleus during  
75 interphase and relocates to the contractile ring during cytokinesis<sup>43</sup>. It then forms part of the  
76 midbody, a contractile ring-derived microtubule-rich proteinaceous structure assembled at  
77 the intercellular bridge between the two daughter cells at the end of mitosis and that marks  
78 the abscission site. Expressing RFP-tagged anillin in CG (*mRFP::scra*) uncovered midbody-  
79 like structures in between recently divided CG (Fig. 2f, identified by a decrease in nuclear-  
80 localised anillin compared to neighbouring CG nuclei) and along the CG membranes (Supp.  
81 Fig S2c). Quantifying anillin-positive midbody structures along time (Fig. 2g) revealed an  
82 increase between ALH48 and ALH96, paralleling Fucci and PH3 windows. All together,  
83 these data suggest that CG cells do undergo proper mitosis, including nuclear division and  
84 cytokinesis up to midbody formation.

85 Next, we sought to address whether endoreplication and subsequent polyploidization could  
86 also happen in CG. We assessed CG ploidy through DNA Fluorescence *In Situ* Hybridization  
87 (FISH) on chromosomes II and III (two out of the four Drosophila chromosomes<sup>44</sup>) in labelled  
88 CG nuclei along development (Figure 2h-i). We observed that at early stages, CG have a  
89 normal ploidy of 2n, which increases at ALH72 for part of the CG population, and decreases  
90 again to 2n at ALH96. Although we cannot exclude that part of this increase corresponds to  
91 catching DNA replication before mitosis (PH3<sup>+</sup> staining also peaks at ALH48-72, Fig. 2d),  
92 odd numbers as well as n>4 imply a contribution of polyploidization. Moreover, CG-specific  
93 downregulation of Dup (*double parked* gene), a DNA replication protein shown to be crucial  
94 for endoreplication<sup>45,46</sup>, caused a strong reduction in CG nuclei size and number (Figure 2j).  
95 Notably, endoreplication covers two cell cycle variants<sup>37,47</sup>. Endocycle alternate DNA  
96 replication (S-phase) with a gap (G) phase and do not show any mitotic features.  
97 Endomitosis includes S phase and some aspects of mitosis up to telophase<sup>48</sup>, but do not  
98 complete cellular division. By live-imaging on whole brain explants, we were able to observe  
99 endomitotic events, characterized by entry into mitosis followed by chromosomes  
100 segregation but absent later mitotic stages, instead with the DNA collapsing back into only  
101 one nucleus (Figure 2k, Movie S3). All together, these data show that polyploidization does  
102 occur in CG in a temporary fashion, in some cases through endomitosis.

## 103 **CG glia are syncytial units**

104 While CG displayed well-characterized marks covering different mitotic steps, we also  
105 noticed peculiar behaviours that indicated a subtler picture. First, using live-imaging, we  
106 noticed that mitoses often appeared synchronised between several nuclei (Fig. 3a, Movie  
107 S4). Similarly, using Fly-FUCCI, groups of neighbouring nuclei were found at the same cell  
108 cycle phase (Fig. 3b). Moreover, we observed that several close-by CG nuclei were  
109 undergoing cytokinesis at the same time, even sometimes seemingly linked by anillin  
110 cytoplasmic staining (Fig. 3b). Such coordinated behaviour between a group of CG nuclei  
111 suggest that they are receiving the same cell cycle cues. We thus wondered whether  
112 multiple CG nuclei could actually be sharing cytoplasmic material.

113 To test this, we relied on a Fluorescence Loss In Photobleaching (FLIP) technique, an  
114 approach used to examine the movement of molecules inside a cell and that can also serve  
115 to assess the continuity of a cellular compartment (reviewed in <sup>49,50</sup>). FLIP relies on the  
116 continuous bleaching of a small region of a fluorescently-labelled cell, while recording the  
117 entire zone whose continuity is being assessed. The continuous illumination will result not  
118 only in the bleach of the targeted region, but also will lead to the loss of fluorescence in any  
119 connected area, due to molecular diffusion. In contrast, non-connected areas will not be  
120 bleached. We expressed cytoplasmic GFP and RFP-tagged histone (*Hist::RFP*) in the entire  
121 CG population and imaged an area containing several CG nuclei. We then repetitively  
122 bleached GFP in a small region of the cytoplasm and recorded the loss of fluorescence with  
123 respect to CG nuclei. Strikingly, we were able to observe loss of fluorescence in large areas  
124 containing several CG nuclei (Fig. 3c and Supp. Fig. S3a), implying that indeed these CG  
125 nuclei are part of a continuous, connected cytoplasmic compartment. Quantifying FLIP  
126 experiments at different times revealed that the average number of connected CG nuclei  
127 increases twofold along CG network formation (Fig. 3d; average ALH24 = 3, versus average  
128 ALH96 = 7). These experiments show that CG cells are thus multinucleated.

129 Endomitosis could produce multinucleated cells in the rarer case they go through nuclear  
130 envelope breakdown and reformation. Nevertheless, a straightforward explanation to  
131 account for such an extent of multinucleation would be that CG undergo mitosis but fail to  
132 complete cytokinesis. The midbody is indeed a temporary structure formed between the two  
133 daughter cells during cytokinesis. While recent studies have shown that midbodies can be  
134 retained and have roles beyond cytokinetic events<sup>51</sup>, their main function is linked to  
135 abscission, after which their usual fate is to be cleaved and discarded. In some instances  
136 though, the midbody can be conserved at the site of cleavage to become a stable  
137 cytoplasmic bridge keeping the two daughter cells connected<sup>52,53</sup>. In this case, the midbody



138 grows and matures to become a ring-type structure (often coined ring canal) allowing  
139 exchange of large molecules.

140 Interestingly, counting anillin-enriched midbody structures along CG membranes revealed  
141 a steady increase in numbers over time, including up to the end of larval stage (Fig. 2g),  
142 what entails that they are not discarded but rather remain. This suggests that CG cells enter  
143 mitosis but at least in some cases, fail cytokinesis, staying connected by the midbody and  
144 related intercellular bridge. We then wondered whether other proteins known to associate  
145 with the midbody and ring canals were also present in puncta along CG membranes. We  
146 first found that a GFP fusion of ALIX, an ESCRT-associated scaffold protein required for  
147 abscission in the fly germline<sup>54</sup>, and endogenous Mucin-D, a mucin-type glycoprotein  
148 identified as a generic component of *Drosophila* intercellular bridges<sup>55</sup>, were co-localising  
149 with or adjacent to mRFP::scra puncta along CG membranes, respectively (Fig. 3e and  
150 Supp. Fig. S3b). In addition, Mucin-D puncta co-stained for a fluorescent fusion of the  
151 kinesin-like Pavarotti, an essential component of the contractile ring and derived structures<sup>56</sup>  
152 (Supp. Fig. S3c). Mucin-D and GFP::Pavarotti puncta exist independently of mScra::RFP  
153 expression, indicating that anillin overexpression does not induce their artificial recruitment.  
154 These data indicate that midbody-type structures containing multiple molecular components  
155 of midbody and stable intercellular bridge are present along CG membranes.

156 To demonstrate that CG cells stay connected through such structures, we first performed  
157 FLIP, expressing a cytoplasmic GFP together with mRFP::scra in all CG cells (Fig. S3d).  
158 We repetitively bleached GFP in a small cytoplasmic region next to an isolated Scra<sup>+</sup>  
159 punctum localised in a narrow cytoplasmic extension between CG nuclei. We found that the  
160 loss of fluorescence was able to propagate through the Scra<sup>+</sup> punctum, reaching CG nuclei  
161 localised on the other side. To fully demonstrate the existence as well as extent of such  
162 cytoplasmic connection, we then expressed in the CG, in combination with mRFP::scra, a  
163 photoconvertible protein (Kaede<sup>57</sup>), that irreversibly switches from GFP to RFP when excited  
164 by UV pulses. Excitation of a small CG zone led to the propagation of the converted form  
165 (herein named cKaede) in the whole plane, including through a Scra<sup>+</sup> punctum, ultimately  
166 covering the latter own fluorescence and reaching several CG nuclei (Fig. 3f). Z-imaging of  
167 the cKaede signal before and after localised photoconversion revealed a connected zone  
168 covering several nuclei and Scra<sup>+</sup> puncta (Fig. 3g and Movie S5). All together, these data  
169 show that CG cells are multinucleated and form syncytial compartments throughout which  
170 cytoplasmic proteins can shuttle, and which result in part from incomplete cytokinesis that  
171 leave cells connected via the midbody/intercellular bridge. From now on, we will call these

172 syncytial structures, originating from mononucleated cells and encapsulating several NSCs  
173 (Fig. 1g-h), CG units.

#### 174 **CG units can undergo cellular fusion**

175 Multicolour clonal analysis with membrane targeted Raeppli showed that individual CG cells  
176 give rise to neighbouring units with well-defined boundaries that tile the CNS (Fig. 1e, g).  
177 Intriguingly, we were also able to observe membrane areas with colours overlap (Fig. 4a),  
178 with numbers fluctuating over time (Supp. Fig. S4a-b). The partial nature of the overlap, as  
179 well as colour induction well before polyploidization (see Fig. 2i), excluded that such event  
180 would come from polyploid cells harbouring multiple copies of the genetic tool. We wondered  
181 whether colour sharing between two neighbouring units could be a result of cell-cell fusion.  
182 Cellular fusion is the process by which two cells merge their membranes into a single bilayer,  
183 resulting in the exchange of their cytoplasmic content and subcellular compartments. It is a  
184 key recurring event in life, from egg fertilization to organogenesis, through viral infection.  
185 Cell fusion is a stepwise operation (reviewed in<sup>58-61</sup>). First cells become competent for  
186 fusion, usually with one donor and one acceptor. They then adhere to each other through  
187 cell recognition molecules. Membrane hemifusion proceeds ultimately leading to pore  
188 formation. Cells start to exchange their cytoplasmic content through the pore, which widens,  
189 and eventually fully integrate, sharing all their compartments.

190 We first asked whether such partial colour overlap between clones could be detected for  
191 cellular compartments other than the plasma membrane. We took advantage of the CoinFLP  
192 technique, which allows the stochastic labelling in two colours of individual cells within the  
193 same population (Supp. Figure S4c)<sup>62</sup>. A bias in the system results in the generation of a  
194 minority of well-sparse clones in one of the two colours, making them easy to localise and  
195 quantify. Early induction of this tool in CG cells using *cyp4g15-FLP* (which is active before  
196 ALH0) and two differently-labelled fluorescent cytoplasmic markers (GFP and mCherry),  
197 generated three situations (Fig. 4b-c): i) a majority of clones of only one colour (GFP only,  
198 green); ii) clones fully colocalising with the other colour (GFP + mCherry complete overlap,  
199 grey); and iii) a minority of clones partially colocalising with the other colour (GFP + mCherry  
200 partial overlap, grey-hashed green). While full overlaps might come from polyploidy, at least  
201 in part, the occurrence of partial cytoplasmic overlaps fitted the hypothesis of fusion between  
202 CG units. We then performed a similar experiment this time using fluorescently-labelled  
203 mitochondrial markers, and also found partial colocalisation in some cases (Fig. 4d),  
204 suggesting that two CG units from different origins can share these organelles. Finally, we  
205 used a nuclear-tagged version of Raeppli (Raeppli-NLS) to identify the nuclei belonging to

206 different CG units. While we observed clones of neighbouring nuclei with a tiled organisation  
207 reminiscent of Raeppli-CAAX, and confirming clonal expansion of individual CG cells (Supp.  
208 Fig. S4d), we also found intriguing overlaps at the border of clones, with few nuclei exhibiting  
209 two colours showing qualitative inverse intensities (Suppl. Fig. S4e). This suggests that  
210 nuclei from different CG units in close vicinity can exchange nuclear targeted proteins. All  
211 together, these data show that CG units can share subcellular compartments, including  
212 plasma membrane, cytoplasm, mitochondria and nucleoplasm.

213 A first prediction arising from the occurrence of cellular fusion between CG units would be  
214 the creation of cellular compartments (*i.e.*, with a continuity of information) containing nuclei  
215 from different origins. To test this hypothesis, we expressed Kaede in the whole CG  
216 population, together with stochastic multicolour nuclear labelling (Raeppli-NLS) induced  
217 early, hence leading to differently labelled clonal CG units (such as seen in Supp. Fig 4d).  
218 Localised photoconversion led to a signal (cKaede) that propagated from within the targeted  
219 CG clone to nuclei of other colours, belonging to adjacent CG neighbours, both in the same  
220 plane and throughout the depth of the tissue (Fig. 4e and Movie S6). We observed this event  
221 in a number of CG units with diverse organisation (see Supp. Fig. 4f for another example),  
222 making the observation reproducible qualitatively while difficult to assess quantitatively in  
223 terms of extent of connection. A similar conclusion was reached through FLIP on CG  
224 expressing a cytoplasmic fluorescent marker (GFP) in Raeppli-NLS CG clones. Continuous  
225 bleaching in a small area of the cytoplasmic GFP surrounding one of the CG clones indeed  
226 resulted in a loss of fluorescence not only in the targeted CG clone, but also in its adjacent  
227 neighbour (Supp. Fig. 4g). From these data, we can conclude that CG units can fuse in a  
228 homotypic manner, and generate connected areas from different origins, leading to  
229 exchange of subcellular compartments and associated signals at larger spatial scale.

### 230 **Fusion of CG units is dynamic and can create novel cellular compartments**

231 Cell fusion entices that information could propagate from one cell to the other up to the end  
232 of the fused area. In classical models, the two partners fully integrate, generating one bigger  
233 cell. However, the existence of partial overlaps of cellular compartments (membrane,  
234 Fig. 4a; cytoplasm, Fig. 4b) is unusual and implies that the fusion did not lead to complete  
235 integration and sharing of all compartments between CG partners.

236 To determine the extent of compartmental continuity and signal propagation between the  
237 fusing/fused CG units, we combined the identification of zones of partial cytoplasmic overlap  
238 through CoinFLP (see Fig. 4b; GFP and mCherry) with a FLIP approach in live-imaging. We  
239 choose as example ( $n = 3$ ) a GFP clone displaying a partial overlap with mCherry, as well

240 as sharp borders with mCherry-only regions (Fig. 5a-e and Supp. Fig. 5-1a). Interestingly,  
241 the overlapping area also presented two sub-zones, distinguished by the GFP level ( $H_{GFP}$ ,  
242 high and  $L_{GFP}$ , low on Supp. Fig. 5-1a). To assess the effect of the FLIP, significance of the  
243 percentage of fluorescence loss (i.e., attribution to the FLIP rather than chance) was  
244 determined on the sample itself (see Methods and Supp. Fig. 5-1a-b) and 19.1%/20.8%  
245 were identified as thresholds for GFP and mCherry respectively (confidence level 95%).

246 First, we found that continuous localised bleaching of the GFP signal in a region devoided  
247 of any mCherry signal (GFP zone, Fig. 5a, Supp. Fig. 5-1, Supp. Fig. 5-2a and Movie S7)  
248 led to a loss of fluorescence not only in the CG clone targeted by the bleaching ( $\approx 87\%$  loss),  
249 but also in the overlapping adjacent area (GFP + mCherry, zone  $H_{GFP}$ ) ( $\approx 47\%$  loss), up to  
250 the border with another clone (mCherry alone). This shows that the overlapping zone  
251 between two CG clones is indeed in cytoplasmic continuity with at least one of them, and  
252 corresponds to area of some signal exchange. However, continuous localised bleaching of  
253 mCherry ( $\approx 78\%$  loss) in the same overlapping subzone ( $H_{GFP}$ ) did not lead to a significant  
254 decrease of fluorescence in the adjacent mCherry region (mCherry 1;  $\approx 13\%$  loss), even  
255 when restricting our analysis to a smaller, adjacent portion (mCherry 1 small,  $\approx 19\%$  loss;  
256 Fig. 5b, Supp. Fig. 5-1, Supp. Fig. 5-2b and Movie S8). This suggests that the fused  
257 mCherry-GFP compartment does not communicate, or at least in a detectable manner, with  
258 an original mCherry<sup>+</sup> clone. Moreover, we noticed that such bleaching of mCherry in the  
259  $H_{GFP}$  zone also did not result in a significant loss in the overlapping subzone with lower GFP  
260 signal ( $L_{GFP}$ ,  $\approx 0.4\%$  loss). This entails that some diffusion barrier exists between the two  
261  $H_{GFP}$  and  $L_{GFP}$  subzones. To confirm this observation, we performed the reciprocal FLIP  
262 experiment, and bleached a small area of mCherry signal in  $L_{GFP}$  (Fig. 5c, Supp. Fig. 5-1,  
263 Supp. Fig. 5-2c and Movie S9). While it led to a dramatic loss of mCherry signal in the  
264 targeted  $L_{GFP}$  subzone (70% loss), it did not affect the mCherry signal left in the  $H_{GFP}$  zone  
265 ( $\approx 8\%$  loss). This again revealed a sharp diffusion barrier between the  $L_{GFP}$  and  $H_{GFP}$   
266 subzones. However, we detected a restricted, albeit significant, decrease ( $\approx 22\%$  loss) in  
267 the mCherry signal adjacent to  $L_{GFP}$  (mCherry 2 small, Supp. Fig. 5-1a). This suggests that  
268 some cytoplasmic exchange is still happening between a fused zone ( $L_{GFP}$ ) and a mCherry-  
269 only zone (mCherry 2), which the fused zone is likely derived from. Finally, the existence of  
270 a diffusion barrier between the  $L_{GFP}$  and  $H_{GFP}$  subzones was further confirmed by bleaching  
271 in  $L_{GFP}$  the GFP signal (Fig. 5d, Supp. Fig. 5-1, Supp. Fig. 5-2d and Movie S10), whose  
272 fluorescence loss ( $\approx 64\%$  loss) did not propagate to the  $H_{GFP}$  compartment ( $\approx 9\%$  loss).  
273 Surprisingly, we did find however that it led to a decrease in the GFP signal of the GFP-only

274 area ( $\approx$  31% loss), implying that the original GFP clone is also still connected, to some level,  
275 to L<sub>GFP</sub>, in addition to H<sub>GFP</sub> (Fig. 5a).

276 All together, these data confirm that cellular fusion between CG units both happens and is  
277 atypical by its partial, dynamic nature. While it results in compartmental exchange between  
278 CG units, such sharing can be temporary, being severed or at least restricted after some  
279 time, as indicated by a remaining GFP-only compartment and a FLIP which propagates with  
280 sharp changes (e.g., between L<sub>GFP</sub>, 70%, and mCherry 2, 22%). As such, it results in the  
281 creation of novel CG cells/units, owning features of both original CG partners, from which  
282 they can eventually separate to form compartments with their own properties (Fig. 5e).

### 283 **Cell fusion between CG units is regulated by canonical fusion molecules**

284 A biological model which has been highly instrumental in deciphering fusion hallmarks is the  
285 generation of myofibers in *Drosophila* (reviewed in<sup>63–65</sup>). It follows a typical sequence of  
286 events (Supp. Fig. S6a): binding of the two partners, cascade of intracellular signalling,  
287 remodelling of the actin cytoskeleton and membrane hemifusion followed by pore formation.  
288 The end point is the creation of a multinucleated cell, the muscle fiber. These processes rely  
289 on key cell recognition and adhesion molecules (immunoglobulin-domain receptors: Sns,  
290 Hbs; Kirre/Duf and Rst), on adapter proteins (Rols7/Ants; Dock), as well as on the combined  
291 actions of multiple actin regulators (WASp, Rac, Scar, Arp2/3 to name a few). Adhesion  
292 through cell surface receptors and cytoskeletal remodelling are also core steps in myoblast  
293 fusion in vertebrates, involving some conserved molecular players<sup>63,66</sup>. Considering the  
294 atypical nature of cell fusion between CG units, we wondered whether similar molecular  
295 players, and as such, cellular events, were involved in this process.

296 First, using live-imaging, we assessed whether we could observe dynamic cellular behaviour  
297 at the border between CG units. Using two differently-labelled fluorescent cytoplasmic  
298 markers in a CoinFLP set up, we indeed observed active protrusion-like structures tunnelling  
299 into the reciprocal cells (Fig. 5f and Movie S11). This suggests that some cellular  
300 remodelling takes place at the interface between two fusing CG units. In addition, driving  $\beta$ -  
301 actin fused to CFP in CG revealed localised zones of higher activity (Supp. Fig. S5-2e).

302 Next, we asked whether known molecular players of myoblast fusion were expressed and  
303 required for fusion between CG units. In light of the restricted and for now spatially  
304 unpredictable occurrence of fusion events in the CG, we decided to first focus on molecular  
305 players known to be expressed in the two partners. We turned to Myoblast City (*mbc*), a  
306 Guanine nucleotide Exchange Factor (GEF) implicated in actin remodelling and known to  
307 be expressed, if not required<sup>67</sup>, in both fusing cells (Supp Fig. S6a). We first took advantage

308 of a genomic trap line inserting a GAL4 driver under the control of *mbc* enhancers (Trojan  
309 *mbc-GAL4*<sup>68,69</sup>). Driving both a nuclear (Hist::RFP) and membrane reporter (mCD8::GFP)  
310 revealed a strong expression in the CG (co-stained with the glial marker Repo), reproducing  
311 the characteristic CG meshwork pattern (Fig. 6a). Moreover, expressing lineage tracing  
312 tools (i-TRACE<sup>70</sup> and G-TRACE<sup>71</sup>) under *mbc-GAL4* indicated that *mbc* is expressed in the  
313 CG throughout development (Supp. Fig. S6b-d). *mbc* expression in the CG was further  
314 confirmed by immunostaining with an anti-Mbc antibody, whose staining was enriched along  
315 the CG membranes (Fig. 6b), and lost upon *mbc* RNAi-mediated downregulation in the CG  
316 (Fig. 6b). In addition, we were able to detect a faint and more restricted staining for the  
317 adhesion molecule Kirre, which colocalised with a marker for the CG membrane and which  
318 was lost under *kirre* knockdown in the CG (Fig. 6c). Altogether, Mbc and Kirre, two known  
319 regulators of myoblast fusion, are expressed in the CG during larval stages.

320 We then asked whether molecular players associated with myoblast fusion were required  
321 for fusion between CG units. We independently knocked down several fusion genes in the  
322 CG through RNAi while inducing multicolour clonal labelling (Raeppli-CAAX) and calculated  
323 the number of fusion events (overlap between at least two colours, see Methods) per VNC  
324 compared to a control condition (Fig. 6e). Strikingly, we observed a significant reduction in  
325 the number of fusion events when either *mbc*, *Wasp*, *rst* or *sns* were knocked down (Fig. 6e).  
326 For *mbc* and *Wasp*, which showed the most significant reductions, this was paired with a  
327 slight increase in number of clones per VNC (Fig. 6f). *hbs*, *kirre* and *lmd* knockdowns also  
328 tended towards a reduction in the number of fusion events, albeit the difference was not  
329 statistically significant (Fig. 6d-e and Supp. Fig. S6d-f). These data show that known  
330 molecular players of classical fusion pathways regulate fusion of CG units.

### 331 **Growth and atypical cell-cell fusion are required in CG for correct network** 332 **architecture and NSC ensheathing**

333 Our results show that CG perform a diversity of cellular processes during niche  
334 morphogenesis. Previous studies<sup>72</sup> had shown that PI3K/Akt-dependent cellular growth was  
335 essential to proper network architecture around NSCs (Supp. Fig. S7a, *CG>4p60*), while  
336 preventing mitotic entry through knockdown of *string/cdc25* (Supp. Fig. S7a, *CG>stg RNAi*)  
337 did not reveal detectable alterations. We enquired about the functional and respective  
338 relevance of the different processes we uncovered in building the accurate organisation of  
339 the seamless structure of the CG network. As to our knowledge no genetic conditions  
340 specifically forcing abscission have been identified in *Drosophila* so far, we focused on the  
341 impact of blocking replication-dependent growth and atypical fusion in CG.

342 First, we found that knocking down *dup* resulted in dramatic defects in CG growth and  
343 network formation (Fig. 7a, *CG>dup RNAi*), with very little CG signal left, which suggested  
344 that endoreplication is crucial to CG morphogenesis. The remaining CG cells sometimes  
345 harboured a globular morphology, a phenotype reminiscent of blocking membrane vesicular  
346 transport in these cells, a condition also associated with loss of proliferation<sup>32</sup>. Accordingly,  
347 compared to a control condition, the quantity of CG membrane by NSC was very low, and  
348 NSCs were rarely found in individual chambers (Fig. 7b-c).

349 Next, taking advantage of our data identifying molecular regulators of fusion between CG  
350 units (Fig. 6), we assessed the impact of their downregulation in the CG. We observed that  
351 individually knocking down fusion genes resulted in alterations of the overall CG network  
352 structure, ranging in magnitude (Fig. 7a and Supp. Fig. S7b). We first found that *WASp RNAi*  
353 led to a striking disorganisation of the CG network, with heterogeneous coverage along the  
354 network (Fig. 7a, *CG>WASp RNAi*), less CG membrane available per NSC in average (Fig.  
355 7b) and destruction of NSC chamber structure (Fig. 7c). In addition, we noticed local  
356 accumulation of CG membranes (pink arrows, Fig. 7a). Such phenotype was also apparent  
357 through Raeppli CAAX (Fig. 6c). As *WASp* is a general regulator of actin cytoskeleton, by  
358 enabling actin nucleation for microfilament branching, it is possible that its effects bypass its  
359 strict involvement in fusion mechanisms, leading to strong phenotypes. Looking at other  
360 regulators of cell-cell fusion, we observed localised disruptions or alterations in chamber  
361 shapes for *mbc*, *sns*, *dock*, and, to a lesser extent, for *kirre* (Supp. Fig. 7b). For *mbc*  
362 knockdown in particular, we noticed some heterogeneous distribution of the CG membrane  
363 (Fig. 7a, *CG>mbc RNAi*), which was accompanied by a significant decrease in the quantity  
364 of CG membrane associated with NSCs (Fig. 7b). Importantly, we also observed several  
365 occurrences of CG chambers containing more than one NSC (Fig. 7a, yellow arrows;  
366 Fig. 7b), mostly grouped by two (Fig. 7d). This suggests that CG fusion is involved in  
367 ensuring the individual ensheathing of NSCs by CG membrane. These observations led us  
368 to propose that fusion genes, and especially or at least in a more detectable fashion actin-  
369 related genes, are important for the formation of CG network and chamber organisation. All  
370 together, these data demonstrate that growth and fusion define the stereotypical  
371 architecture of the CG niche both as a network and as a structure of individual ensheathings  
372 of NSCs.

## 1 **Discussion**

2 Here we dissect the cellular mechanisms supporting the acquisition of architectural  
3 complexity in the NSC niche using the morphogenesis of the CG network in *Drosophila*. We  
4 have first uncovered that individual CG cells grow extensively during niche formation.  
5 Distinct proliferative strategies convert them into syncytial units in which the different nuclei  
6 stay connected, in part through cytoplasmic bridges. We found that these CG units ensheath  
7 NSC subsets, covering the entire population in a tile-like fashion. CG units can further  
8 undergo homotypic fusion, sharing several subcellular compartments. While this process  
9 relies on classical pathways involving conserved cell surface receptors and actin regulators,  
10 it is also highly atypical at several levels. Its location is variable, not (yet) predictable, and it  
11 is dynamic/transient in time and partial in space, resulting in remodelled compartments from  
12 original partners. Ultimately, the combination in time and space of cellular growth,  
13 proliferation and fusion are required to build the complex and robust architecture of the CG  
14 niche (Fig. 8). Altogether, our findings identify principles of niche formation, revealing  
15 unexpected and original cellular processes, while highlighting its impact on organising the  
16 NSC population and a remarkable conservation of the spatial partition of glial networks.

17 Polyploidy has been associated with large cells or cells that need to be metabolically active,  
18 as a way to scale their power of biosynthesis to their cellular functions<sup>39,48</sup>. For example, the  
19 megakaryocytes of the bone marrow, which are required to generate large quantities of  
20 mRNA and protein for producing platelets, undergo polyploidization. Polyploidy is also an  
21 elegant way to support cell growth while protecting a specific cell architecture that would  
22 suffer from mitosis-associated adhesion and cytoskeleton changes. In this line, the  
23 polyploidization of the subperineurial glia, which exhibit strong junctions to fulfil its role as a  
24 blood-brain barrier, maintains barrier integrity in response to CNS growth<sup>45</sup>. The CG cells,  
25 which have a highly complex topology integrating NSC position and display large sizes (Fig.  
26 1f) fit both categories.

27 Importantly, increase in ploidy can be achieved by different processes, many of which rely  
28 on variations of the cell cycle<sup>37,38,47,73</sup>, including endocycle, endomitosis and acytokinetic  
29 mitosis. Here we propose that CG exhibit several of these cycling strategies. The increase  
30 in chromosome number seen in some nuclei (Fig. 2h-i) as well as some aborted DNA  
31 segregation at anaphase (Fig. 2l) imply that CG undergo either endocycling or endomitosis  
32 without nuclear division. In addition, some CG perform acytokinetic mitosis, displaying all  
33 stages of mitosis including midbody formation (Fig. 2c-d, f-g and Supp. Fig. S2b), but without  
34 abscission, leading to a syncytial, multinucleated unit of CG cells (Fig. 3c-g). We cannot



35 exclude that some CG cells complete cytokinesis and undergo proper cell division, an  
36 outcome challenging to observe considering CG architecture. Interestingly, acytokinetic  
37 mitosis takes place in the germline stem cell niche of many animals<sup>74</sup>, including in *Drosophila*  
38 in which the maturing oocyte and supporting nurse cells stay connected by ring canals,  
39 intercellular bridges that are stabilized on arrested cleavage furrows<sup>75</sup>. While we identified  
40 several components of ring canals in midbody-like puncta present along the CG membrane  
41 (Fig. 3e and Supp. Fig. 3b-c), the exact composition and regulation of such structure in the  
42 CG remain to be deciphered.

43 Notably, blocking endoreplication is detrimental to network formation (Fig. 7a-c), whereas  
44 preventing the increase in CG nuclei (through knockdown of *string/cdc25*, which prevents  
45 mitotic entry, Supp. Fig. S7a or through expression of the cyclin E/cdk2 inhibitor *dacapo*,  
46 which blocks G1 to S transition) did not have any detectable impact<sup>27</sup>. This is a puzzling  
47 observation suggesting that endoreplication is of higher importance than mitosis in steady-  
48 state conditions, and that common players (*i.e.*, *dacapo*) might have more instrumental  
49 functions in one process versus the other. How the balance between endoreplication and  
50 mitosis is regulated, as well as more generally the trigger(s) and timing for these processes  
51 are key questions that need to be addressed. The antero-posterior wave of CG cycling  
52 (Fig. 2a) is particularly intriguing. Notably, CG proliferation depends on nutrition via  
53 activation of the PI3K/Akt pathway<sup>27,40</sup> (Supp. Fig. S7a). The interplay between spatial and  
54 temporal signalling will thus be of special interest.

55 Using several approaches, including dual and multicolour clonal analysis for different  
56 subcellular compartments, FLIP experiments, photoconversion and targeted loss of  
57 function, we have shown that CG units have the ability to interact with each other and share  
58 their components in a manner dependent of known molecular players of myoblast fusion. A  
59 puzzling observation is the spatially-limited nature of this exchange, as witnessed through  
60 cytoplasmic and membrane markers (Fig. 4a-c). Our data indeed support the existence of  
61 atypical fusion events, partial in space and dynamic in time. Classical cell-cell fusion, such  
62 as myoblast fusion, is complete and irreversible, leading to full combination of all  
63 components in time. Although some heterogeneity in the mixing of components of the cells  
64 of origin could be happening, depending on molecular properties (*i.e.*, membrane proteins;  
65 phase separation) or fixed positioning (*i.e.*, nuclei), here we are able to observe sharp  
66 boundaries between fused and unfused regions (Fig. 4a-b). A possibility could be that we  
67 catch the event at a very early stage. However, in this case we should expect some complete  
68 colour overlap at later stages, at least at the same frequency with which partial mixing

69 happened at the previous recorded stages, something we do not see (see Fig. 1e, ALH96,  
70 representative of the rarity of complete overlaps at this stage). A fitting explanation could be  
71 that the fusion happening between CG cells is somehow transient, and that other, unknown  
72 mechanisms exist to rupture and close membranes again, severing the communication  
73 between the two original CG units, either on one side or in both. Cytoplasmic exchange  
74 between CG units could be constantly remodelling, generating alternating phases of fusion  
75 and separation and creating a complex continuum of CG combinations, which could keep  
76 evolving over time. Our FLIP experiments (Fig. 5) support this hypothesis by showing that  
77 fused domains can lose or alter their connection with the original, still present, CG unit and  
78 become a novel cytoplasmic compartment with its own properties. As such, contrary to  
79 classical fusion in which two cells lead to one cell/compartment, here two cells can lead to  
80 three or more cells/compartments (Fig. 5e). These compartments will inherit characteristics  
81 from the original fusing partners, as demonstrated by cytoplasmic mixing and the existence  
82 of CG units with connected nuclei of different origins (Fig. 4b-c, e). The observation of a  
83 lesser intensity of one of the fluorophores in the shared, fused zone compared to the CG  
84 unit of origin (Fig. 4a for membrane and Fig. 5 for cytoplasm) actually fits with the hypothesis  
85 of restricted remaining connection with the original CG unit. Interestingly, there has been  
86 some previous reports of partial cell fusion (discussed in<sup>76</sup>), suggesting that such  
87 phenomenon might be underestimated. The involvement of some of the molecular players  
88 controlling myoblast fusion, with conservation in vertebrates (*e.g.*, *mbc/Dock180*;  
89 *Kirre/Kirrel*) suggests shared adhesion and actin-dependent mechanisms with classical  
90 fusion. However, whether similar cell players (*e.g.*, fusion competent cells versus founder  
91 cells), molecular interactions and intracellular signalling happen in CG is left to be  
92 demonstrated. Recently, full cytoplasmic exchange between cells of the *Drosophila* rectal  
93 papillae have been shown to happen through membrane remodelling and gap junction  
94 communication rather than classical fusion pathways<sup>77</sup>.

95 The parameters regulating the frequency, location and timing of these atypical fusion events  
96 also remain mysterious. A way to understand when and where fusion happens might be to  
97 understand why it happens. Here we show that fusion between CG units is required for a  
98 gapless, seemingly-continuous meshwork as well as for the individual ensheathing of NSCs  
99 (Fig. 7a-d). Beyond a more generic role of the actin cytoskeleton in CG architecture, this  
100 could suggest that CG fusion somehow ensures that no gap in CG network and in the  
101 associated coverage of NSCs is left unmet. Fusion could act as a rescue mechanism,  
102 kicking in when seamless tiling between CG units fails. Curiously, CG have a certain

103 capacity to replace each other when ablated, seemingly able to probe space and reach  
104 neighbours<sup>32</sup>. How much fusion mechanisms could participate in this sensing and repair is  
105 an intriguing question. Another, seducing, hypothesis would see such dynamic fusion as a  
106 powerful strategy to modulate the extent of communication and signal exchange within the  
107 CG network, as a response either to CG own fluctuating needs or to NSC behaviour, fulfilling  
108 its role as a neurogenic niche. The fact that cellular fusion is able to change the number and  
109 coverage/size of CG units implies that the spatial, modular partition of the NSC population  
110 can be remodelled over time, and possibly upon varying NSC needs. In this line, we noticed  
111 slight fluctuations in the number of fusion events (Supp. Fig. S4b), as well as in the number  
112 of NSCs encased by one CG unit overtime (Fig. 1h, decrease between ALH72 to ALH96),  
113 hinting that remodelling of CG unit boundaries might be a way to control niche properties  
114 along neurogenesis. Further work will be needed to assess whether the physical partition of  
115 the NSC population also translates into a functional one. This would be crucial to understand  
116 how NSCs behave as a coordinated population versus groups of individual cells.

117 Here we show that a glial network is built from cell growth and fusion mechanisms, resulting  
118 in a highly connected, yet partitioned, structure which ensheathes NSCs. These findings  
119 uncover principles of niche organisation that ultimately creates a modular structure spatially  
120 subdividing the NSC population, a fascinating discovery within the context of individual  
121 versus population-based regulation of stem cells. It interesting to note that astrocytes have  
122 been shown to set up gap junctions between them, becoming a so-called astrocytic  
123 syncytium<sup>78,79</sup>, while at the same time occupying mostly non-overlapping, defined sub-  
124 territories<sup>80,81</sup>. Astrocytes in the mammalian NSC niche also form, through their end feet, a  
125 reticular structure sitting between neural progenitors and the blood vessels<sup>10</sup>, similarly to the  
126 *glia limitans* between the meninges and the cerebral parenchyma<sup>82</sup>. This suggests that  
127 connected, modular glial networks might be a common occurrence during CNS  
128 development. Understanding the features and regulators of CG morphogenesis, as well as  
129 the resulting roles on neurogenesis, thus provides an original blueprint to explore the multi-  
130 faceted roles of glial networks, as well as the morphogenetic processes of complex niche  
131 structures.

## 1 Methods

### 2 Fly lines and husbandry

3 *Drosophila melanogaster* lines were raised on standard cornmeal food at 25°C. Lines used  
4 in this study are listed in the table below:

| Strains                                            | Source                   | Stock number/Reference |
|----------------------------------------------------|--------------------------|------------------------|
| <i>w<sup>1118</sup></i>                            | BDSC                     | 5905                   |
| <i>Nervana2::GFP (Nrv2::GFP)</i>                   | BDSC                     | 6828                   |
| <i>tubulin-GAL80<sup>thermosensitive(ts)</sup></i> | BDSC                     | 65406                  |
| <i>Cre recombinase</i>                             | BDSC                     | 851                    |
| <i>yw, hs-FLP</i>                                  | Andrea Brand lab         |                        |
| <i>CoinFLP</i>                                     | BDSC                     | 58750                  |
| <i>cyp4g15-GAL4</i>                                | BDSC                     | 39103                  |
| <i>cyp4g15-FRT-STOP-FRT-LexA</i>                   | This study               |                        |
| <i>cyp4g15-FLP</i>                                 | This study               |                        |
| <i>cyp4g15-mtd::Tomato</i>                         | This study               |                        |
| <i>alm-GAL4</i>                                    | Marc Freeman lab         | <sup>83</sup>          |
| <i>mbc-GAL4 (Trojan)</i>                           | BDSC                     | 66840                  |
| <i>UAS-H2B::YFP (Hist::YFP)</i>                    | François Schweisguth lab | <sup>84</sup>          |
| <i>UAS-H2B::RFP (Hist::RFP)</i>                    | Yohanns Bellaïche lab    | <sup>85</sup>          |
| <i>UAS-His3.3.mIFP-T2A-HO1 (Hist::IFP)</i>         | BDSC                     | 64184                  |
| <i>UAS-GFP</i>                                     | BDSC                     | 1522                   |
| <i>UAS-mCD8::GFP</i>                               | BDSC                     | 5130                   |
| <i>UAS-mCD8::RFP</i>                               | BDSC                     | 27399                  |
| <i>UAS-mito::GFP</i>                               | BDSC                     | 8443                   |
| <i>UAS-GFP::Alix</i>                               | Jean-René Huynh lab      | <sup>54</sup>          |
| <i>UAS-hβactin::ECFP</i>                           | BDSC                     | 7064                   |
| <i>LexAOp-mCherry::mito</i>                        | BDSC                     | 66531                  |
| <i>UAS-Raeppli CAAX 43E</i>                        | BDSC, This study         | 55082                  |
| <i>UAS-Raeppli NLS 53D</i>                         | BDSC, This study         | 55087                  |
| <i>LexAop-Raeppli CAAX 43E</i>                     | BDSC, This study         | 55082                  |
| <i>UAS-mRFP::Scra</i>                              | BDSC                     | 52220                  |
| <i>Fly FUCCI</i>                                   | BDSC                     | 55117                  |
| <i>G-TRACE</i>                                     | BDSC                     | 28280                  |
| <i>iTRACE</i>                                      | BDSC                     | 66387                  |
| <i>Ubi-p63E-GFP::Pavarotti</i>                     | David Glover lab         | <sup>86</sup>          |
| <i>UAS-mbc RNAi</i>                                | BDSC                     | 32355                  |
| <i>UAS-WASp RNAi</i>                               | BDSC                     | 51802                  |
| <i>UAS-rst RNAi</i>                                | VDRRC                    | 27223                  |
| <i>UAS-hbs RNAi</i>                                | BDSC                     | 57003                  |
| <i>UAS-kirre RNAi</i>                              | VDRRC                    | 27227                  |
| <i>UAS-Imd RNAi</i>                                | BDSC                     | 42871                  |
| <i>UAS-sns RNAi</i>                                | BDSC                     | 64872                  |
| <i>UAS-dock RNAi</i>                               | BDSC                     | 27728                  |

|                     |      |               |
|---------------------|------|---------------|
| <i>UAS-dup RNAi</i> | BDSC | 29562         |
| <i>UAS-stg RNAi</i> | BDSC | 34831         |
| <i>UAS-Kaede</i>    | BDSC | 26161         |
| <i>UAS-Δp60</i>     |      | <sup>87</sup> |

5

## 6 Larval staging

7 Embryos were collected within 2-4 hours window on grape juice-agar plates and kept at  
8 25°C for 20-24 hours. Freshly hatched larvae were collected within a 1 hour time window  
9 (defined as 0 hours after larval hatching, ALH0), transferred to fresh yeast paste on a  
10 standard cornmeal food plate and staged to late first instar (ALH24), late second instar  
11 (ALH48), mid third instar (ALH72) and late third instar (ALH96).

12

## 13 DNA cloning and Drosophila transgenics

14 A portion of the *cyp4g15* enhancer (GMR55B12, Flybase ID FBsf0000165617), which drives  
15 in the cortex glia and (some) astrocyte-like glia, was amplified from genomic DNA extracted  
16 from *cyp4g15-GAL4* adult flies, with a minimal Drosophila synthetic core promoter [DSCP<sup>88</sup>]  
17 fused in C-terminal.

18 For creating *cyp4g15-FLP*, the *FLP* DNA, which codes for the flippase enzyme, was  
19 amplified from the plasmid pMH5<sup>89</sup> (Addgene 52531). This amplicon together with the  
20 *cyp4g15*<sup>DSCP</sup> enhancer were joined using the Multisite gateway system<sup>90</sup> in the destination  
21 vector pDESThaw sv40 (gift from S. Stowers) in order to generate a *cyp4g15*<sup>DSCP</sup>-*FLP*  
22 construct. The construct was integrated in the fly genome at an attP18 docking site through  
23 PhiC31 integrase-mediated transgenesis (BestGene). Several independent transgenic lines  
24 were generated and tested, and one was kept (*cyp-FLP*).

25 For creating *cyp4g15-mtd::Tomato*, the *mtd::Tomato* DNA, which codes for a Tomato  
26 fluorescent protein tagged at the N-terminal end with Tag:MyrPalm (MGCCFSKT, directing  
27 myristoylation and palmitoylation) and at the C-terminal with 3 Tag:HA epitope, was  
28 amplified from genomic DNA extracted from QUAS-mtd-Tomato adult flies (BDSC30005,  
29 Chris Potter lab), as described in <sup>91</sup>. This amplicon together with the *cyp4g15*<sup>DSCP</sup> enhancer  
30 were joined using the Multisite gateway system<sup>90</sup> in the destination vector pDESThaw sv40  
31 gift from S. Stowers) in order to generate a *cyp4g15*<sup>DSCP</sup>-*FLP* construct. The construct was  
32 integrated in the fly genome at an attP2 or attP40 docking site through PhiC31 integrase-  
33 mediated transgenesis (BestGene). Several independent transgenic lines were generated  
34 and tested, and one was kept for each chromosome (*cyp-mtd::Tomato*).

35 For creating *cyp4g15-FRT-STOP-FRT-LexA*, a FRT STOP cassette was amplified from an  
36 UAS-FRT.STOP-Bxb1 plasmid (gift from MK. Mazouni) and the LexA sequence was

37 amplified from the entry vector L2-LexA::p65-L5 (gift from M. Landgraf). The two amplicons  
38 were joined together by overlapping PCRs. This *FRT-STOP-FRT-LexA* amplicon together  
39 with the *cyp4g15<sup>DSCP</sup>* enhancer were inserted in the destination vector pDESThaw sv40  
40 using Multisite gateway system<sup>90</sup> to generate a *cyp4g15<sup>DSCP</sup>-FRT-STOP-FRT-LexA::p65*  
41 construct. The construct was integrated in the fly genome at an attP2 or attP40 docking sites  
42 through PhiC31 integrase-mediated transgenesis (BestGene). Several independent  
43 transgenic lines were generated and tested, and one was kept for each docking site.

44

### 45 **Generation of UAS-Raepli and LexAOp-Raepli lines**

46 The original construct (BDSC 55082), placing Raepli CAAX under the control of both UAS  
47 and LexAOp sequences, was crossed to a Cre recombinase line (BDSC 851) to randomly  
48 excise one of the two control sequences. The resulting lines were checked by PCR to  
49 determine whether they carried the UAS or LexAop version.

50 A similar protocol was followed to generate UAS-Raepli NLS 53D and LexAOp-Raepli  
51 NLS 53D constructs from the original line BDSC 55087.

52

### 53 **Fixed tissue Immunohistochemistry and imaging**

54 For immunohistochemistry, CNS from staged larvae were dissected in PBS, fixed for 20 min  
55 in 4% formaldehyde diluted in PBS with 0.1% Triton X-100, washed two times in PBS-T  
56 (PBS+0.3% Triton X-100) and incubated overnight at 4°C with primary antibodies diluted in  
57 PBS-T. After washing three times in PBS-T, CNS were incubated overnight at 4°C with  
58 secondary antibodies (dilution 1:200) and DAPI (1:1000) diluted in PBS-T. Brains were  
59 washed three times in PBS-T and mounted in Mowiol mounting medium on a borosilicate  
60 glass slide (number 1.5; VWR International). Primary antibodies used were: guinea pig anti-  
61 Dpn (1:5000, in-house made, using pET29a-Dpn plasmid from J. Skeath for production),  
62 rabbit anti-Dpn (1:200, gift from R. Basto), chicken anti-GFP (1:2000, Abcam ab13970), rat  
63 anti-ELAV (1:100, 7E8A10-c, DSHB), mouse anti-Repo 1:100 (DSHB, 8D12-c), rabbit anti-  
64 Phospho-histone H3 (1:100, Millipore 06-570), rat anti-*mbc*<sup>92</sup> (1/200, gift from S. Abmayr),  
65 guinea pig anti-*kirre*<sup>93</sup> (1/1000, gift from S. Abmayr) and rabbit anti-Mucin D<sup>94</sup> (1/1000, gift  
66 from AA. Kramerov). Fluorescently-conjugated secondary antibodies Alexa Fluor 405, Alexa  
67 Fluor 488, Alexa Fluor 546 and Alexa Fluor 633 (ThermoFisher Scientific) were used at a  
68 1:200 dilution. DAPI (4',6-diamidino-2-phenylindole, ThermoFisher Scientific 62247) was  
69 used to counterstain the nuclei.

70

71

## 72 **Image acquisition and processing**

73 Confocal images were acquired using a laser scanning confocal microscope (Zeiss LSM  
74 880, Zen software (2012 S4)) with a Plan-Apochromat 40x/1.3 Oil objective. All brains were  
75 imaged as z-stacks with each section corresponding to 0.3-0.5  $\mu\text{m}$ . Images were  
76 subsequently analysed and processed using Fiji (Schindelin, J. 2012), Volocity 6.3 (Quorum  
77 technologies), the Open-Source software Icy v2.1.4.0 (Institut Pasteur and France  
78 Bioimaging, license GPLv3) and Photoshop (Adobe Creative Cloud).

79

## 80 **Live imaging**

81 For live imaging, culture chambers were prepared by adding 300  $\mu\text{l}$  of 1% low-melting  
82 agarose prepared in Schneider's medium supplemented with pen-strep on a glass-bottom  
83 35 mm dish (P35G-1.5-14-C, MatTek Corporation) and allowed to solidify. Circular wells of  
84 approximately 2 mm diameter were then cut out using a 200  $\mu\text{l}$  pipette tip fitted with a rubber  
85 bulb. CNS from staged larvae were dissected in Schneider's *Drosophila* medium (21720-  
86 024, Gibco) supplemented with 10% heat-inactivated fetal bovine serum (10500, Gibco),  
87 penicillin (100 units  $\text{ml}^{-1}$ ) and streptomycin (100  $\mu\text{g ml}^{-1}$ ) (penicillin-streptomycin 15140,  
88 Gibco). 4–6 CNS were placed inside small wells of a pre-prepared culturing chamber and  
89 covered with culture medium (Schneider's + 5 % FBS + larval lysate (10  $\mu\text{l/ml}$ ) + pen/strep  
90 (1/100). Larval lysate is prepared by homogenising twenty 3rd instar larvae in 200  $\mu\text{l}$  of  
91 Schneider's, spinning down once at 6000 rpm for 5min at 4°C, and recovering the  
92 supernatant. Brains were set in position and let to settle around 5-10 minutes before starting  
93 imaging. Brains were imaged on a laser scanning confocal microscope (Zeiss LSM 880, Zen  
94 software (2012 S4)) fitted with a temperature-controlled live imaging chamber (TC incubator  
95 for Zeiss Piezo stage, Gataca systems) using a Plan-Apochromat 40x/1.3 Oil objective.  
96 Four-dimensional z-stacks of 5–10  $\mu\text{m}$  at 0.5  $\mu\text{m}$  intervals were acquired every 2-3min.  
97 Movies were performed on the ventral side of the ventral nerve cord. Images were  
98 subsequently analysed and processed using Fiji (Schindelin, J. 2012).

99

## 100 **Quantification of cortex glia nuclei and mitotic cortex glia**

101 Wild-type brains expressing RFP or GFP-tagged (*Hist::RFP* or *Hist::YFP*, respectively)  
102 driven by *cyp4g15-GAL4*, were stained with phospho-histone H3 antibody to detect mitotic  
103 CG. Entire brains were imaged and quantification of total and mitotic CG nuclei numbers  
104 were performed in Volocity 6.3 (Quorum technologies) using adjusted protocols for detection  
105 of objects.

106

### 107 **Cell cycle analysis (FUCCI)**

108 We used the Fly-FUCCI system<sup>41</sup> that allows to discriminate between different phases of  
109 the cell cycle by expressing truncated forms of E2F and Cyclin B (CycB) fused to EGFP and  
110 mRFP1, respectively (EGFP::E2F 1-230, mRFP1::CycB 1-266). We used the *cyp4g15-*  
111 *GAL4* driver to express UAS-EGFP::E2F 1-230 and UAS-mRFP1::CycB 1-266 in CG cells.  
112 Staging of larvae was performed at 25°C and brains were dissected in PBS at ALH0, ALH24,  
113 ALH48, ALH72 and ALH96. Brains were immediately fixed in 4 % formaldehyde diluted in  
114 PBS for 20 min, washed 3 times in PBS and mounted in Mowiol mounting medium on glass  
115 slides. Samples were imaged as described above and quantification of G1 (green), S (red)  
116 and G2/M CG nuclei was performed in Volocity 6.3 (Quorum technologies).

117

### 118 **Multicolour clonal analyses (Raeppli)**

119 Heat-inducible Raeppli clones were generated by crossing *yw; UAS-Raeppli-CAAX 43E;*  
120 *cyp4g15-Gal4/TM6B* or *yw; UAS-Raeppli-nls 53D; cyp4g15-Gal4/TM6B* males to *hs-FLP*  
121 females. For knockdown experiments, chosen RNAi lines were crossed with *yw, hs-FLP;*  
122 *cyp-FRT-STOP-FRT-LexA/CyO; cyp4g15-GAL4, LexO-Raeppli-CAAX 43E*. Freshly  
123 hatched larvae (ALH0) were heat shocked for 2 hours at 37°C and aged to ALH24, ALH48,  
124 ALH72 and ALH96 at 25°C, or at 29°C for RNAi experiments. For the visualization of clones  
125 at ALH0, constitutively expressed *Cyp-FLP* females were crossed to *yw; UAS-Raeppli-*  
126 *CAAX 43E; cyp4g15-Gal4/TM6B* males. Immunolabelling of NSCs for Fig. 1e was  
127 performed as described above. For all other experiments, CNS were dissected and fixed for  
128 20 min in 4% formaldehyde in PBS and washed three times in PBS before mounting. Images  
129 were acquired as described above using the spectral mode of a Zeiss LSM880 confocal to  
130 promote fluorophore separation.

131

### 132 **Quantification of clone volumes (Raeppli)**

133 Raeppli TFP1 clones were chosen for quantification as it is the strongest and sharpest of  
134 the four Raeppli fluorophores. Only clones in the ventral nerve cord were measured.  
135 Volumes were measured in 3D images using Volocity 6.3 (Quorum technologies).

136

### 137 **Quantification of clone overlap (Raeppli)**

138 Z stacks of Raeppli CAAX 53E clones induced in CG were visualized in Icy v2.1.4.0 (Institut  
139 Pasteur and France Bioimaging, license GPLv3). Boundaries of all one-colour clones, for  
140 each of the 4 possible, were mapped manually and outlined with polygons. The same was



141 done in the rare case of full colour overlap. Partial overlaps between clones (defined as an  
142 overlap between the colours of adjacent clones that do not cover fully any of the two clones)  
143 were then counted manually, with their position recorded on the stack by drawing an ellipse.  
144 The clones were counted in the VNC only, stopping at the middle of the neuropile coming  
145 from the ventral side, as the great majority of NSCs are located ventrally.  
146 The number of overlaps counted corresponds to the number of fusion events, that we then  
147 divided by the total number of clones to generate a “Number of events/clones”.

148

### 149 **Clonal analyses using CoinFLP**

150 The recently described Coin-FLP method<sup>62</sup> was used to generate red and green mosaics of  
151 CG cells. CoinFLP clones were generated by crossing *Cyp-FLP; CoinFLP* females to *yw;*  
152 *LexAop-mCherry; UAS-GFP* or *yw; LexAop-mCherry::mito; UAS-mito-GFP* males and  
153 maintained at 25°C. Larvae were staged to ALH48-ALH72 at 25°C. For fixed tissue  
154 analyses, brains were dissected and fixed for 20 min in 4% formaldehyde in PBS and  
155 washed three times in PBS before mounting. Images were acquired as described above.  
156 For live imaging and FLIP experiments (see below), CNS were dissected in Schneider’s  
157 medium and mounted as described for live imaging.

158

### 159 **Fluorescence loss in photobleaching (FLIP)**

160 FLIP experiments were performed in dissected larval brains mounted as described above  
161 for live imaging. Fluorescence in a selected region of interest (ROI) within a CG cell was  
162 repeatedly photobleached over time, and loss of fluorescence in nonbleached regions were  
163 monitored. Bleaching was performed on GFP expressed in CG using the *cyp4g15-GAL4*  
164 driver. Laser line 488 was used at 100%. Images were acquired as follows: one z-stack of  
165 5–10 µm at 0.3-0.5 µm intervals before bleaching (Pre-bleach), followed by 100 continuous  
166 acquisitions at the bleaching plane during the bleaching (Bleach) and one z-stack of 5–  
167 10 µm at 0.3-0.5 µm intervals after bleaching (Post-bleach). Images were subsequently  
168 analysed and processed using Fiji.

169

### 170 **Quantification of Fluorescence loss in photobleaching (FLIP)**

171 Measures of fluorescence intensities over time (Fig. 5 and Supp. Fig. 5-1c) were performed  
172 on Volocity 6.3 (Quorum technologies). For each region (GFP only, mCherry only, fused  
173 H<sub>GFP</sub> and fused L<sub>GFP</sub>), a ROI was drawn manually to follow the contours of the corresponding  
174 area at time T<sub>0</sub>. The same ROI was kept throughout, except for Fig. 5d, in which a slight x-  
175 shift of the ROI shape was performed at the last timepoint (T<sub>100</sub>) to adjust a restricted x-

176 drift in the tissue. Mean intensities ( $I_{\text{MEAN}}$ ) were calculated for each channel in each ROI.  
177 The percentage of fluorescence loss in the ROI for each channel (%FL) was determined  
178 with the following formula:  $\%FL = (I_{\text{MEAN Tstart}} - I_{\text{MEAN Tend}}) / I_{\text{MEAN Tstart}}$ .

179 Due to the existence of i) FLIP-independent decay in fluorescence due to imaging-related  
180 photobleaching, and ii) of FLIP-independent variations in fluorescence over time (*e.g.*, small  
181 tissue z-shifts, intracellular movements) as well as iii) potential unknown effects of  
182 photobleaching of one fluorophore on the other one, we determined for each fluorophore  
183 the maximum percentage of loss in fluorescence under which it can be attributed to random  
184 variations, with a confidence level of 95%. %FL during a FLIP experiment exceeding this  
185 maximum can therefore be considered as a significant variation.

186 To do so, for each movie, we performed a Monte-Carlo analysis on %FL in the channel  
187 corresponding to the unbleached fluorophore (Figures 5a: mCherry; 5b: GFP; 5c: GFP and  
188 5d: mCherry; python script available upon request). This was achieved by sampling %FL  
189 over ten thousand randomly positioned 10 X 10  $\mu\text{m}$  squares. A Cumulative Distribution  
190 Function was then generated from the results and used to calculate the %FL value required  
191 for a 99% confidence level (*i.e.*, if %FL exceeds this value, it is unlikely to be due to random  
192 variations, but can be attributed to the FLIP photomanipulation). For each fluorophore, as  
193 we treated two movies, we obtained two %FL values fitting the 95% confidence level (Supp.  
194 Fig. 5-1b). We then kept the most stringent (*i.e.*, higher) one. For GFP, the threshold is  
195 19.1% and for mCherry, the threshold is 20.8%. As such, only %FL values above these  
196 thresholds were considered significant during the FLIP experiments for attributing the loss  
197 in fluorescence to the FLIP.

198

### 199 **Kaede photoconversion**

200 Photoconversion experiments were performed in dissected larval brains mounted as  
201 described above for live imaging. GFP fluorescence in a selected region of interest (ROI)  
202 within a CG cell was illuminated with iterative pulses (each cycle) of a 405 nm diode. Diode  
203 power was between 3 and 4%. While single pulse achieved localised conversion in the ROI,  
204 it was not enough to visualize diffusion of the converted Kaede form in the CG units, which  
205 are of large size.

206 Images were acquired as follows: one z-stack of 30-40  $\mu\text{m}$  at 0.5-1  $\mu\text{m}$  intervals before  
207 photoconversion (Pre-photoconversion), followed by 50 continuous acquisitions at the  
208 bleaching plane during the photoconversion (Photoconversion) and one z-stack of 30-40  $\mu\text{m}$   
209 at 1  $\mu\text{m}$  intervals after photoconversion (Post- photoconversion). Images were subsequently  
210 analysed and processed using Fiji.

211 For visualizing Raepli-NLS and Kaede simultaneously, we used spectral imaging (Zeiss  
212 Quasar 34 channels) to acquire and distinguish between mTFP1, GFP, mOrange, mRFP  
213 and mKate.

214

### 215 **Quantitative analysis of ploidy by fluorescence in situ hybridization (FISH) of** 216 **chromosomes**

217 The FISH protocol was performed as previously described<sup>44</sup> using oligonucleotide probes  
218 for chromosomes II and III labelled with 5'CY3 and FAM488 fluorescent dyes respectively  
219 (gift from R. Basto). FISH was performed in CNS expressing Histone::RFP or Histone::GFP  
220 in CG and dissected in PBS at ALH0, ALH24, ALH48, ALH72 and ALH96. Briefly, dissected  
221 brains were fixed for 30 min in 4% formaldehyde prepared in PBS with 0.1% tween 20,  
222 washed three times/ 10min in PBS, washed once 10min in 2xSSCT (2xSSC (Sigma S6639)  
223 + 0.1% tween-20) and once in 2xSSCT 50% formamide (Sigma 47671). For the pre-  
224 hybridization step, CNS were transferred to a new tube containing 2xSSCT 50% formamide  
225 pre-warmed at 92°C and denatured 3min at 92°C. For the hybridization step, the DNA probe  
226 (40-80 ng) was prepared in hybridization buffer (20% dextran sulphate, 2XSSCT, 50%  
227 deionized formamide (Sigma F9037), 0.5 mg ml<sup>-1</sup> salmon sperm DNA) and denatured 3min  
228 at 92°C. Probes were added to the brains samples and hybridize 5min at 92°C followed by  
229 overnight hybridization at 37°C. Samples were washed with 60°C pre-warmed 2XSSCT for  
230 10 min, washed once 5min in 2XSSCT at RT and rinsed in PBS. CNS were mounted in  
231 Mowiol mounting medium and imaged as described above. FISH signals for chromosomes  
232 II and III were quantified in randomly selected CG nuclei using adapted protocols for dots  
233 inside objects detection in 3D images in Volocity 6.3 (Quorum technologies).

234

### 235 **Cortex glial membrane measurements**

236 Each VNC was sampled with six cubes (x = 150 pixels; y = 150 pixels; z = until the neuropile)  
237 devoid of trachea or nerve signal. NSC numbers within each cube were determined  
238 manually, and the CG membrane signal (using Nrv2::GFP as a proxy) was segmented using  
239 a HK-means thresholding (lcy v2.1.4.0, with k = 2). The sum of selected pixels divided by  
240 NSC number defines the ratio of CG membrane to NSCs for each cube. A mean from the  
241 six cubes was calculated for each VNC, giving an estimation of the ratio of CG membrane  
242 per NSC within one brain. The different conditions were analysed via a one-way ANOVA.

243

### 244 **Quantification of individual NSC ensheathing**

245 For each VNC the total number of NSCs was determined through HK-means segmentation

246 in the corresponding channel (Icy v2.1.4.0) and corrected manually. When most of the NSCs  
247 did not appear individually encased (*dup RNAi*; *WASp RNAi*), the remaining number of  
248 NSCs that were still individually ensheathed by CG membrane was counted manually. For  
249 conditions in which most NSCs were still individually ensheathed (control; *mbc RNAi*), we  
250 recorded the number of chambers with more than one NSC, as well as the number of NSCs  
251 within each. This allowed us to subtract the number of NSCs not individually encased from  
252 the total NSC population. Ultimately, the ratio between the number of NSCs individually  
253 ensheathed and the total NSC population defines the percentage of individual NSC  
254 ensheathing. Taking in consideration the non-normal distribution of the control, the  
255 significance of each condition compared to control was then determined through a  
256 generalized linear model (Binomial regression with a Bernoulli distribution).

257

### 258 **Statistics and reproducibility**

259 Statistical tests used for each experiment are stated in the figure legends. Statistical tests  
260 were performed using GraphPad Prism 7.0a.

261

## 1 **Acknowledgments**

2 We thank the Abmayr and Workman labs for the generous gift of the anti-Mbc and anti-Kirre  
3 antibodies; the Basto lab for the DNA FISH probes and the rabbit anti-Dpn; AA Kramerov  
4 for the gift of the anti-Mucin-D antibody; Steven Stowers and Matthias Landgraf for sharing  
5 plasmids for Multisite Gateway cloning; M'hamed Khalil Mazouni for the sequence of the  
6 FRT-STOP-FRT cassette; the Freeman lab for *alrm-GAL4*; James Skeath for the Dpn  
7 plasmid; the Bloomington Drosophila Stock Center and the Vienna Drosophila Research  
8 Center for RNAi lines. We are grateful to Mateusz Trylinski for help with Fiji scripts and  
9 discussions for ploidy count; to Jean-Yves Tinevez (Image Analysis Hub, Institut Pasteur)  
10 and Francis Murphy for help with image processing and FLIP quantification; and to Elise  
11 Jacquemet (Biostatistics Hub, Institut Pasteur) for help with statistical analysis. Julie Marc  
12 generated part of Fig. 1E. Laurence Arbogast built the *cyp4g15-FLP*, *cyp4g15-mtd::Tomato*  
13 and *cyp4g15-FRT-STOP-FRT-LexA* constructs. We thank Jean-René Huynh, Juliette  
14 Mathieu and Romain Levayer for critical reading of the manuscript.

15 This work has been funded by a starting package from Institut Pasteur/LabEx Revive, a  
16 JCJC grant from Agence Nationale de la Recherche (NeuraSteNic, ANR- 17-CE13-0010-  
17 01) and a Projet Fondation ARC from Fondation ARC pour la Recherche sur le Cancer to  
18 PS. MAR has been supported by a LabEx Revive postdoctoral fellowship and BD by an  
19 Amgen fellowship.

## 20 **Author Contributions**

21 MAR performed all experiments, except for: Figure 3f-g, Supp. Figure S3d, Figure 4e, Supp.  
22 Figure S4f, Figure 6a-c and Supp. Figure S6b-c performed by DB; Figure 3c-d, and Supp.  
23 Figure S1d-e performed by BD under the supervision of MAR; and Figures 3e, Fig. 7, Supp.  
24 Figure S3b-c, Supp. Figure S4d-e, and Supp. Figure S7a-b performed by PS. MAR, BD and  
25 PS quantified and analysed the data. MAR and PS wrote the article and made the figures.

## 26 **Declaration of Interests**

27 The authors declare no competing interest.

## 28 **Data availability statement**

29 The datasets generated during and/or analysed during the current study are available from  
30 the corresponding author on reasonable request.

## 1 REFERENCES

- 2 1. Lander, A. D. *et al.* What does the concept of the stem cell niche really mean today?  
3 *BMC Biol.* **10**, 19 (2012).
- 4 2. Faigle, R. & Song, H. Signaling mechanisms regulating adult neural stem cells and  
5 neurogenesis. *Biochim. Biophys. Acta* **1830**, 2435–48 (2013).
- 6 3. Stricker, S. H. & Götz, M. DNA-methylation: Master or slave of neural fate  
7 decisions? *Frontiers in Neuroscience* **12**, (2018).
- 8 4. Morante-Redolat, J. M. & Porlan, E. Neural Stem Cell Regulation by Adhesion  
9 Molecules Within the Subependymal Niche. (2019). doi:10.3389/fcell.2019.00102
- 10 5. Paridaen, J. T. M. L. & Huttner, W. B. Neurogenesis during development of the  
11 vertebrate central nervous system. **15**, 351–364 (2014).
- 12 6. Bond, A. M., Ming, G. L. & Song, H. Adult Mammalian Neural Stem Cells and  
13 Neurogenesis: Five Decades Later. *Cell Stem Cell* **17**, 385–395 (2015).
- 14 7. Götz, M., Nakafuku, M. & Petrik, D. Neurogenesis in the developing and adult  
15 brain—similarities and key differences. *Cold Spring Harb. Perspect. Biol.* **8**, (2016).
- 16 8. Martynoga, B. *et al.* Epigenomic enhancer annotation reveals a key role for NFIX in  
17 neural stem cell quiescence. *Genes Dev.* **27**, 1769–1786 (2013).
- 18 9. Bjornsson, C. S., Apostolopoulou, M., Tian, Y. & Temple, S. It Takes a Village:  
19 Constructing the Neurogenic Niche. *Dev. Cell* **32**, 435–446 (2015).
- 20 10. Silva-Vargas, V., Crouch, E. E. & Doetsch, F. Adult neural stem cells and their niche:  
21 A dynamic duo during homeostasis, regeneration, and aging. *Curr. Opin. Neurobiol.*  
22 **23**, 935–942 (2013).
- 23 11. Conover, J. C. & Todd, K. L. *Neuronal Stem Cell Niches of the Brain. Biology and*  
24 *Engineering of Stem Cell Niches* (2017). doi:10.1016/B978-0-12-802734-9.00006-8
- 25 12. Lacar, B., Young, S. Z., Platel, J.-C. & Bordey, A. Gap junction-mediated calcium  
26 waves define communication networks among murine postnatal neural progenitor  
27 cells. *Eur. J. Neurosci.* **34**, 1895–905 (2011).
- 28 13. Platel, J. C. & Bordey, A. The multifaceted subventricular zone astrocyte: From a  
29 metabolic and pro-neurogenic role to acting as a neural stem cell. *Neuroscience*  
30 **323**, 20–28 (2016).
- 31 14. Obernier, K. & Alvarez-Buylla, A. Neural stem cells: Origin, heterogeneity and  
32 regulation in the adult mammalian brain. *Development (Cambridge)* **146**, (2019).
- 33 15. Conover, J. C. & Todd, K. L. Development and aging of a brain neural stem cell  
34 niche. *Exp. Gerontol.* **94**, 9–13 (2017).
- 35 16. Homem, C. C. F. & Knoblich, J. a. Drosophila neuroblasts: a model for stem cell  
36 biology. *Development* **139**, 4297–310 (2012).
- 37 17. Mira, H. & Morante, J. Neurogenesis From Embryo to Adult – Lessons From Flies  
38 and Mice. *Frontiers in Cell and Developmental Biology* **8**, 533 (2020).
- 39 18. Egger, B., Chell, J. M. & Brand, A. H. Insights into neural stem cell biology from flies.

- 40 *Philos Trans R Soc L. B Biol Sci* **363**, 39–56 (2008).
- 41 19. Otsuki, L. & Brand, A. H. Cell cycle heterogeneity directs the timing of neural stem  
42 cell activation from quiescence. *Science* **360**, 99–102 (2018).
- 43 20. Britton, J. S. & Edgar, B. A. Environmental control of the cell cycle in *Drosophila*:  
44 nutrition activates mitotic and endoreplicative cells by distinct mechanisms.  
45 *Development* **125**, 2149–2158 (1998).
- 46 21. Truman, J. W. & Bate, M. Spatial and temporal patterns of neurogenesis in the  
47 central nervous system of *Drosophila melanogaster*. *Dev. Biol.* **125**, 145–157 (1988).
- 48 22. Chell, J. M. & Brand, A. H. Nutrition-responsive glia control exit of neural stem cells  
49 from quiescence. *Cell* **143**, 1161–73 (2010).
- 50 23. Sousa-Nunes, R., Yee, L. L. & Gould, A. P. Fat cells reactivate quiescent  
51 neuroblasts via TOR and glial insulin relays in *Drosophila*. *Nature* **471**, 508–12  
52 (2011).
- 53 24. Spéder, P. & Brand, A. H. Gap Junction Proteins in the Blood-Brain Barrier Control  
54 Nutrient-Dependent Reactivation of *Drosophila* Neural Stem Cells. *Dev. Cell* 309–  
55 321 (2014). doi:10.1016/j.devcel.2014.05.021
- 56 25. Dumstrei, K., Wang, F. & Hartenstein, V. Role of DE-cadherin in neuroblast  
57 proliferation, neural morphogenesis, and axon tract formation in *Drosophila* larval  
58 brain development. *J. Neurosci.* **23**, 3325–35 (2003).
- 59 26. Pereanu, W., Shy, D. & Hartenstein, V. Morphogenesis and proliferation of the larval  
60 brain glia in *Drosophila*. *Dev. Biol.* **283**, 191–203 (2005).
- 61 27. Spéder, P. & Brand, A. H. Systemic and local cues drive neural stem cell niche  
62 remodelling during neurogenesis in *Drosophila*. *Elife* **7**, 1–16 (2018).
- 63 28. Bailey, A. P. *et al.* Antioxidant Role for Lipid Droplets in a Stem Cell Niche of  
64 *Drosophila*. *Cell* **163**, 340–53 (2015).
- 65 29. Cheng, L. Y. *et al.* Anaplastic lymphoma kinase spares organ growth during nutrient  
66 restriction in *Drosophila*. *Cell* **146**, 435–47 (2011).
- 67 30. Plazaola-Sasieta, H. *et al.* *Drosophila* CIC-a is required in glia of the stem cell niche  
68 for proper neurogenesis and wiring of neural circuits. *Glia* **67**, 2374–2398 (2019).
- 69 31. Dong, Q. *et al.* Glial Hedgehog signalling and lipid metabolism regulate neural stem  
70 cell proliferation in *Drosophila*. *EMBO Rep.* (2021). doi:10.15252/embr.202052130
- 71 32. Coutinho-Budd, J. C., Sheehan, A. E. & Freeman, M. R. The secreted neurotrophin  
72 spätzle 3 promotes glial morphogenesis and supports neuronal survival and  
73 function. *Genes Dev.* **31**, 2023–2038 (2017).
- 74 33. Read, R. D. Pvr receptor tyrosine kinase signaling promotes post-embryonic  
75 morphogenesis, and survival of glia and neural progenitor cells in *drosophila*. *Dev.*  
76 **145**, (2018).
- 77 34. Yuan, X., Sipe, C. W., Suzawa, M., Bland, M. L. & Siegrist, S. E. Dilp-2-mediated  
78 PI3-kinase activation coordinates reactivation of quiescent neuroblasts with growth  
79 of their glial stem cell niche. *PLoS Biol.* **18**, 1–24 (2020).

- 80 35. Kiyoshi, C. & Zhou, M. Astrocyte syncytium: a functional reticular system in the  
81 brain. *Neural Regen. Res.* **14**, 595 (2019).
- 82 36. Kanca, O., Caussin, E., Denes, A. S., Percival-Smith, A. & Affolter, M. Raeppli: a  
83 whole-tissue labeling tool for live imaging of Drosophila development. *Development*  
84 **141**, 472–480 (2014).
- 85 37. Fox, D. T. & Duronio, R. J. Endoreplication and polyploidy: insights into development  
86 and disease. *Development* **140**, 3–12 (2013).
- 87 38. Edgar, B. A., Zielke, N. & Gutierrez, C. Endocycles : a recurrent evolutionary  
88 innovation for post-mitotic cell growth. (2014). doi:10.1038/nrm3756
- 89 39. Orr-Weaver, T. L. When bigger is better: The role of polyploidy in organogenesis.  
90 *Trends Genet.* **31**, 307–315 (2015).
- 91 40. Avet-Rochex, A., Kaul, A. K., Gatt, A. P., McNeill, H. & Bateman, J. M. Concerted  
92 control of gliogenesis by InR/TOR and FGF signalling in the Drosophila post-  
93 embryonic brain. *Development* **139**, 2763–72 (2012).
- 94 41. Zielke, N. *et al.* Fly-FUCCI: A Versatile Tool for Studying Cell Proliferation in  
95 Complex Tissues. *Cell Rep.* **7**, 588–598 (2014).
- 96 42. Piekny, A. J. & Maddox, A. S. The myriad roles of Anillin during cytokinesis.  
97 *Seminars in Cell and Developmental Biology* **21**, 881–891 (2010).
- 98 43. Hu, C. K., Coughlin, M. & Mitchison, T. J. Midbody assembly and its regulation  
99 during cytokinesis. *Mol. Biol. Cell* **23**, 1024–1034 (2012).
- 100 44. Gogendeau, D. *et al.* Aneuploidy causes premature differentiation of neural and  
101 intestinal stem cells. *Nat. Commun.* **6**, 1–15 (2015).
- 102 45. Unhavaithaya, Y. & Orr-Weaver, T. L. Polyploidization of glia in neural development  
103 links tissue growth to blood-brain barrier integrity. *Genes Dev.* **26**, 31–6 (2012).
- 104 46. Hong, A. *et al.* The cyclin-dependent kinase inhibitor Dacapo promotes replication  
105 licensing during Drosophila endocycles. *EMBO J.* **26**, 2071–2082 (2007).
- 106 47. Frawley, L. E. & Orr-Weaver, T. L. Polyploidy. *Current Biology* **25**, R353–R358  
107 (2015).
- 108 48. Øvrebø, J. I. & Edgar, B. A. Polyploidy in tissue homeostasis and regeneration.  
109 *Development (Cambridge)* **145**, (2018).
- 110 49. Lippincott-Schwartz, J., Altan-Bonnet, N. & Patterson, G. H. Photobleaching and  
111 photoactivation: Following protein dynamics in living cells. *Nat. Rev. Mol. Cell Biol.* **4**,  
112 6–14 (2003).
- 113 50. Miyawaki, A. Proteins on the move: Insights gained from fluorescent protein  
114 technologies. *Nat. Rev. Mol. Cell Biol.* **12**, 656–668 (2011).
- 115 51. Peterman, E. & Prekeris, R. The postmitotic midbody: Regulating polarity, stemness,  
116 and proliferation. *Journal of Cell Biology* **218**, 3903–3911 (2019).
- 117 52. Haglund, K., Nezis, I. P. & Stenmark, H. Structure and functions of stable  
118 intercellular bridges formed by incomplete cytokinesis during development.  
119 *Commun. Integr. Biol.* **4**, 1 (2011).



- 120 53. McLean, P. F. & Cooley, L. Bridging the divide: Illuminating the path of intercellular  
121 exchange through ring canals. *Fly (Austin)*. **8**, (2014).
- 122 54. Eikenes, Å. H. *et al.* ALIX and ESCRT-III Coordinately Control Cytokinetic  
123 Abscission during Germline Stem Cell Division In Vivo. *PLOS Genet.* **11**, e1004904  
124 (2015).
- 125 55. Kramerova, I. A. & Kramerov, A. A. Mucinoprotein Is a Universal Constituent of  
126 Stable Intercellular Bridges in *Drosophila melanogaster* Germ Line and Somatic  
127 Cells. *Dev Dyn* **216**, 349–360 (1999).
- 128 56. Adams, R. R., Tavares, A. A. M., Salzberg, A., Bellen, H. J. & Glover, D. M. pavarotti  
129 encodes a kinesin-like protein required to organize the central spindle and  
130 contractile ring for cytokinesis. *Genes Dev.* **12**, 1483–1494 (1998).
- 131 57. Ando, R., Hama, H., Yamamoto-Hino, M., Mizuno, H. & Miyawaki, A. An optical  
132 marker based on the UV-induced green-to-red photoconversion of a fluorescent  
133 protein. *Proc. Natl. Acad. Sci.* **99**, 12651–12656 (2002).
- 134 58. Zito, F., Lampiasi, N., Kireev, I. & Russo, R. United we stand: Adhesion and  
135 molecular mechanisms driving cell fusion across species. *European Journal of Cell  
136 Biology* **95**, 552–562 (2016).
- 137 59. Brukman, N. G., Uygur, B., Podbilewicz, B. & Chernomordik, L. V. How cells fuse.  
138 *Journal of Cell Biology* **218**, 1436–1451 (2019).
- 139 60. Hernández, J. M. & Podbilewicz, B. The hallmarks of cell-cell fusion. *Development*  
140 **144**, 4481–4495 (2017).
- 141 61. Kim, J. H. & Chen, E. H. The fusogenic synapse at a glance. *Journal of cell science*  
142 **132**, (2019).
- 143 62. Bosch, J. A., Tran, N. H. & Hariharan, I. K. CoinFLP: a system for efficient mosaic  
144 screening and for visualizing clonal boundaries in *Drosophila*. *Development* **142**,  
145 597–606 (2015).
- 146 63. Abmayr, S. M. & Pavlath, G. K. Myoblast fusion: Lessons from flies and mice.  
147 *Development* **139**, 641–656 (2012).
- 148 64. Deng, S., Azevedo, M. & Baylies, M. Acting on identity: Myoblast fusion and the  
149 formation of the syncytial muscle fiber. *Seminars in Cell and Developmental Biology*  
150 **72**, 45–55 (2017).
- 151 65. Lee, D. M. & Chen, E. H. *Drosophila* Myoblast Fusion: Invasion and Resistance for  
152 the Ultimate Union. *Annual Review of Genetics* **53**, 67–91 (2019).
- 153 66. Richardson, B. E., Nowak, S. J. & Baylies, M. K. Myoblast Fusion in Fly and  
154 Vertebrates: New Genes, New Processes and New Perspectives. *Traffic* **9**, 1050  
155 (2008).
- 156 67. Haralalka, S. *et al.* Asymmetric Mbc, active Rac1 and F-actin foci in the  
157 fusioncompetent myoblasts during myoblast fusion in *Drosophila*. *Development* **138**,  
158 1551–1562 (2011).
- 159 68. Venken, K. J. T. *et al.* MiMIC: A highly versatile transposon insertion resource for  
160 engineering *Drosophila melanogaster* genes. *Nat. Methods* **8**, 737–747 (2011).

- 161 69. Nagarkar-Jaiswal, S. *et al.* A library of MiMICs allows tagging of genes and  
162 reversible, spatial and temporal knockdown of proteins in *Drosophila*. *Elife* **2015**, 1–  
163 28 (2015).
- 164 70. Bosch, J. A., Sumabat, T. M. & Hariharan, I. K. Persistence of RNAi-mediated  
165 knockdown in *Drosophila* complicates mosaic analysis yet enables highly sensitive  
166 lineage tracing. *Genetics* **203**, 109–118 (2016).
- 167 71. Evans, C. J. *et al.* G-TRACE: Rapid Gal4-based cell lineage analysis in *Drosophila*.  
168 *Nat. Methods* **6**, 603–605 (2009).
- 169 72. Spéder, P. & Brand, A. H. Systemic and local cues drive neural stem cell niche  
170 remodelling during neurogenesis in *Drosophila*. *Elife* **7**, e30413 (2018).
- 171 73. Zielke, N., Edgar, B. A. & DePamphilis, M. L. Endoreplication. *Cold Spring Harbor*  
172 *Perspectives in Biology* **5**, (2013).
- 173 74. Greenbaum, M. P., Iwamori, T., Buchold, G. M. & Matzuk, M. M. Germ cell  
174 intercellular bridges. *Cold Spring Harb. Perspect. Biol.* **3**, 1–18 (2011).
- 175 75. Huynh, J.-R. Fusome as a Cell-Cell Communication Channel of *Drosophila* Ovarian  
176 Cyst. (2013).
- 177 76. Willkomm, L. & Bloch, W. State of the art in cell-cell fusion. in *Cell Fusion:*  
178 *Overviews and Methods: Second Edition* **1313**, 1–19 (Springer New York, 2015).
- 179 77. Peterson, N. G. *et al.* Cytoplasmic sharing through apical membrane remodeling.  
180 *Elife* **9**, 1–50 (2020).
- 181 78. Giaume, C., Koulakoff, A., Roux, L., Holcman, D. & Rouach, N. Astroglial networks:  
182 a step further in neuroglial and gliovascular interactions. *Nat. Rev. Neurosci.* **11**, 87–  
183 99 (2010).
- 184 79. Kiyoshi, C. M. & Zhou, M. Astrocyte syncytium: A functional reticular system in the  
185 brain. *Neural Regeneration Research* **14**, 595–596 (2019).
- 186 80. Baldwin, K. T. *et al.* HepaCAM controls astrocyte self-organization and coupling.  
187 *Neuron* **109**, 2427-2442.e10 (2021).
- 188 81. Zhou, B., Zuo, Y. & Jiang, R. Astrocyte morphology: Diversity, plasticity, and role in  
189 neurological diseases. *CNS Neurosci. Ther.* **25**, 665 (2019).
- 190 82. Dias, M. C., Mapunda, J. A., Vladymyrov, M. & Engelhardt, B. Structure and  
191 junctional complexes of endothelial, epithelial and glial brain barriers. *International*  
192 *Journal of Molecular Sciences* **20**, 5372 (2019).
- 193 83. Doherty, J., Logan, M. a, Taşdemir, O. E. & Freeman, M. R. Ensheathing glia  
194 function as phagocytes in the adult *Drosophila* brain. *J. Neurosci.* **29**, 4768–81  
195 (2009).
- 196 84. Bellaïche, Y., Gho, M., Kaltschmidt, J. A., Brand, A. H. & Schweisguth, F. Frizzled  
197 regulates localization of cell-fate determinants and mitotic spindle rotation during  
198 asymmetric cell division. *Nat. Cell Biol.* **3**, 50–57 (2001).
- 199 85. Langevin, J. *et al.* Lethal giant larvae controls the localization of Notch-signaling  
200 regulators Numb, neuralized, and Sanpodo in *Drosophila* sensory-organ precursor

- 201 cells. *Curr. Biol.* **15**, 955–962 (2005).
- 202 86. Minestrini, G., Máthé, E. & Glover, D. M. Domains of the pavarotti kinesin-like  
203 protein that direct its subcellular distribution: Effects of mislocalisation on the tubulin  
204 and actin cytoskeleton during *Drosophila* oogenesis. *J. Cell Sci.* **115**, 725–736  
205 (2002).
- 206 87. Weinkove, D., Neufeld, T. P., Twardzik, T., Waterfield, M. D. & Leever, S. J.  
207 Regulation of imaginal disc cell size, cell number and organ size by *Drosophila* class  
208 I(A) phosphoinositide 3-kinase and its adaptor. *Curr. Biol.* **9**, 1019–1029 (1999).
- 209 88. Pfeiffer, B. D. *et al.* Tools for neuroanatomy and neurogenetics in *Drosophila*. *Proc.*  
210 *Natl. Acad. Sci. U. S. A.* **105**, 9715–20 (2008).
- 211 89. Böttcher, R. *et al.* Efficient chromosomal gene modification with CRISPR/cas9 and  
212 PCR-based homologous recombination donors in cultured *Drosophila* cells. *Nucleic*  
213 *Acids Res.* **42**, (2014).
- 214 90. Petersen, L. K. & Stowers, R. S. A Gateway MultiSite recombination cloning toolkit.  
215 *PLoS One* **6**, e24531 (2011).
- 216 91. Benmimoun, B. *et al.* An original infection model identifies host lipoprotein import as  
217 a route for blood-brain barrier crossing. *Nat. Commun.* **11**, 1–18 (2020).
- 218 92. Erickson, M. R. S., Galletta, B. J. & Abmayr, S. M. *Drosophila* myoblast city encodes  
219 a conserved protein that is essential for myoblast fusion, dorsal closure, and  
220 cytoskeletal organization. *J. Cell Biol.* **138**, 589–603 (1997).
- 221 93. Galletta, B. J., Chakravarti, M., Banerjee, R. & Abmayr, S. M. SNS: adhesive  
222 properties, localization requirements and ectodomain dependence in S2 cells and  
223 embryonic myoblasts. *Mech. Dev.* **121**, 1455–1468 (2004).
- 224 94. AA, K. *et al.* Mucin-type glycoprotein from *Drosophila melanogaster* embryonic cells:  
225 characterization of carbohydrate component. *FEBS Lett.* **378**, 213–218 (1996).
- 226

1 **Figure legends Rujano et al.**

2

3 **Figure 1: Growth of individual CG cells results in a tiled organization of the cortex**  
4 **glia network**

5 a) Schematic of the *Drosophila* NSC niche depicting the blood brain barrier (BBB), which is  
6 made by the perineurial glia (PG, red) and subperineurial glia (SPG, orange), the cortex glia  
7 (CG, green), neural stem cells (NSC, grey), ganglion mother cells/intermediate progenitors  
8 (gmc/inp, blue) and neurons (N, magenta).

9 b) Ventral region in the larval ventral nerve cord (VNC) at ALH72 (at 25°C) labelled with  
10 markers for the CG membranes (*Nrv2::GFP*, green), CG nuclei (*CG > Hist::RFP*, yellow),  
11 NSC (anti-Dpn, grey) and neurons (anti-ELAV, magenta). The right panel shows the CG  
12 membrane separately. Scale bar: 10 µm.

13 c) Timeline of neurogenesis (top scheme) and assessment of CG network organization  
14 during larval development in the entire CNS at ALH0, ALH24, ALH48, ALH72 and ALH96  
15 (at 25°C). Two main neurogenic regions are the central brain (CB), comprising two  
16 hemispheres, and the ventral nerve cord (VNC). CG membranes are labelled with  
17 *Nrv2::GFP* (ALH0, ALH72) and *CG>CD8::GFP* (ALH24, ALH48 and ALH96). Scale bar: 50  
18 µm.

19 d) Progressive growth and adaptation of the CG network to NSC lineages in the VNC  
20 visualized at ALH0, ALH24, ALH48, ALH72 and ALH96 (at 25°C). CG membranes are  
21 labelled with *CG>CD8::GFP* (ALH0) and *Nrv2::GFP* (ALH24, ALH48, ALH72 and ALH96).  
22 NSCs are labelled with Dpn (grey). Scale bars: 20 µm.

23 e) Analysis of individual CG growth over time by multicolour lineage tracing using Raeppli.  
24 Images were acquired at ALH0, ALH24, ALH48, ALH72 and ALH96 (at 25°C). Constitutively  
25 expressed Cyp-Flp was used for the visualization of clones at ALH0. Hs-Flp and heat shock  
26 induction at 37°C at ALH0 was used for the visualization of clones at ALH24, ALH48, ALH72  
27 and ALH96. Scale bars: 20 µm.

28 f) Volume quantification of Raeppli clones in the VNC at ALH0 (n=7), ALH24 (n=25), ALH48  
29 (n=25), ALH72 (n=32) and ALH96 (n=30). n, number of clones. Results are presented as  
30 box and whisker plots. Whiskers mark the minimum and maximum, the box includes the  
31 25th–75th percentile, and the line in the box is the median. Individual values are  
32 superimposed. Data statistics: ordinary one-way ANOVA with a Tukey's multiple  
33 comparison test.

34 g) Individual TagBFP (cyan) and E2-orange (yellow) Raeppli clones encasing several NSC  
35 labelled with Dpn (magenta). Scale bar: 20  $\mu$ m.

36 h) Number of NSCs per CG clone quantification in the central brain (CB) and the VNC at  
37 ALH48 (n=53 and 51 CB and VNC, respectively), ALH72 (n=64 and 48 CB and VNC,  
38 respectively) and ALH96 (n=46 and 42 CB and VNC, respectively). n, number of clones.  
39 Bars represent the mean and the error bars are the standard deviation. Data statistics: two-  
40 way ANOVA with a Dunnett's multiple comparison test.

41

## 42 **Figure 2: CG cells exhibit multiple cell cycle strategies**

43 a) G1 (green), S (magenta) and G2/M (grey) phases of the cell cycle along CG network  
44 detected with Fly-FUCCI. FUCCI sensors are labelled in magenta (CycB) and green (E2F1).  
45 Scale bar: 50  $\mu$ m.

46 b) Quantification of cell cycle phase distribution in CG by Fly-FUCCI at ALH0 (n=11), ALH24  
47 (n=15), ALH48 (n=23), ALH72 (n=13) and ALH96 (n=6) (at 25°C). n, number of CNS  
48 analysed. Stacked bars represent the percentage of cells in each phase.

49 c) Representative image of a larval VNC expressing Hist::RFP in CG (magenta) and stained  
50 with phospho-histone H3 antibody (pHistone-3, green) to visualise mitotic CG nuclei (grey).  
51 Scale bar: 20  $\mu$ m. Higher magnification of separate channels from the region inside the  
52 dashed rectangle are shown on the right.

53 d) CG mitotic index quantification in larval CNS at ALH0 (n=15), ALH24 (n=26), ALH48  
54 (n=27), ALH72 (n=13) and ALH96 (n=13) (at 25°C). n, number of CNS analysed. Results  
55 are presented as box and whisker plots. Whiskers mark the minimum and maximum, the  
56 box includes the 25th–75th percentile, and the line in the box is the median. Individual values  
57 are superimposed. Data statistics: ordinary one-way ANOVA with a Tukey's multiple  
58 comparison test.

59 e) Still images of a time-lapse movie (Movie S1) of mitotic CG expressing *Hist::RFP* (grey).  
60 Scale bar: 5  $\mu$ m.

61 f) Expression of *mRFP::scra* (magenta) in CG to monitor contractile ring and midbody  
62 formation. CG membranes and nuclei are labelled with *Nrv2::GFP* (green) and *Hist::IFP*  
63 (blue) respectively. Arrows indicate midbodies/contractile ring. Scale bar: 10  $\mu$ m. Higher  
64 magnifications of *mRFP::scra* and *Nrv2::GFP* separate channels from the region  
65 demarcated by the dashed rectangle are shown on the right.

66 g) Quantification of the number of midbodies per 100 CG cells in larval VNCs at ALH24  
67 (n=4), ALH48 (n=8), ALH72 (n=4) and ALH96 (n=4) (at 25°C). n, number of VNCs analysed.

68 Results are presented as box and whisker plots. Whiskers mark the minimum and maximum,  
69 the box includes the 25th–75th percentile, and the line in the box is the median. Individual  
70 values are superimposed. Data statistics: ordinary one-way ANOVA with a Tukey’s multiple  
71 comparison test.

72 h) Fluorescence in situ hybridization (FISH) using probes for chromosomes 2 (Chr2, cyan)  
73 and 3 (Chr3, red) in CNS expressing *nls::LacZ* (yellow) to mark the CG nuclei. 2n (upper)  
74 and >2n (bottom) nuclei are shown. Scale bar: 5  $\mu\text{m}$ .

75 i) Quantification of FISH signals in CG nuclei at ALH0 (n=95), ALH24 (n=189), ALH48  
76 (n=140), ALH72 (n=70) and ALH96 (n=108). N, number of CG cells analysed. Results are  
77 presented as box and whisker plots. Whiskers mark the minimum and maximum, the box  
78 includes the 25th–75th percentile, and the line in the box is the median. Individual values  
79 are superimposed. Data statistics: two-way ANOVA with a Dunnett’s multiple comparison  
80 test.

81 j, k) CG nuclei (j, *CG > Hist::RFP*) and CG network (k, *Nrv2::GFP*) in control CNS and in  
82 CNS where CG-specific downregulation of doubled-parked (*dup RNAi*) was induced. Scale  
83 bar: 20  $\mu\text{m}$ .

84 l) Still images of a time-lapse movie (Movie S3) of a CG expressing *Hist::RFP* (grey)  
85 undergoing endomitosis. Scale bar: 5  $\mu\text{m}$ .

86

### 87 **Figure 3: CG glia are syncytial units**

88 a) Still images of a time-lapse movie (Movie S4) of two CG expressing *Hist::RFP* (grey)  
89 undergoing mitosis synchronously. Scale bar: 5  $\mu\text{m}$ .

90 b) Synchronous behaviour of CG observed with Fly-FUCCI (left panels), where clusters of  
91 CG are found at the same cell cycle phase, and with anillin staining that also show clusters  
92 of CG undergoing mitosis (\*) and cytokinesis (\*\*) at the same time (right panels).  
93 Synchronous clusters are delineated with dashed lines. FUCCI sensors are labelled in  
94 magenta (CycB) and green (E2F1). Anillin is labelled with mRFP::scra (magenta) and CG  
95 nuclei with *Hist::IFP* (blue). Separate channels are shown in the bottom. Scale bars: 20  $\mu\text{m}$ .

96 c) Sharing of cytoplasmic material between CG assessed by Fluorescence Loss In  
97 Photobleaching (FLIP) of cytosolic GFP (green). Top panels depict a region in the VNC  
98 before (pre-bleach) and after bleaching (post-bleach). CG nuclei are labelled with *Hist::RFP*  
99 (magenta). Bottom panels show intermediate time points (GFP only, pseudocolored with  
100 thermal LUT) during continuous photobleaching. Bleached area is delineated by the dashed  
101 square. Scale bars: 20  $\mu\text{m}$ .

102 d) Quantification of the number of CG nuclei in the bleached region after FLIP at ALH24  
103 (n=23), ALH48 (n=16), ALH72 (n=8) and ALH96 (n=8). n, number of FLIP experiments  
104 analysed. Results are presented as box and whisker plots. Whiskers mark the minimum and  
105 maximum, the box includes the 25th–75th percentile, and the line in the box is the median.  
106 Individual values are superimposed. Data statistics: two-way ANOVA with a Dunnett's  
107 multiple comparison test.

108 e) Anillin (mRFP::scra, magenta ) is found in punctated structures enriched in Alix  
109 (*CG>UAS-GFP::Alix*, green) and Mucin-D (anti-Mucin-D, cyan), two known components of  
110 midbodies and intercellular bridges. CG nuclei are stained with His::IFP (*CG>His::IFP*, grey).  
111 Scale bar: 5  $\mu\text{m}$ .

112 f) CG connection via the midbodies marked by anillin (mRFP::scra, magenta) assessed by  
113 photoconversion of cytosolic Kaede from GFP (green) to RFP (magenta, cKaede). Top  
114 panels depict a region in the VNC before (pre-photoconversion) and after photoconversion  
115 (post- photoconversion). The photoconverted area is delineated by the white dashed square  
116 and an isolated midbody (clear blue inset) is shown in between CG cells. Bottom panels  
117 show intermediate time points (RFP/cKaede only, pseudocolored with thermal LUT) during  
118 continuous photoconversion. Scale bars: 10  $\mu\text{m}$ .

119 g) Selected slices (z11, left panel and z40, right panel) from Z-stacks before and after  
120 photoconversion shown in f) are displayed next to each other. The cKaede signal overlaps  
121 with several midbodies-like (mRFP::scra puncta, dashed white circles) throughout the Z-  
122 stack, showing that CG units are rich in intercellular bridges. Scale bar: 10  $\mu\text{m}$ . z-step is  
123 0.50  $\mu\text{m}$ .

124

#### 125 **Figure 4: CG units can undergo cellular fusion**

126 a) Restricted areas of colour overlapping in membrane targeted CG Raeppli clones at  
127 ALH72 (dashed lines). Scale bar: 50  $\mu\text{m}$ .

128 b) Cytoplasmic exchange between CG units assessed in CoinFLP clones (methods and  
129 Supp. Fig. S4c). Clones expressing either cytosolic GFP (green) or cytosolic RFP  
130 (magenta), show regions of partial overlapping (dashed lines). Scale bar: 20  $\mu\text{m}$ .

131 c) Quantification of areas of partial (grey-hashed green), total (grey) or no overlap (green)  
132 between clones expressing cytosolic GFP and RFP. Due to the bias in the CoinFLP system  
133 that generates very large connected clones in one colour (RFP in our case) and small sparse  
134 clones in the other colour (GFP), only green clones were taken in account for the no overlap  
135 category. Stacked bars represent the mean and error bars represent the SEM. Data

136 statistics: two-way ANOVA with a Šídák's multiple comparisons test. No statistically  
137 significant differences were found.

138 d) Mitochondrial exchange between CG units assessed in Coin-FLP clones (methods and  
139 Supp. Fig. S4c). Clones expressing mitochondrial markers Mito::GFP (green) or Mito::RFP  
140 (magenta), show regions of partial overlap (dashed lines). Scale bar: 10  $\mu$ m.

141 e) Continuity between CG units due to cellular fusion was assessed by photoconversion of  
142 cytosolic Kaede expressed in the CG in combination with early induction of multicolour  
143 labelling of CG nuclei (Raeppli-NLS) that leads to clonal labelling of the nuclei in CG units.  
144 Iterative photoconversion was performed in a small area (dashed rectangle) within a  
145 Raeppli-NLS CG clone containing nuclei of one colour. Top panels depict the assessed area  
146 before (pre-photoconversion) and after photoconversion (post-photoconversion). Bottom  
147 panels show the converted form (cKaede) only, pseudocolored with thermal LUT) before  
148 and after photoconversion, with nuclei represented by black discs outlined with the  
149 respective Raeppli colour. In total, three different colours of nuclei are joined by the cKaede  
150 signal. Scale bars: 10  $\mu$ m.

151

## 152 **Figure 5: Cell fusion between CG units is atypical**

153 a-e) Propagation of information/signals between fused areas was assessed by FLIP in  
154 clones generated by CoinFLP with cytosolic GFP (green) and RFP (magenta) in CG. A GFP  
155 expressing clone with areas of partial and no overlap with an RFP expressing clone was  
156 selected. For each experiment, continuous bleaching was performed in a small area (dashed  
157 rectangle, pink for GFP and yellow for mCherry), and loss of fluorescence in different regions  
158 was measured (see Supp. Fig. S5-1c for values). Top panels depict the assessed area  
159 before (pre-bleach) and after bleaching (post-bleach). Bottom panels show the bleached  
160 channel only, pseudocolored with thermal LUT. Scale bars: 10  $\mu$ m. a) Continuous bleaching  
161 of GFP in the non-overlapping part of the GFP clone (GFP zone). b) Continuous bleaching  
162 of mCherry in the overlapping part of the GFP clone with high GFP intensities ( $H_{GFP}$   
163 subzone). c) Continuous bleaching of mCherry in the overlapping part of the GFP clone with  
164 lower GFP intensities ( $L_{GFP}$  subzone). d) Continuous bleaching of GFP overlapping part of  
165 the GFP clone with lower GFP intensities ( $L_{GFP}$  subzone). e) Schematics of the findings from  
166 5a-d. Left panel represents the outcome of fusion between CG units from experiments 5a-  
167 d, with N describing the unknown number of original mCherry cells. As we cannot know the  
168 number of mCherry original cells in the movie area, we cannot distinguish between whether  
169 i) the GFP clone fused with two mCherry cells to independently generate  $L_{GFP}$  and  $H_{GFP}$ ; or  
170 ii) the GFP clone fused with one mCherry cell (mCherry 2), forming a mixed compartment



171 that further splits. Right panel illustrates the different zones distinguished by the overlap  
172 between the GFP and the mCherry signals, as well as the diffusion barriers existing at the  
173 time of recording. Solid lines indicate full diffusion barriers and dashed lines the existence  
174 of compartmental continuity, the extent of which is indicated by the interval between the  
175 dots.

176 f) Still images of a time-lapse movie (Movie S11) of the region of interaction between two  
177 neighbouring CG clones generated with CoinFLP and expressing either cytosolic GFP or  
178 RFP, at ALH48. Scale bar: 5  $\mu\text{m}$ .

179

### 180 **Figure 6: Cell fusion between CG units is regulated by canonical fusion molecules**

181 a) Expression of membrane targeted GFP (*mCD8::GFP*, green) and nuclear RFP  
182 (*Hist::RFP*, magenta) using the trojan line *mbc-Gal4* to assess the expression of *mbc* in CG.  
183 Glia nuclei were labelled with Repo (blue) and NSC were labelled with Dpn (gray). Scale  
184 bar: 20  $\mu\text{m}$ .

185 b) Endogenous expression of Mbc in the CNS assessed by immunostaining with Mbc  
186 antibody (magenta) in the VNC. CG membranes are labelled with *Nvr2::GFP* (green), NSC  
187 are labelled with Dpn (grey) and Dapi (blue) was used to visualise all nuclei. Upper panels  
188 show the expression in control CNS. Lower panels show the expression after RNAi  
189 knockdown of *mbc*. Scale bar: 10  $\mu\text{m}$ .

190 c) Endogenous expression of Kirre in the CNS assessed by immunostaining with Kirre  
191 antibody (magenta) in the VNC. CG membranes are labelled with *Nvr2::GFP* (green), NSC  
192 are labelled with Dpn (grey) and Dapi (blue) was used to visualise all nuclei. Upper panels  
193 show the expression in control CNS. Lower panels show the expression after RNAi mediated  
194 down regulation of *kirre*. Scale bar: 10  $\mu\text{m}$ .

195 d) RNAi knockdown of cell-cell fusion related genes in multicoloured labelled CG (Raeppli  
196 CAAX) in the VNC. Control (no RNAi), *WASp*, *mbc*, *hbs*, *rst* and *sns* RNAi-knockdowns are  
197 shown. RNAi expression was induced at ALH0, larvae were maintained at 29°C and  
198 dissected at ALH72. Scale bars: 50  $\mu\text{m}$ .

199 e, f) Quantification of the number of fusion events per clone (e) and number of clones (f) for  
200 multicoloured labelled Raeppli CG clones at ALH72 (at 29°C) after knockdown of fusion  
201 genes in CG. Results are presented as box and whisker plots. Whiskers mark the minimum  
202 and maximum, the box includes the 25th–75th percentile. Individual values are  
203 superimposed. Data statistics: one-way ANOVA with a Kruskal–Wallis multiple comparison  
204 test.

205 **Figure 7: Growth and cell fusion of CG units are required for correct CG architecture**  
206 a) Effect of dysregulation of genes involved in endoreplication and atypical fusion on overall  
207 CG network architecture. RNAi knockdown of *dup* (DNA replication), *WASp* and *mbc* (cell-  
208 cell fusion) are shown (all at ALH72 at 29°C). CG network architecture is visualised with  
209 *Nrv2::GFP* and NSCs are stained with anti-Deadpan (Dpn). Yellow arrows point towards  
210 ensheathing of several NSCs (instead of one only) in a chamber of CG membrane. Pink  
211 arrows indicate local accumulation of CG membrane. Scale bars: 10  $\mu$ m.  
212 b) Quantification of the average quantity of CG membrane per NSC in the genetic conditions  
213 shown in a). See Methods for details. Results are presented as box and whisker plots.  
214 Whiskers mark the minimum and maximum, the box includes the 25th–75th percentile.  
215 Individual values are superimposed. Data statistics: one-way ANOVA with a Tukey's  
216 multiple comparison test.  
217 c) Quantification of the percentage of NSCs individually ensheathed by CG membrane. See  
218 Methods for details. Results are presented as box and whisker plots. Whiskers mark the  
219 minimum and maximum, the box includes the 25th–75th percentile. Individual values are  
220 superimposed. Data statistics: generalized linear model (Binomial regression with a  
221 Bernoulli distribution).  
222 d) Distribution of the number of NSCs per chamber in non-individual chambers for *mbc RNAi*  
223 in CG. Results are presented as a pie chart.

224  
225 **Figure 8: Model of CG morphogenesis along developmental time and NSC behaviour**  
226 Individual CG cells grow to tile the CNS, undergoing both endoreplicative and mitotic events  
227 that create multinucleated and polyploid cells. These syncytial units are also able to fuse  
228 with each other, exchanging subcellular compartments including cytoplasm, membrane and  
229 organelles. This fusion appears partial in space and dynamic in time, and can lead to sharp  
230 boundaries between connected and unconnected CG domains. Each CG unit is able to  
231 enwrap several NSC lineages. Polyploid nuclei are shown in darker blue.

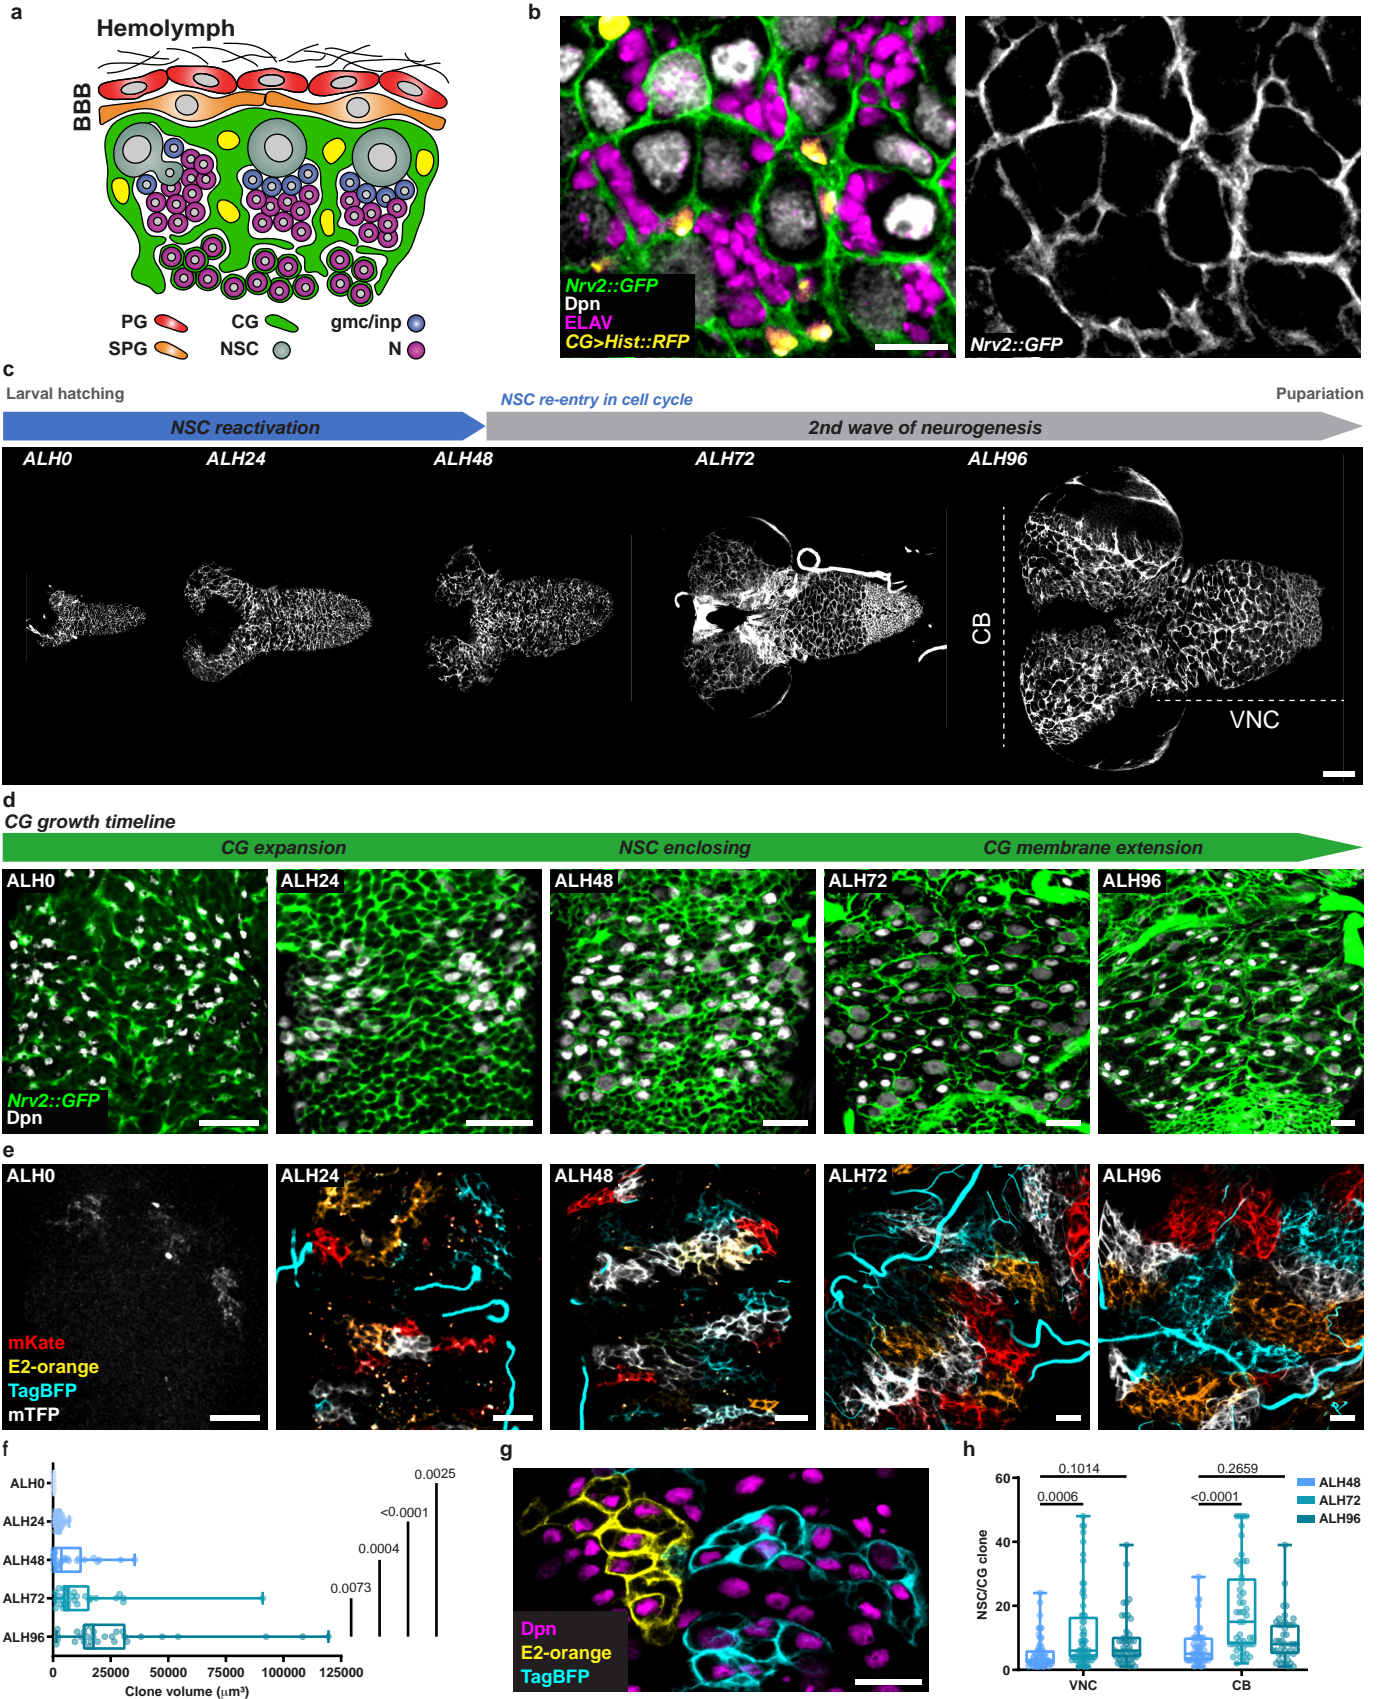

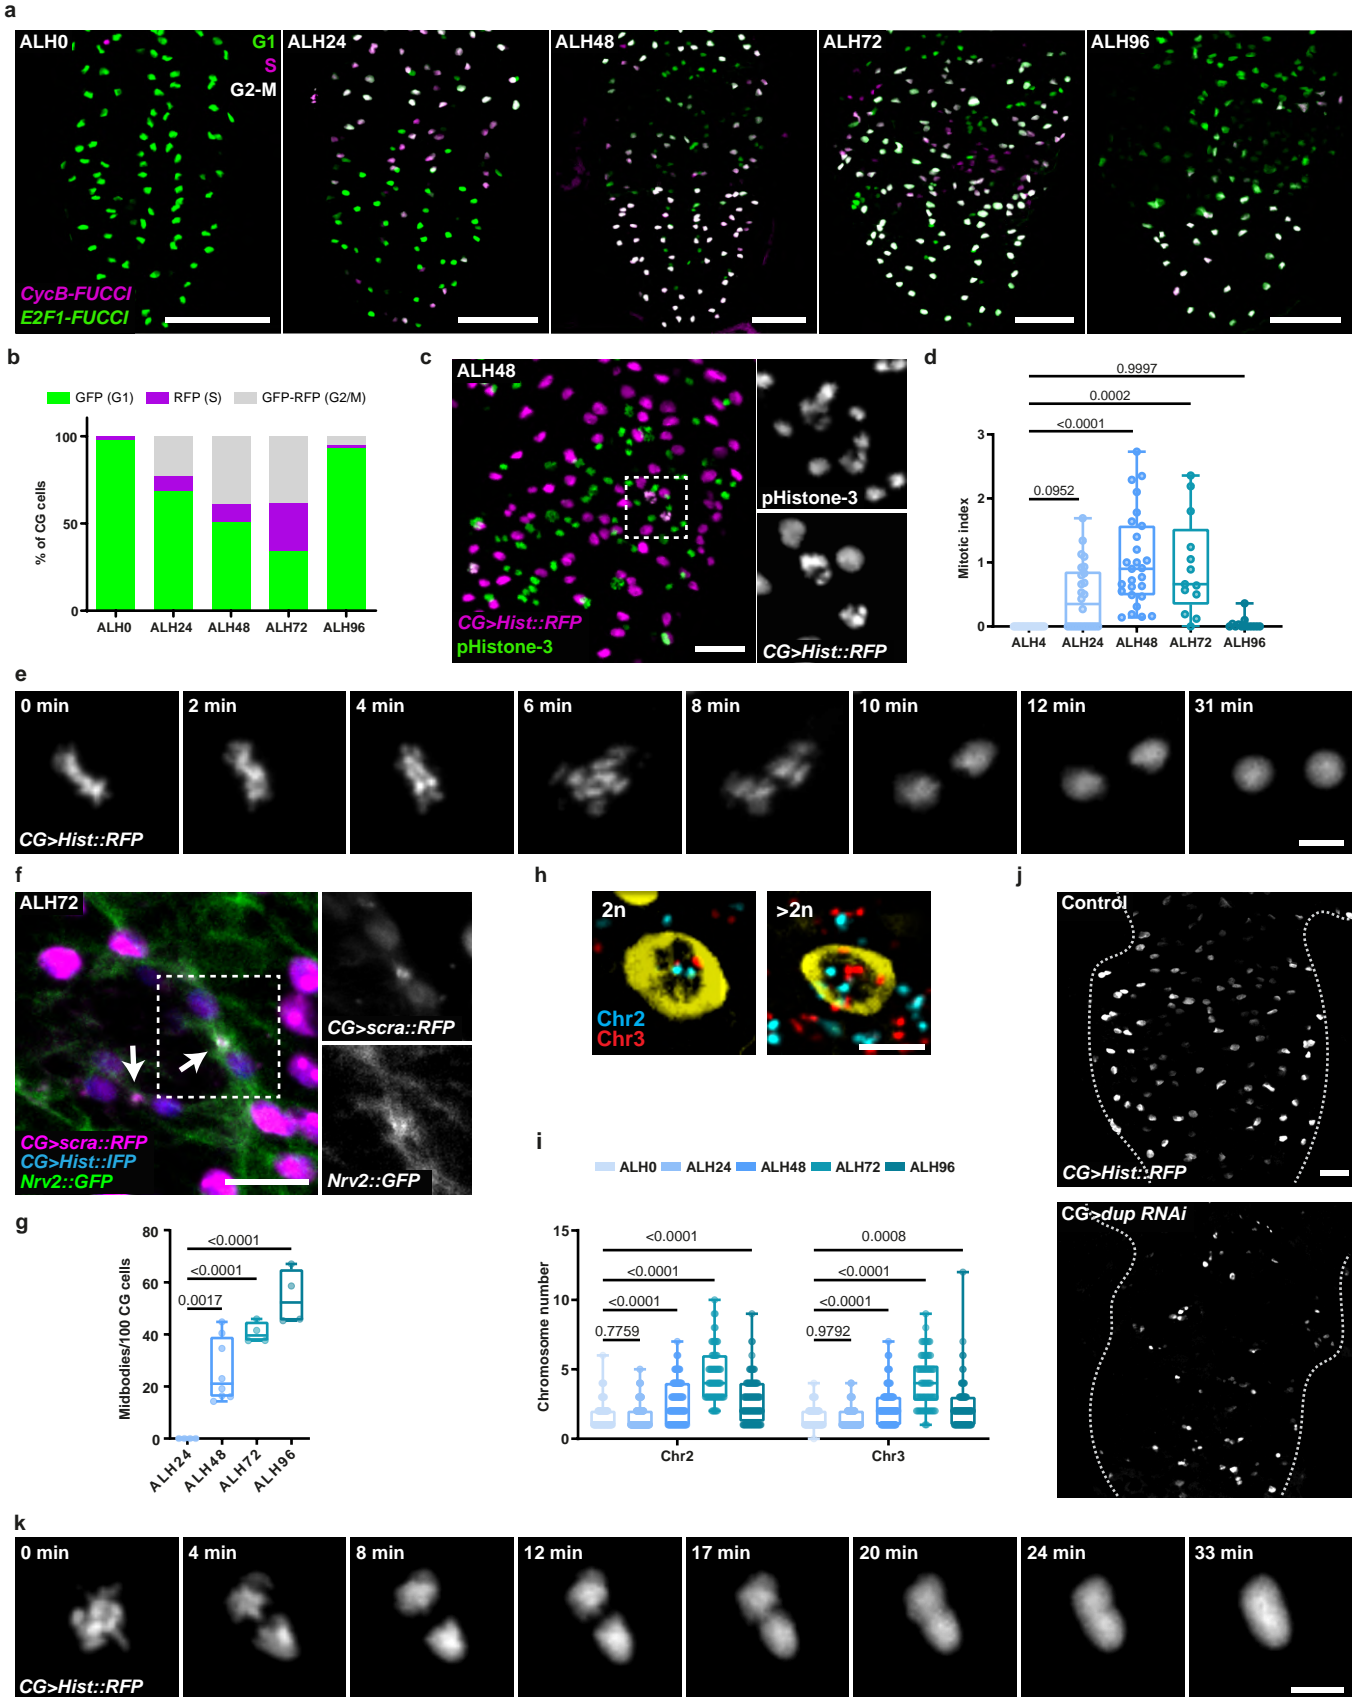

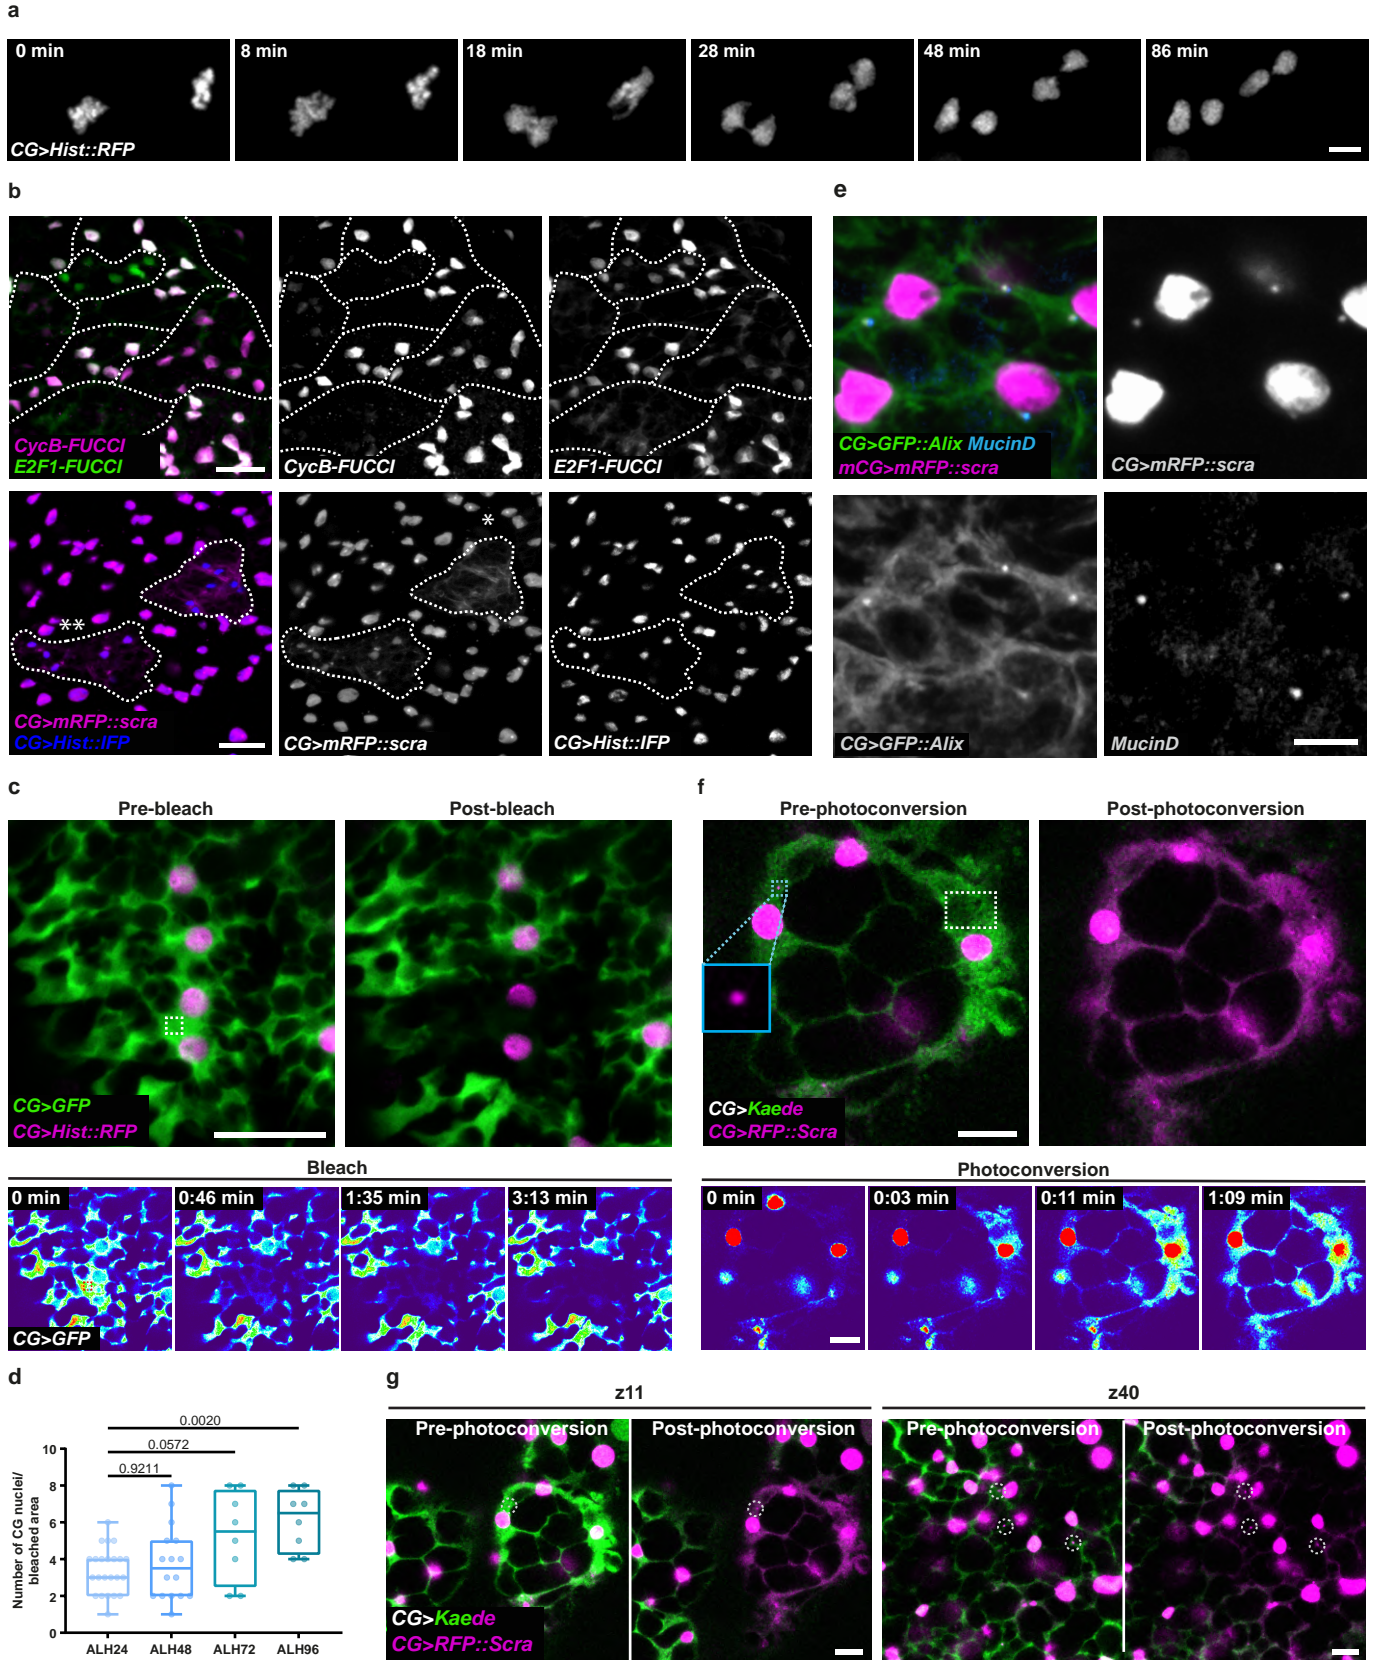

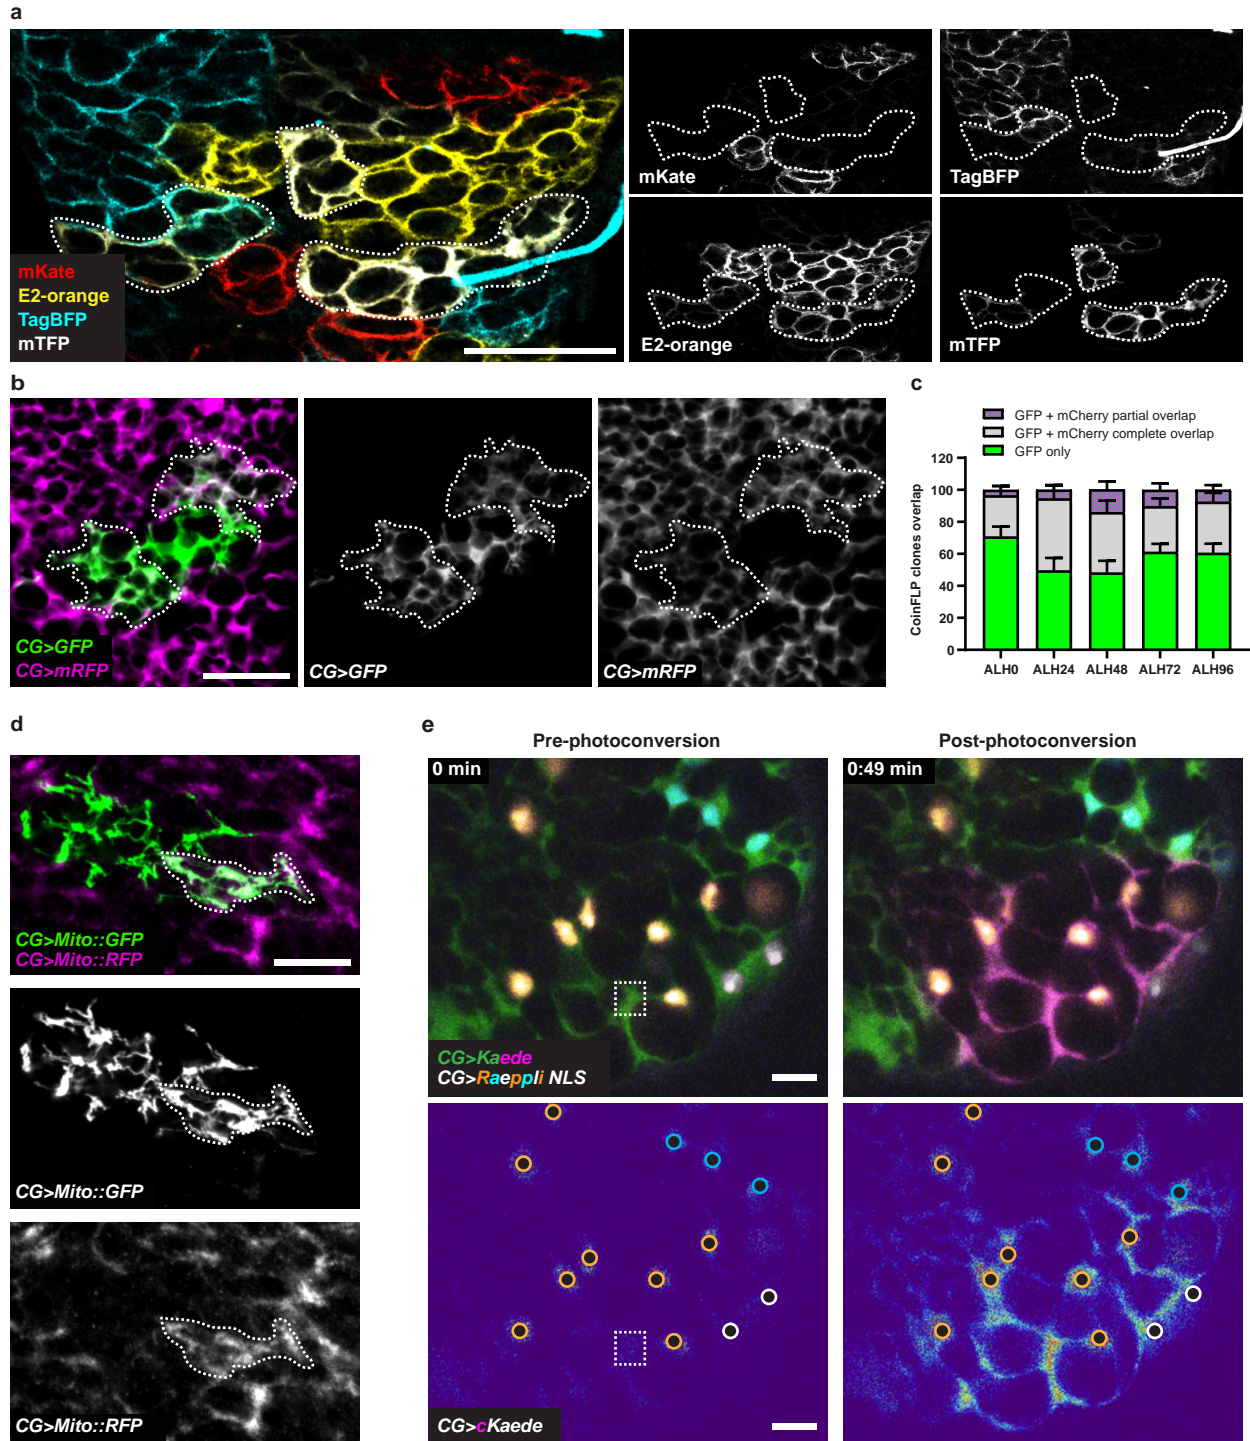

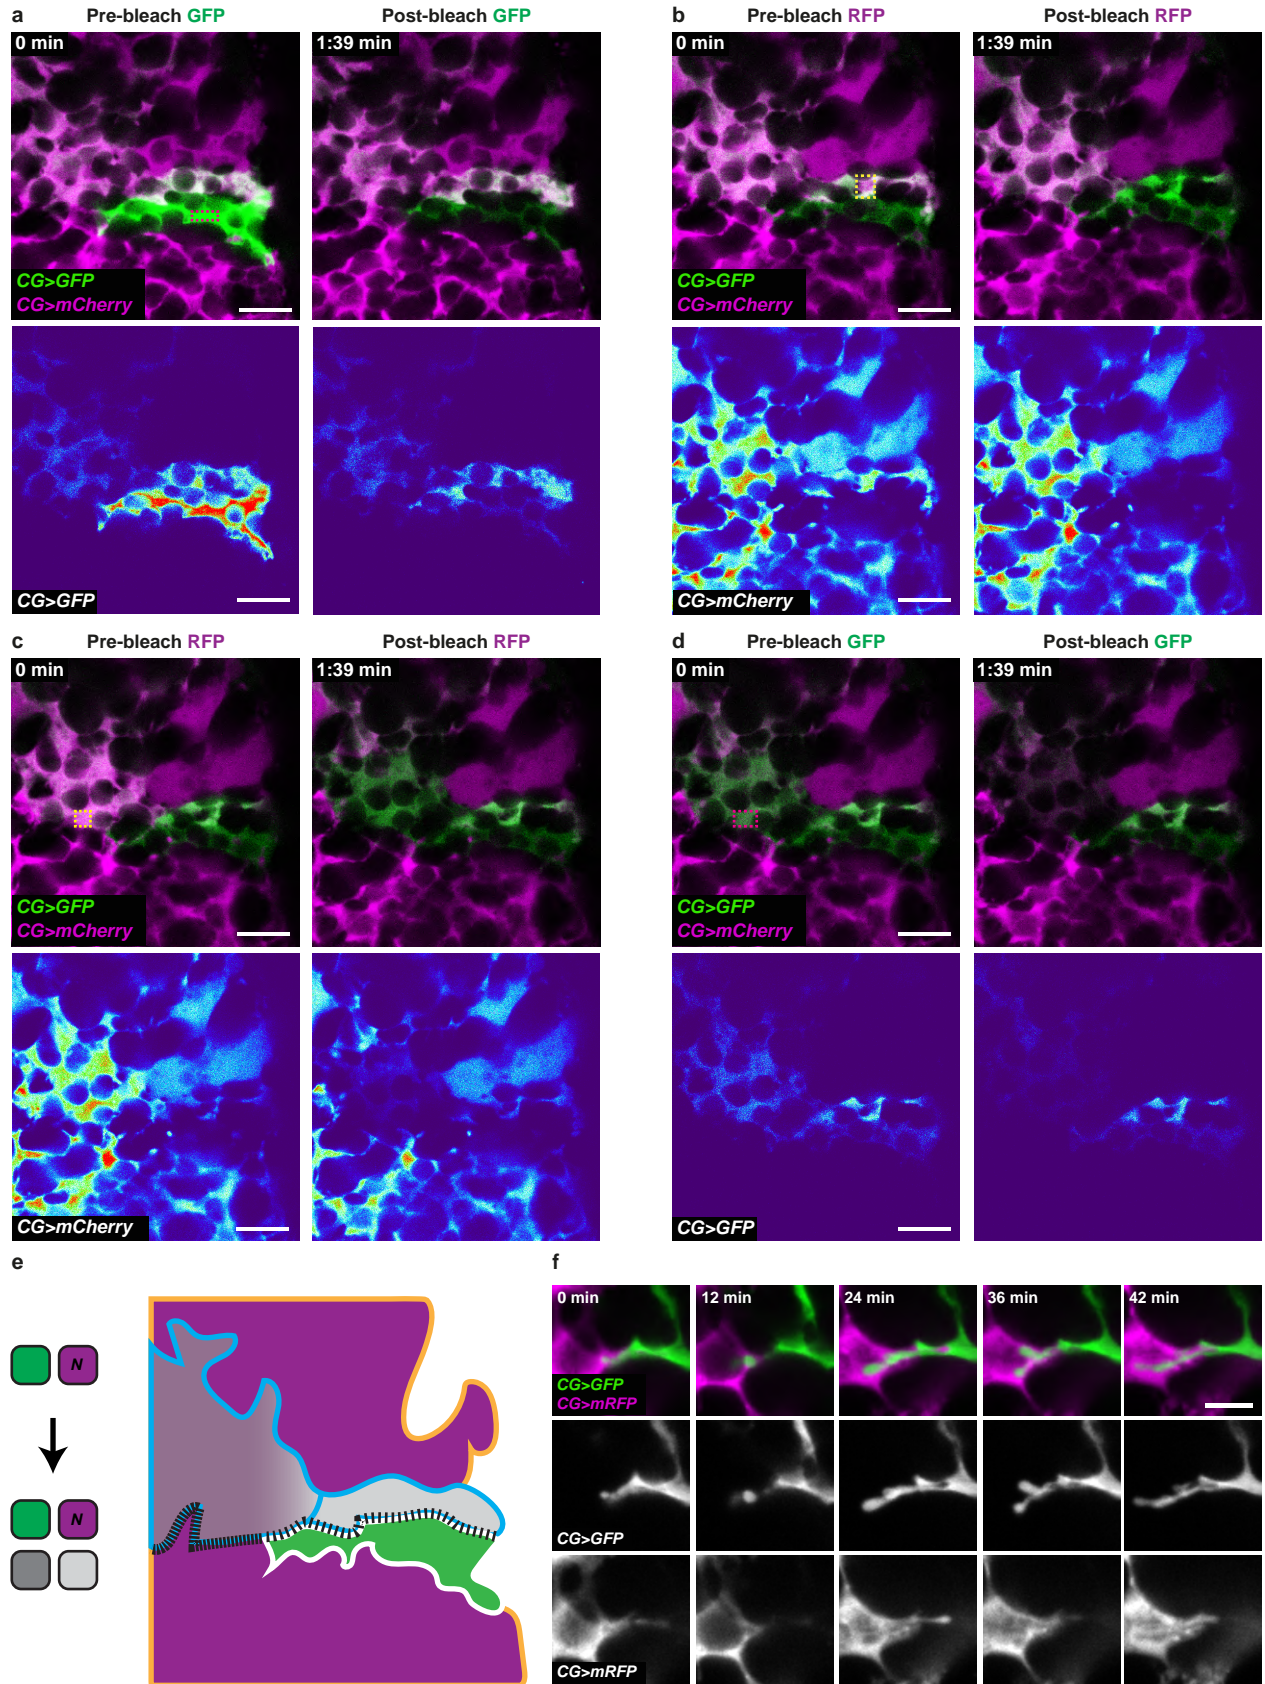

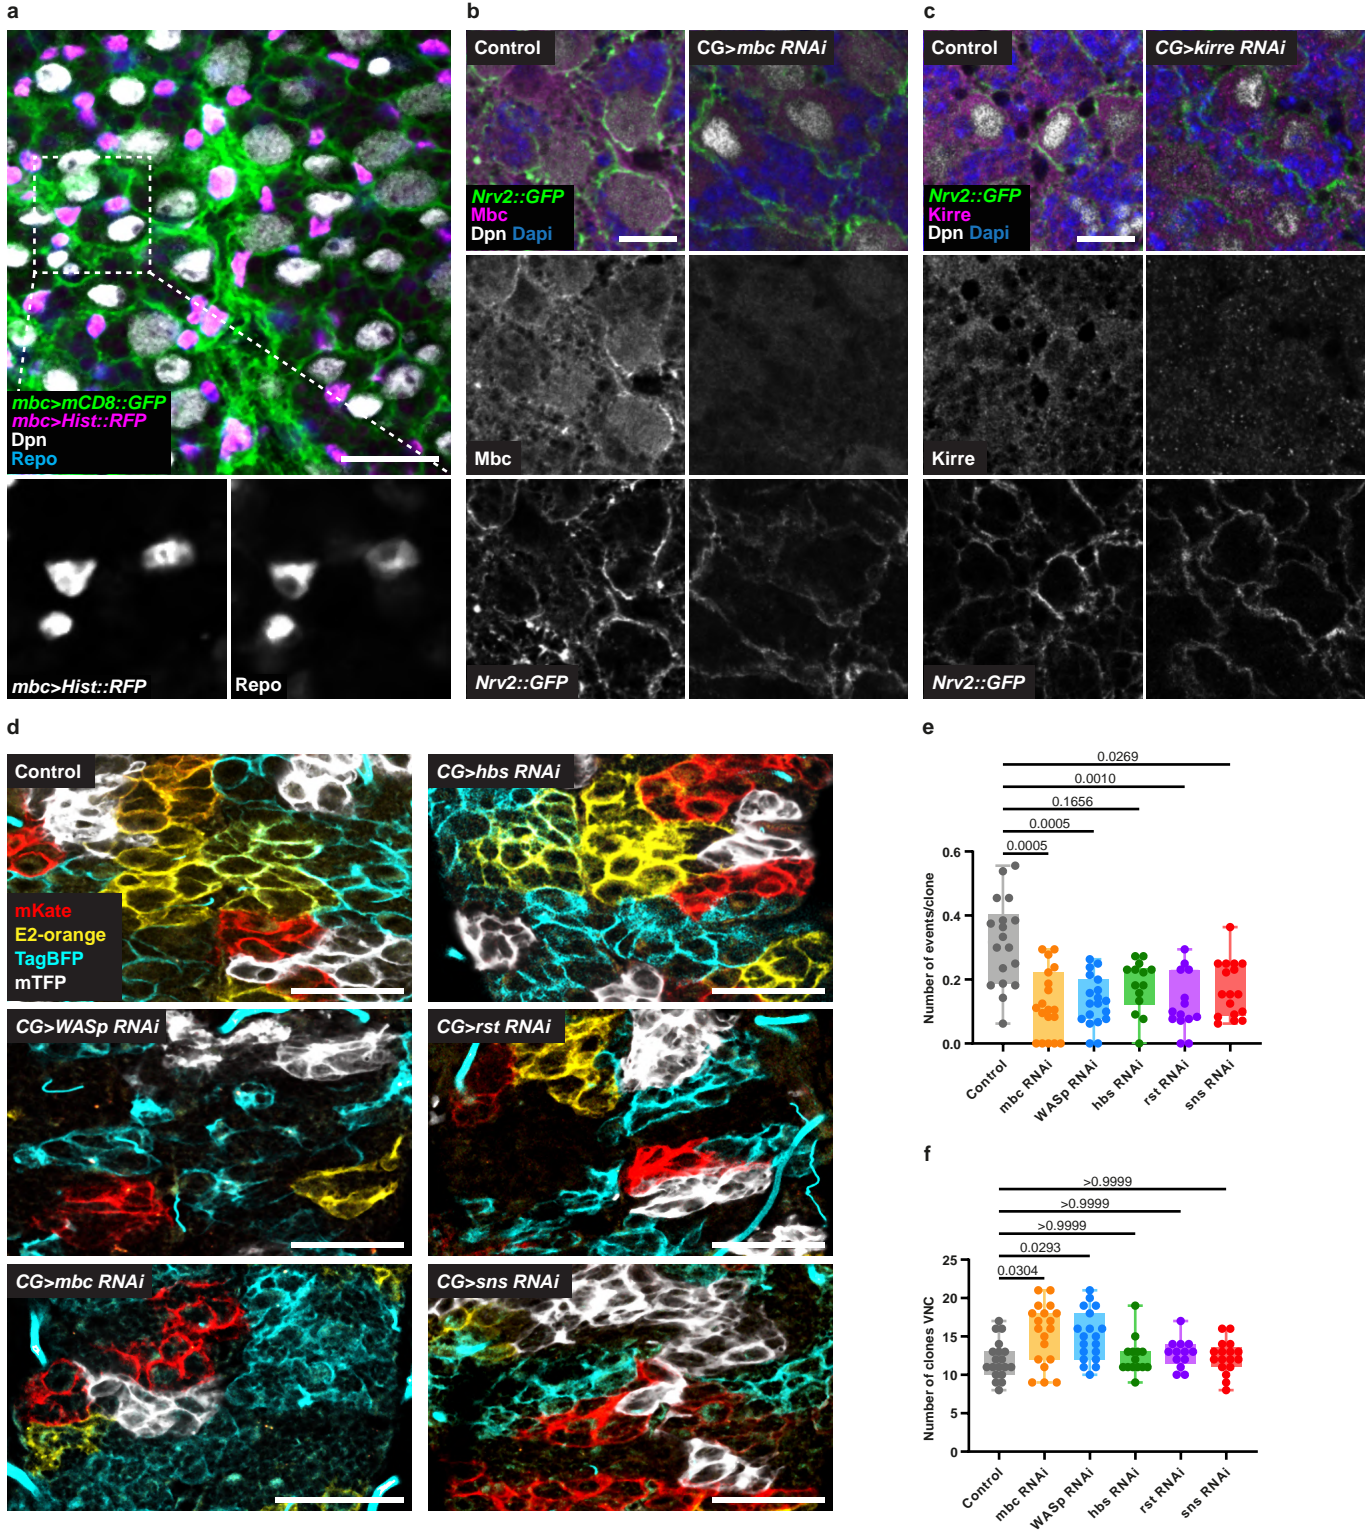



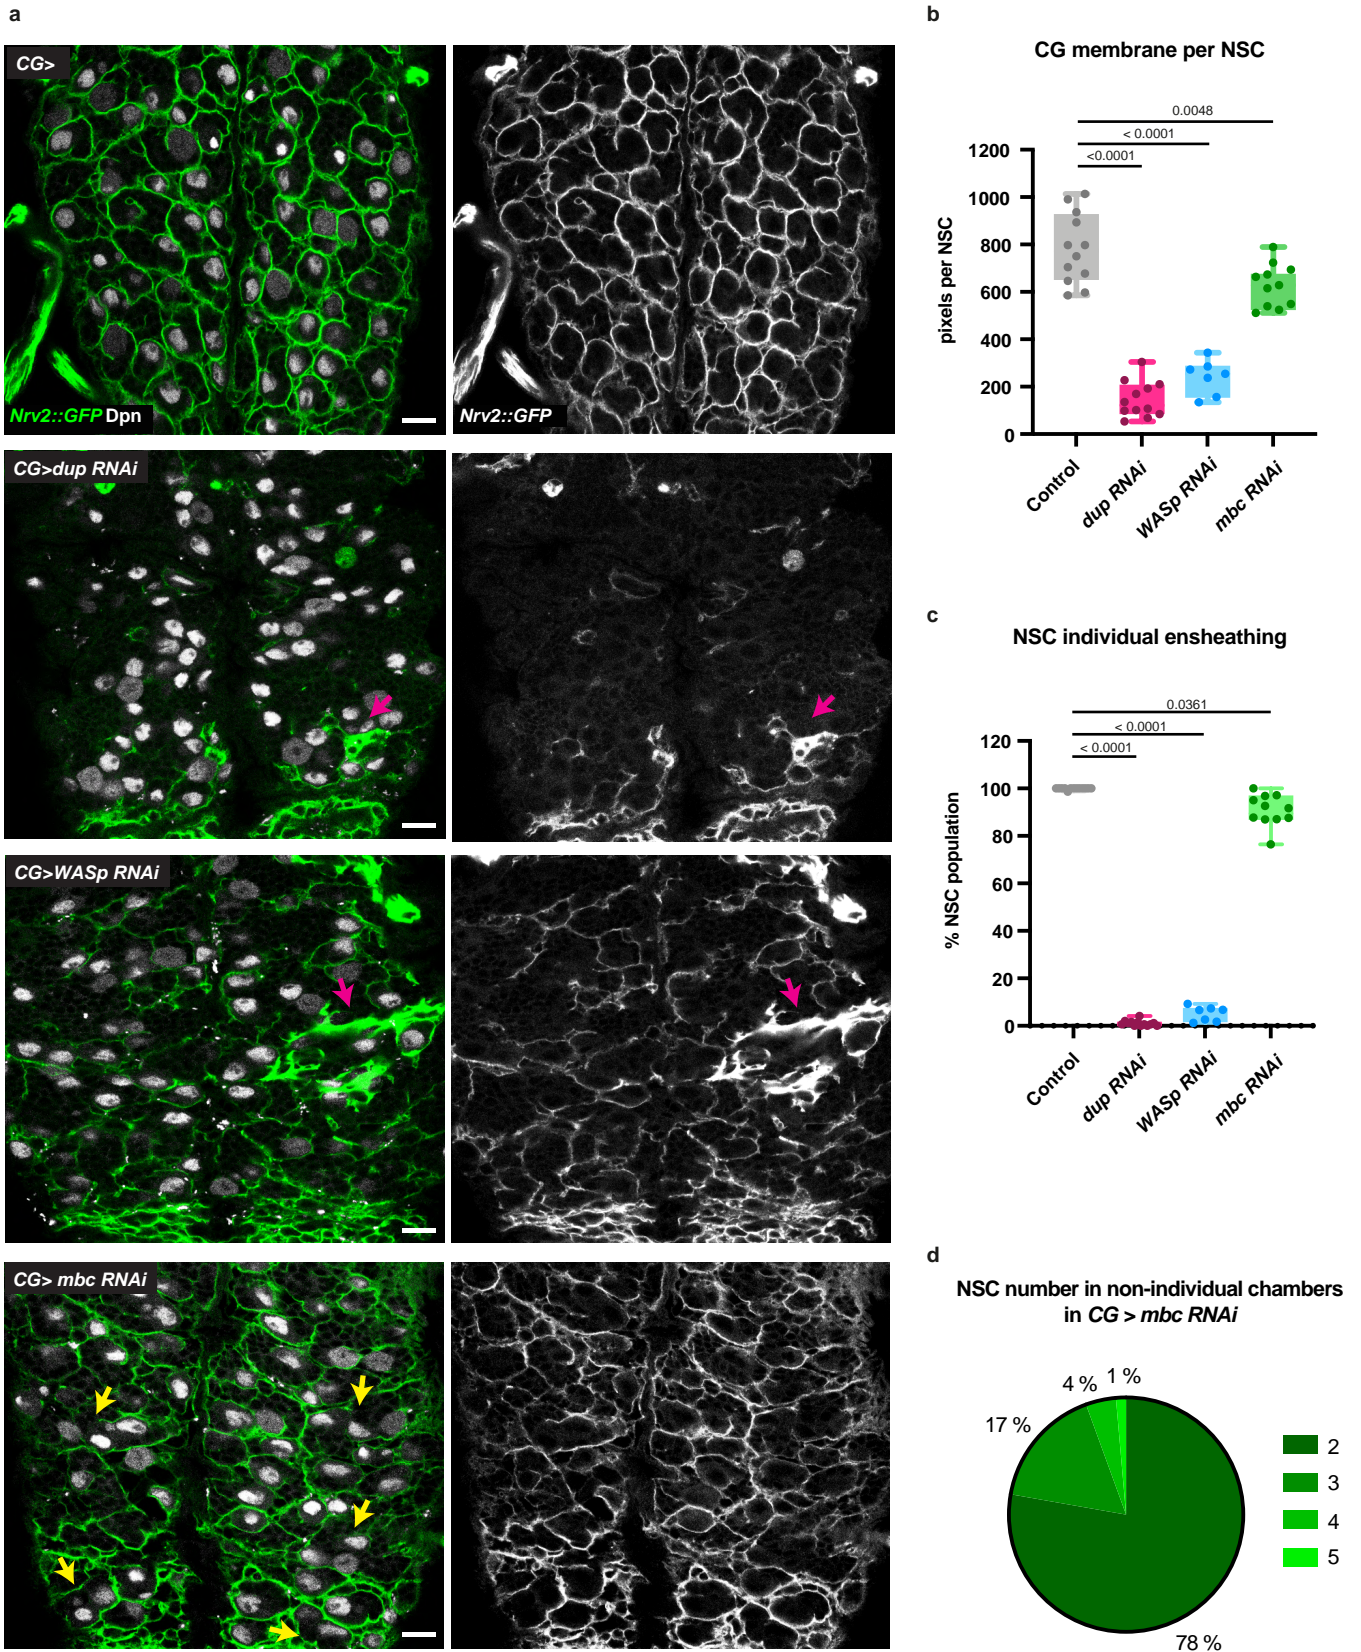

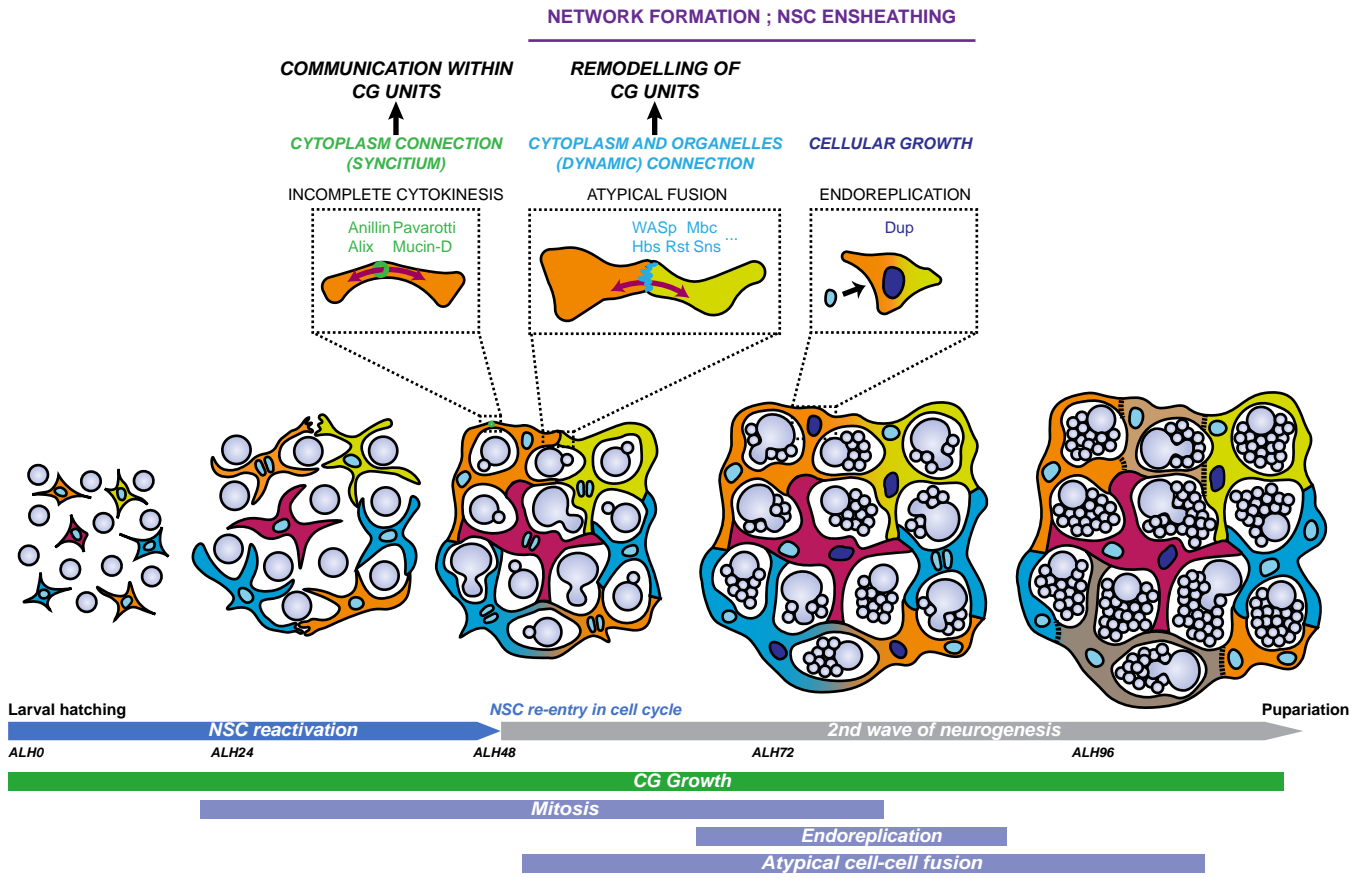

Source: https://www.biorxiv.org//content/10.1101/2021.05.09.443326v3.full.pdf
