## **Morphogenesis of a complex glial niche requires an interplay between cellular growth and fusion.**

Maria Alexandra Rujano<sup>1</sup>, David Briand<sup>1</sup>, Bojana Đelić<sup>1,2</sup> and Pauline Spéder<sup>1,\*</sup>

1. Institut Pasteur, Brain plasticity in response to the environment, CNRS, UMR3738, Paris, France.
2. Present address: Institut de Biologie de l'École Normale Supérieure (IBENS), Cell Division and Neurogenesis, École Normale Supérieure, CNRS, Inserm, PSL Université Paris, Paris, France

### **\*Corresponding author:**

Pauline Spéder, PhD

Department of Developmental and Stem Cell Biology

*Brain plasticity in response to the environment* Group

Institut Pasteur/CNRS UMR3738

25 rue du Docteur Roux

75015 PARIS

E-mail : [pauline.speder@pasteur.fr](mailto:pauline.speder@pasteur.fr)

Phone: + 33 1 45 68 89 78.

1 **Abstract**

2 Neural stem cells (NSCs) are found in a tailored, intricate cellular microenvironment, the  
3 niche, which supports and regulates their activity. Whilst niche architecture is indissociable  
4 from its function, the morphogenetic aspects of niche development have been poorly  
5 explored. Here, we use the formation of the cortex glia (CG) network in *Drosophila* as a  
6 paradigm of acquisition of architectural complexity of a NSC niche. CG are essential for  
7 normal neurogenesis and build a reticular network spanning the entire central nervous  
8 system while encasing each NSC lineage. We first show that individual CG cells grow  
9 tremendously to enwrap several NSC lineages, ultimately covering and tiling the entire tissue.  
10 Several proliferative mechanisms, including endoreplication and mitosis, in part acytokinetic,  
11 support such growth and result in the formation of multinucleated, syncytial CG cells, that  
12 we call units. We then reveal that CG units are able to fuse to each other, resulting in the  
13 exchange of several subcellular compartments, such as membrane, cytoplasm and  
14 organelles. This process relies on well-known molecular players of cell fusion, involving cell  
15 surface communication molecules and actin regulators, while being atypical by its extent,  
16 dynamics and partial nature. Ultimately, the coordination in time and space of growth,  
17 proliferation and fusion mechanisms is required for the remarkable, multi-level architecture  
18 of the *Drosophila* NSC niche.

19



## 1 **Introduction**

2 The central nervous system (CNS) is a complex organ that develops and functions under a  
3 range of physiological challenges and homeostatic variations. Throughout life, the  
4 generation of new cells in the CNS, a process called neurogenesis, is sustained by neural  
5 stem cells (NSC), multipotent progenitors that self-renew while generating more committed  
6 precursors that ultimately produce neurons and glia<sup>1-4</sup>. As such, the extent and quality of  
7 neurogenesis depends on NSC fitness and proliferative capacity, which must be tightly  
8 regulated and balanced. NSC behaviour is regulated by a combination of intrinsic  
9 (epigenetics and molecular repertoire) as well as extrinsic biochemical (e.g. growth factors  
10 and cytokines) and mechanical (cell contacts and tissue topology) factors provided by the  
11 complex cellular microenvironment where NSC reside, the niche<sup>5-7</sup>. In mammals,  
12 neurogenic niches comprise multiple cell populations including the NSC themselves, glial  
13 astrocytes, neurons, endothelial cells, resident immune cells, blood vessels forming the  
14 blood-brain barrier and extracellular matrix<sup>8-10</sup>. They form a functional and physical unit with  
15 specific cellular and molecular properties that regulate and support NSC features through  
16 integration of cell-cell, paracrine and systemic signals<sup>7,11</sup>. The NSC niche exhibits intricate,  
17 tight cellular arrangements, such as astrocytic extensions packed in between and contacting  
18 NSCs and blood vessels<sup>8,10</sup>. Direct couplings also exist between several cell types, including  
19 between and within progenitor and glia populations, creating complex cellular networks  
20 sharing signals<sup>12,13</sup>. The niche starts to form very early during embryogenesis and becomes  
21 progressively more elaborate with the progression of neurogenesis and the acquisition of  
22 tissue complexity<sup>10,14</sup>. Niche composition and structure must therefore be very dynamic in  
23 order to accommodate substantial tissue remodelling that results from neurogenesis during  
24 embryogenesis and into adulthood.

25 Remarkably, we still have scarce understanding on how the structure of the niche is  
26 established and how it acquires its 3D organization. Answering these questions requires  
27 being able to identify, track and manipulate independently niche cell populations *in vivo*,  
28 within their physiological context, conditions that the complexity of the mammalian brain  
29 makes challenging to achieve. First, the mammalian NSC niche has a highly heterogeneous  
30 cellular composition and architecture. In addition, mammalian models have complex  
31 genetics and the existence of multiple, parallel and tractable systems are rare. Finally, while  
32 *in vivo* models are a necessity in order to acquire an accurate spatial and temporal picture  
33 of the cellular dynamics taking place within a 3D niche, access to a whole living brain in  
34 mammals is still a huge challenge. To overcome these issues while offering a system

35 allowing the investigation of core, conserved cellular and molecular mechanisms supporting  
36 NSC niche formation, we use the developing larval *Drosophila* brain as a model system.  
37 *Drosophila* NSCs (historically called neuroblasts) are specified during embryogenesis,  
38 subsequently delaminate from the neuroectoderm and start proliferating to generate the  
39 neurons and glial cells that will form the larval CNS (reviewed in <sup>15–17</sup>). When these primary  
40 lineages are completed, the embryonic NSCs exit the cell cycle and enter a quiescent state.  
41 Subsequently, during larval development, NSCs are woken up from this dormant phase<sup>18</sup>  
42 by a feeding-induced nutritional signal, leading them to enlarge, re-enter the cell cycle and  
43 resume proliferation<sup>19–22</sup>. This second wave of neurogenesis lasts until the end of larval life,  
44 generating secondary lineages which will make up the majority of the adult CNS.  
45 Proliferating larval NSCs are found in a neurogenic niche which comprises common players,  
46 with related functions, to the mammalian niche –namely glial cells, a blood-brain barrier,  
47 neurons and the NSCs themselves (Figure 1a). The blood-brain barrier is essential to  
48 neurogenesis by relaying the systemic nutritional cues that will trigger NSC reactivation<sup>21,23</sup>.  
49 Beneath the blood-brain barrier lie the cortex glia (CG). CG display a striking structure  
50 around actively cycling NSCs, individually encasing them and their newborn progeny within  
51 membranous chambers while forming a network spanning the whole CNS (Fig. 1a-c)<sup>24–26</sup>.  
52 CG perform genuine niche functions. They protect NSCs against oxidative stress<sup>27</sup>, can  
53 sustain NSCs proliferation under nutritional restriction<sup>28</sup> and are essential for neuronal  
54 positioning and survival<sup>24,26,29–31</sup>. Importantly, CG network and NSC encasing (CG  
55 architecture) are not present at the beginning of larval life, when NSCs are quiescent.  
56 Previous studies have shown that this network forms progressively in response to both  
57 nutritional cues and signals from NSCs, pinpointing an exquisite coordination between  
58 neurogenic needs, systemic cues and niche morphogenesis<sup>26,32</sup>.  
59 Here, we used CG network morphogenesis as a paradigm for niche development and  
60 acquisition of architectural complexity. We first addressed the contribution of individual CG  
61 cells to network formation and showed that they grow enormously during niche  
62 morphogenesis, to eventually tile the entire CNS and encase several NSCs. We then  
63 deciphered the exact cellular events supporting CG growth, and found that CG cells  
64 proliferate by mitotic division, in part acytokinetic, and also undergo endoreplication, leading  
65 to the formation of polyploid, multinucleated cells. In addition, these syncytial cells, that we  
66 called CG units, have the ability to fuse to each other, leading to exchange of subcellular  
67 compartments, including cytoplasm, membrane, organelles and nuclear content. CG cellular  
68 fusion is supported by well-characterised cell-cell recognition molecules as well as actin

69 regulators. On the other hand, CG fusion appears atypical, as it is partial in nature and  
70 seems to be restricted and dynamic in time and space. Finally, we show that CG growth  
71 strategies and fusion between CG units are required for correct network architecture. The  
72 CG structure, made of connected cells capable of sharing information, and laying in between  
73 stem cells and vasculature, is reminiscent of the astrocytic networks present throughout the  
74 brain<sup>33</sup>. Our findings provide a novel framework to understand how syncytial, complex  
75 reticular structures are formed, as well as a tractable model to decipher the impact of niche  
76 structure on NSC functions.

77

## 1 **Results**

### 2 **Growth of individual CG cells results in a tiled organization of the cortex glia network**

3 We first sought to visualise the spatiotemporal dynamics of CG network morphogenesis  
4 during neurogenesis in the larval CNS. For this, we used either the protein trap Nrv2::GFP  
5 that labels CG membranes, or expression of membrane targeted GFP (mCD8::GFP) driven  
6 by *cyp4g15-GAL4* (expressed mostly in CG as well as in some astrocyte-like glia, readily  
7 identifiable based on morphology and dorsal compartmentalisation, see Supp. Fig S1a). In  
8 accordance with CG chambers being progressively formed in parallel with NSC  
9 reactivation<sup>26</sup>, the CG network starts as a loose, gaping meshwork at ALH0 (ALH: after larval  
10 hatching) that progress to a highly interconnected reticular network around ALH48, when it  
11 encloses each individual NSCs (Figure 1c-d, shown in the ventral nerve cord, VNC).  
12 Eventually, the CG network spans the entire tissue at ALH96. Network growth and  
13 acquisition of complexity is associated with dramatic changes in the size and morphology of  
14 CG cells, that extend their membranes to gradually accommodate the growing NSC lineages  
15 (Figure 1d). Remarkably, the resulting intricate network efficiently maintains the  
16 individualities of each NSC lineage.

17 Next, we determined the contribution of each individual CG cell to network formation and  
18 NSC encapsulation. We expressed in CG the multicolour lineage tracing tool Raepli<sup>34</sup>, that  
19 contains one single copy of membrane targeted Raepli (Raepli-CAAX) and can be  
20 induced at the desired time upon Flippase (FLP) recombination (Supp. Fig S1b). Its  
21 induction just After Larval Hatching (ALH0-2) resulted in the expression of exclusively one  
22 of four different colours in the young CG cells. Generated clones extended from ALH0 to  
23 ALH96, spanning the whole tissue and forming clear boundaries between them, ultimately  
24 tiling the entire brain (Figure 1e). A similar tiled organisation was observed previously, using  
25 stochastic expression of two fluorophores, around primary mature neurons<sup>29</sup>. We quantified  
26 the volume of individual clones over time (Figure 1f) and found a steady growth of single  
27 colour clones from ALH0 to ALH96, with the most significant increase between ALH72 and  
28 ALH96 in concomitance with NSC lineage expansion. Remarkably, we also observed that  
29 each single CG clone (derived from one single CG cell) can encase several NSC lineages  
30 (Figure 1g), ranging from 5 NSCs per clone at ALH48 to an average of 10 NSCs per clone  
31 at ALH72 (Figure 1h). All together these results show that CG are able to grow until entirely  
32 tiling the brain while precisely encapsulating several NSC lineages.

33

## 34 **CG cells exhibit multiple cell cycle strategies**

35 We then asked about the cellular mechanisms at play to support such extensive clonal  
36 growth. Two powerful, rather opposite strategies can fuel the generation of large clones.  
37 Mitosis results in both cellular and nuclear divisions and thus leads to increased cell  
38 numbers. On the other hand, endoreplication results in increased DNA content (i.e.,  
39 polyploidization) without cellular division, and results in larger cell size<sup>35–37</sup>.

40 CG proliferation has been reported previously based on CG nuclei counts, either in clones  
41 or in specific CNS region<sup>25,29,38</sup>. However, the cell cycle mechanisms supporting such  
42 proliferation, as well as the resulting cellular organization remained debated. While  
43 increased nuclei numbers suggested mitotic events, there were also evidence fitting  
44 endoreplicative processes, such as polyploidy detected at early stages<sup>32</sup>. We thus decided  
45 to do a thorough examination of the cell cycle in CG.

46 We first confirmed that CG nuclei numbers in the entire CNS largely increase between  
47 ALH48 and ALH96, after NSC encasing, suggesting that proliferation is enhanced when  
48 NSC lineages are expanding (Supp. Fig. S1c-d). To determine the contribution of the  
49 individual CG cells present at ALH0 to this increase, we induced Raeppli-CAAX clones at  
50 ALH0 and stained for the pan-glial marker Repo (Supp. Fig. S1e). Counting the number of  
51 Repo<sup>+</sup> nuclei in each CG clone revealed a fivefold increase between ALH48 and ALH96  
52 (Supp. Fig. S1f), in accordance with whole CNS count.

53 We then used the genetic tool Fly-FUCCI that allows to discriminate between G1, S and  
54 G2/M phases<sup>39</sup> to assess CG cell cycling activity along network formation, focusing on the  
55 VNC for simplicity (Fig. 2a-b). FUCCI relies on a combination of fluorescently-tagged  
56 degrons from Cyclin B and E2F1 proteins which are degraded by APC/C and CRL4<sup>CDT2</sup> from  
57 mid-mitosis and onset of S phase, respectively (Supp. Fig S2a). While CG nuclei appeared  
58 mostly in G1 at ALH0, we observed a progressive increase in the number of nuclei in S and  
59 G2/M between ALH24 and ALH72, followed by a sharp return to G1 at ALH96 (Fig. 2a-b), a  
60 temporal pattern reminiscent of the timing and level of NSC proliferation overtime. We also  
61 noticed that such change in cell cycle profile followed an antero-posterior pattern (compare  
62 ALH24 with ALH48 in Fig. 2a). This suggests that at least part of the CG population cycles  
63 between replicative and gap or mitotic phases, and that such cycling is spatially regulated  
64 and temporally coordinated with NSC behaviour.

65 To assess whether CG cells undergo proper mitosis, we checked *bona fide* mitotic  
66 hallmarks. We first stained CG cells with the mitotic marker phospho-histone H3 (PH3), at  
67 different time points (Fig. 2c-d) and detected PH3<sup>+</sup> CG cells between ALH24 and ALH72,  
68 paralleling the window of FUCCI with more CG cells in S or G2/M phases. Next, by

69 performing live-imaging of RFP-tagged histone (*Hist::RFP*) driven by *cyp4g15-GAL4* on  
70 whole brain explants (see Methods), we were able to observe DNA condensation,  
71 metaphase alignment and chromosomes' segregation (Fig. 2e, Movie S1). Moreover, we  
72 observed nuclear envelope breakdown followed by reformation using *Lamin::GFP* driven by  
73 *cyp4g15-GAL4* (Supp. Fig. S2b, Movie S2). We also looked at the behaviour of the  
74 *Drosophila* homolog of anillin (*scraps*, *scra*), a conserved scaffolding protein involved in late  
75 stages of cytokinesis<sup>40</sup>. Anillin is found in the nucleus during interphase, relocates to the  
76 contractile ring during cytokinesis<sup>41</sup>, and forms part of the midbody, a contractile ring-  
77 derived microtubule-rich proteinaceous structure assembled at the intercellular bridge  
78 between the two daughter cells at the end of mitosis and that marks the abscission site.  
79 Expressing RFP-tagged anillin in CG (*mRFP::scra*) uncovered midbody-like structures in  
80 between recently divided CG (Fig. 2f, identified by a decrease in nuclear-localised anillin  
81 compared to neighbouring CG nuclei) and midbody remnants along the CG membranes  
82 (Supp. Fig S2c). Quantifying anillin-positive midbody structures along time (Fig. 2g)  
83 revealed an increase between ALH48 and ALH96, similarly to CG nuclei counts. All together,  
84 these data suggest that CG cells do undergo proper mitosis, including nuclear division and  
85 cytokinesis.

86 Next, we sought to address whether endoreplication and subsequent polyploidization could  
87 also happen in CG. We assessed CG ploidy through DNA Fluorescence *In Situ* Hybridization  
88 (FISH) on chromosomes II and III (two out of the four *Drosophila* chromosomes<sup>42</sup>), and  
89 counted chromosome numbers in labelled CG nuclei along development (Figure 2h-i). We  
90 observed that at early stages, CG have a normal ploidy of 2n, which increases at ALH72  
91 (average ~4n, with a maximum of 10 and 9 FISH signals for chromosome 2 and 3,  
92 respectively) for part of the CG population, and decreases again to 2n at ALH96. Although  
93 we cannot exclude that part of this increase corresponds to catching DNA replication before  
94 mitosis (PH3<sup>+</sup> staining also peaks at ALH48-72, Fig. 2d), odd numbers as well as n>4 imply  
95 a contribution of polyploidization. Importantly, CG-specific downregulation of Dup (*double*  
96 *parked* gene), a DNA replication protein shown to be crucial for endoreplication<sup>43,44</sup>, caused  
97 a strong reduction in CG nuclei size and number (Figure 2j) and resulted in severe defects  
98 in CG growth and network morphogenesis (Fig. 2k). Notably, endoreplication covers two cell  
99 cycle variants<sup>35,45</sup>. Endocycle alternate DNA replication (S-phase) with a gap (G) phase and  
100 do not shown any mitotic features. Endomitosis includes S phase and some aspects of  
101 mitosis up to telophase<sup>46</sup>, but do not complete cellular division. Interestingly, by live-imaging  
102 on whole brain explants we were able to observe endomitotic events, characterized by entry



103 into mitosis followed by chromosomes segregation, but absent later mitotic stages, and  
104 instead the DNA collapses back into only one nucleus (Figure 2l, Movie S3). All together,  
105 these data show that polyploidization does occur in CG in a temporary fashion, in some  
106 cases through endomitosis, and is essential for network formation.

### 107 **CG glia are syncytial units**

108 While CG displayed well-characterized marks covering different mitotic steps, we also  
109 noticed peculiar behaviours that indicated a subtler picture. First, using live-imaging to  
110 record CG division, we noticed that mitoses often appeared synchronised between several  
111 nuclei (Fig. 3a, Movie S4). Similarly, using Fly-FUCCI, groups of neighbour nuclei were  
112 found at the same cell cycle phase (Fig. 3b). Moreover, we observed that several close-by  
113 CG nuclei were undergoing cytokinesis at the same time (anillin displaced from nuclei and  
114 accumulating in intercellular bridges), even sometimes seemingly linked by anillin  
115 cytoplasmic staining (Fig. 3b). Such coordinated behaviour between a group of CG nuclei  
116 suggest that they are receiving the same cell cycle cues. We thus wondered whether  
117 multiple CG nuclei could actually be sharing cytoplasmic material.

118 To test this hypothesis, we used a Fluorescence Loss In Photobleaching (FLIP) technique,  
119 an approach used to examine the movement of molecules inside a cell and that can also  
120 serve to assess the continuity of a cellular compartment (reviewed in <sup>47,48</sup>). FLIP relies on  
121 the continuous bleaching of a small region of a fluorescently-labelled cell, while recording  
122 the entire zone whose continuity is being assessed. The continuous illumination will result  
123 not only in the bleach of the targeted region, but also will lead to the loss of fluorescence in  
124 any connected area, due to molecular diffusion. In contrast, non-connected area will not be  
125 bleached. To assess whether CG cells share cytoplasmic material, we expressed  
126 cytoplasmic GFP and RFP-tagged histone (*Hist::RFP*) in the entire CG population and  
127 imaged an area containing several CG nuclei. We then repetitively bleached GFP in a small  
128 region of the cytoplasm and recorded the loss of fluorescence with respect to CG nuclei.  
129 Strikingly, we were able to observe loss of fluorescence in large areas containing several  
130 CG nuclei (Fig. 3c and Supp. Fig. S3), implying that indeed these CG nuclei are part of a  
131 continuous, connected cytoplasmic compartment. Quantifying FLIP experiments at different  
132 times revealed that the average number of connected CG nuclei increases twofold along  
133 CG network formation (Fig. 3d; average ALH24 = 3, versus average ALH96 = 7). These  
134 experiments show that CG cells are thus multinucleated.

135 Endomitosis could produce multinucleated cells in the rarer case they go through nuclear  
136 envelope breakdown and reformation. Nevertheless, the simplest explanation to account for

137 such an extent of multinucleation would be that CG undergo mitosis but fail to complete  
138 cytokinesis. The midbody is indeed a temporary structure formed between the two daughter  
139 cells during cytokinesis and that has a role in recruiting abscission proteins. Until recently,  
140 it was thought that the midbody was fated to being cleaved and discarded after abscission,  
141 but more recent studies have shown that midbodies can be retained or even up-taken by  
142 surrounding cells and have functions beyond abscission<sup>49</sup>. Interestingly, counting anillin-  
143 enriched midbody structures localised along CG membranes revealed a steady increase in  
144 numbers over time (Fig. 2g), what entails that they are not discarded but rather remain. This  
145 suggests that CG cells that enter mitosis but fail cytokinesis might stay connected by the  
146 intercellular bridge and the midbody. To demonstrate this possibility, we performed FLIP,  
147 expressing a cytoplasmic GFP together with mRFP::scra in all CG cells (Fig. 3e). We  
148 repetitively bleached GFP in a small cytoplasmic region next to an isolated RFP<sup>+</sup> punctum  
149 localised in a narrow cytoplasmic extension between CG nuclei. We found that the loss of  
150 fluorescence was able to propagate through the RFP<sup>+</sup> punctum, reaching CG nuclei  
151 localised on the other side. All together, these data show that CG cells are multinucleated  
152 and form syncytial compartments, in part through incomplete cytokinesis that will leave  
153 connections via the midbody/intercellular bridge. From now on, we will call these syncytial  
154 structures, CG units.

### 155 **CG units can undergo cellular fusion**

156 Using multicolour clonal analysis with membrane targeted Raeppli, we showed that  
157 individual CG cells give rise to neighbouring units with well-defined boundaries that tile the  
158 CNS, while maintaining NSC lineages individualities (Fig. 1e, g). Intriguingly, we were also  
159 able to observe membrane areas with colours overlap (Fig. 4a), that slightly increased over  
160 time (Supp. Fig. S4a-b). The partial, not complete nature of the overlap, as well as colour  
161 induction well before detected polyploidization (see Fig. 2i), excluded that such event would  
162 come from polyploid cells harbouring multiple copies of the genetic tool. We thus wondered  
163 whether sharing of colours between two neighbouring units could be a result of cell-cell  
164 fusion.

165 Cellular fusion is the process by which two cells will merge their membranes into a single  
166 bilayer, resulting in the exchange of their cytoplasmic content and subcellular compartments  
167 (organelles, nuclei). Cell-cell fusion is a fundamental process during development  
168 (fertilization), formation of tissues (such as the muscle or the placenta) and for immune  
169 response<sup>50</sup>. In addition, an increasing number of evidence links the unwanted occurrence of  
170 cell fusion to pathological mechanisms, such as cancer progression and pathogenic



171 infection<sup>51,52</sup>. Cell fusion is a stepwise process (reviewed in<sup>53–56</sup>). First cells become  
172 competent for fusion, usually with one donor and one acceptor. They then adhere to each  
173 other through cell recognition molecules. Membrane hemifusion proceeds, mediated by  
174 fusogens and actin remodelling that ultimately leads to pore formation. Cells start to  
175 exchange their cytoplasmic content through the pore, which becomes wider, and eventually  
176 fully integrate, sharing all their compartments.

177 We first wondered whether such partial colour overlap between clones could be detected  
178 for cellular compartments other than the plasma membrane. We took advantage of the  
179 CoinFLP technique, which allows the stochastic labelling in two colours of individual cells  
180 within the same population (Supp. Figure S4c)<sup>57</sup>. A bias in the system results in the  
181 generation of a minority of well-sparse clones in one of the two colours, making them easy  
182 to localise and quantify. Early induction of this tool in CG cells using *cyp4g15-FLP* (which is  
183 active before ALH0, see Methods) and two differently-labelled fluorescent cytoplasmic  
184 markers (GFP and mCherry), generated three situations (Fig. 4b-c): i) a majority of clones  
185 of only one colour (GFP only, green); ii) clones fully colocalising with the other colour (GFP  
186 + mCherry complete overlap, grey); and iii) a minority of clones partially colocalising with the  
187 other colour (GFP + mCherry partial overlap, grey-hashed green). While full overlaps might  
188 come from polyploidy, the occurrence of partial cytoplasmic overlaps fitted the hypothesis  
189 of fusion between CG units. We then performed a similar experiment using this time  
190 fluorescently-labelled mitochondrial markers, and also found partial colocalisation in a small  
191 number of cases (Supp. Fig. S4d), suggesting that two CG units from different origins can  
192 share these organelles. Finally, we used a nuclear-tagged version of Raeppli (Raeppli-NLS)  
193 to identify the nuclei belonging to different CG units. While we observed clones of  
194 neighbouring nuclei with an organisation reminiscent of what was seen with Raeppli-CAAX,  
195 and confirming clonal expansion of individual CG cells (Supp. Fig. S4e), we also found  
196 intriguing overlaps at the border of clones, with few nuclei exhibiting two colours showing  
197 qualitative inverse intensities (Suppl. Fig. S4f). This suggests that nuclei from different CG  
198 units in close vicinity can exchange nuclear targeted proteins. All together, these data show  
199 that CG units can share subcellular compartments, including plasma membrane, cytoplasm,  
200 mitochondria and nuclei.

201 Cell fusion entices that information/signals could propagate from one cell to the other up to  
202 the end of the fused area. To test this hypothesis, we combined the identification of zones  
203 of partial cytoplasmic overlap through CoinFLP (see Fig. 4b; GFP and mCherry) with a FLIP  
204 approach in live-imaging. Continuous bleaching of one colour (GFP) in a small region of one

205 of the two CG units, outside of the overlapping zone (Fig. 4d) led to a loss of fluorescence  
206 not only in the CG unit targeted by the bleaching, but also in the overlapping area (GFP +  
207 mCherry), up to the border with the other unit (mCherry alone). This shows that the  
208 overlapping zone between the two CG units is indeed in cytoplasmic continuity with at least  
209 one individual unit. This demonstrates that overlapping subcellular compartments between  
210 CG units correspond to zones of signal exchange.

211 Another prediction arising from the occurrence of cellular fusion between CG units, already  
212 multinucleated, would be that they actually create even bigger cellular compartments, with  
213 a continuity of information and containing nuclei from different origins. To test this  
214 hypothesis, we performed FLIP on CG expressing a cytoplasmic fluorescent marker (GFP)  
215 in the whole population together with stochastic multicolour nuclear labelling (Raeppli-NLS)  
216 induced early, hence leading to differently labelled clonal CG units (such as seen in Supp.  
217 Fig 4e). Continuous bleaching in a small area of the cytoplasmic GFP surrounding one of  
218 the CG clones resulted in a loss of fluorescence not only in the targeted CG clone, but also  
219 in its adjacent neighbour (Fig. 4e). We observed this event in a number of CG units with  
220 diverse organisation (see Supp. Fig. 4g for another example), making the observation  
221 reproducible qualitatively while difficult to assess quantitatively. From these data, we can  
222 conclude that CG units can fuse and generate larger connected areas, leading to exchange  
223 of subcellular compartments and associated signals at a much larger spatial scale.

## 224 **Cell fusion between CG units is regulated by canonical fusion molecules**

225 Cell-cell fusion relies on cellular and molecular mechanisms allowing one partner to invade  
226 the other. A biological model which has been highly instrumental in deciphering fusion  
227 hallmarks is the generation of myofibers in *Drosophila* (reviewed in<sup>58-60</sup>). In this model  
228 (Supp. Fig. S5a), a fusion-competent myoblast (FCM) and a founder cell (FC) recognize and  
229 bind to each other, creating a so-called fusogenic synapse. Key, well-characterized players  
230 for this step are the cell recognition and adhesion molecules that mediate the binding  
231 between the two membranes. These molecules often contain an immunoglobulin domain  
232 and are differentially localised in the fusing cells, expressed either by the FCM (Sns and  
233 Hbs) or by the FC (Kirre/Duf and Rst). Binding between partners initiate further intracellular  
234 signalling, through adapter proteins (*i.e.*, Rols7/Ants in FC and Dock in FCM), that will lead  
235 to remodelling of the actin cytoskeleton in both cells, however in different fashions. In the  
236 FCM especially, the combined actions of multiple actin regulators (WASp, Rac, Scar, Arp2/3  
237 to name a few) generate invasive podosome-like protrusions at the interface with the FC.  
238 These structures trigger a Myosin II- and spectrin-mediated response in the FCs, which is

239 followed by hemifusion of membranes and pore formation, which is then stabilized and  
240 expanded to culminate the process. The end point is the creation of a multinucleated cell,  
241 the muscle fiber. We wondered whether similar cellular events and molecular players were  
242 involved in fusion between CG units.

243 First, using live-imaging, we assessed whether we could observe dynamic cellular behaviour  
244 at the border between adjacent CG units. Using two differently-labelled fluorescent  
245 cytoplasmic markers in a CoinFLP set up in the CG, we indeed observed active protrusion-  
246 like structures tunnelling into the reciprocal cells (Fig. 4f). This suggests that some cellular  
247 remodelling takes place at the interface between two fusing CG units.

248 Next, we asked whether known molecular players of myoblast fusion were expressed and  
249 required for fusion between CG units. Notably, most players are differently expressed  
250 between the two fusing cells. In light of the restricted and for now spatially unpredictable  
251 occurrence of fusion events in the CG, we decided to first focus on molecular players known  
252 to be expressed in the two partners. We turned to Myoblast City (*mbc*), a Guanine nucleotide  
253 Exchange Factor (GEF) implicated in actin remodelling and known to be expressed, if not  
254 required<sup>61</sup>, in both the FC and the FCM (Supp Fig. S5a). We first took advantage of a  
255 genomic trap line inserting a GAL4 driver under the control of *mbc* enhancers, creating a  
256 Trojan *mbc-GAL4*<sup>62,63</sup>. Driving both a nuclear (Hist::RFP) and membrane reporter  
257 (mCD8::GFP) revealed a strong expression in the CG (co-stained with the glial marker  
258 Repo), reproducing the characteristic CG meshwork pattern (Fig. 5a). Moreover, expressing  
259 lineage tracing tools (i-TRACE<sup>64</sup> and G-TRACE<sup>65</sup>) under *mbc-GAL4* indicated that *mbc* is  
260 expressed in the CG throughout development (Supp. Fig. S5b-d). *mbc* expression in the CG  
261 was further confirmed by immunostaining with an anti-Mbc antibody, whose staining was  
262 enriched along the CG membranes (Fig. 5b). Importantly, such enrichment was lost upon  
263 *mbc* RNAi-mediated downregulation in the CG (Fig. 5b). Of note, both *mbc-GAL4* and Mbc  
264 antibody showed that *mbc* was expressed in other cell types, notably the surface glia and  
265 astrocyte-like glia, as well as in a few neurons (data not shown). Importantly, we were able  
266 to detect a faint staining for the adhesion molecule Kirre, which colocalised with a marker  
267 for the CG membrane and which was lost under *kirre* knockdown in the CG (Fig. 5c). All  
268 together, we show that Mbc and Kirre, two known regulators of myoblast fusion, are  
269 expressed in the CG during larval stages.

270 We then asked whether *mbc*, as well as other molecular players associated with myoblast  
271 fusion, were required for fusion between CG units. We independently knocked down several  
272 fusion genes in the CG through RNAi while inducing multicolour clonal labelling (Raepli-

273 CAAX) and calculated the number of fusion events (overlap between at least two colours,  
274 see Methods) per VNC compared to a control condition (Fig. 5d). Strikingly, we observed a  
275 significant reduction in the number of fusion events when either *mbc*, *Wasp*, *hbs* or *rst* were  
276 knocked down (Fig. 5e). For *mbc* and *Wasp*, which showed the most significant reductions,  
277 this was paired with a slight increase in number of clones per VNC (Fig. 5f), in accordance  
278 with preventing the generation of larger CG units. *sns*, *kirre* and *lmd* knockdowns also  
279 tended towards a reduction in the number of fusion events, albeit the difference was not  
280 statistically significant (Fig. 5d-e and Supp. Fig. S6a-c). These data show that known  
281 molecular players of classical fusion pathways regulate fusion of CG units.

### 282 **Cellular fusion of CG units is required for correct CG architecture**

283 Our results have shown that fusion does occur between CG units, at a relatively low rate.  
284 We enquired about the functional relevance of such events for the structure and function of  
285 the CG. To do so, we took advantage of our data identifying molecular regulators of fusion  
286 between CG units (Fig. 5) and assessed the impact of knocking them down in the CG.  
287 We observed that individually knocking down fusion genes resulted in alterations of the  
288 overall CG network structure, although ranging in magnitude (Fig. 6a and Supp. Fig. S6d).  
289 We first observed localised disruptions or alterations in chamber shapes for *mbc*, *dock* and,  
290 in a lesser extent, for *kirre*, *sns* and *lmd* (see arrows). In particular, we noticed in *mbc* RNAi  
291 some heterogeneous distribution of the CG membrane, with local accumulation or rather  
292 fainter signal or restricted gap (Fig. 6a). Meanwhile, *WASp* RNAi led to a dramatic  
293 disorganisation of the CG network, with destruction of NSC chamber structure and loss of  
294 membrane coverage along the network, something we also observed through *Raepli*  
295 CAAX (Fig. 5c). As *WASp* is a general regulator of actin cytoskeleton, by enabling actin  
296 nucleation for microfilament branching, it is possible that its effects bypass its strict  
297 involvement in fusion mechanisms, leading to stronger phenotypes. Taken these  
298 observations together, we propose that fusion genes are important for refining/precise CG  
299 network and chamber organisation.

300

## 1 **Discussion**

2 Here we dissect the cellular mechanisms supporting the acquisition of architectural  
3 complexity in the *Drosophila* NSC niche using the morphogenesis of the CG network as a  
4 paradigm. We have first uncovered that individual CG cells grow extensively during niche  
5 formation, becoming both polyploid and multinucleated through events of endoreplication  
6 and acytokinetic mitosis. As such they form syncytial units in which the different nuclei stay  
7 connected, some of which through cytoplasmic bridges as visualized by residual midbodies.  
8 We found that these CG units enwrap several NSCs and mostly form neat membrane  
9 boundaries between each other, covering the entire CNS in a tile-like fashion. Furthermore,  
10 we revealed that CG units can also fuse with each other, relying on classical pathways  
11 involving adhesion molecules and actin regulators. This fusion results in the exchange of  
12 several subcellular compartments, including cytoplasm and organelles, between the CG  
13 units involved. Ultimately, the combination of cellular growth, proliferation and fusion are  
14 required to build CG niche architecture (Fig. 6b).

15 Polyploidy has been associated with large cells or cells that need to be metabolically active,  
16 as a way to scale their power of biosynthesis to their cellular functions (reviewed in<sup>37,46</sup>). For  
17 example, the megakaryocytes of the bone marrow, which are required to generate large  
18 quantities of mRNA and protein for producing platelets, undergo polyploidization. Polyploidy  
19 is also an elegant way to support cell growth while protecting a specific cell architecture that  
20 would suffer from mitosis-associated adhesion and cytoskeleton changes. In this line, the  
21 polyploidization of the subperineurial glia, which exhibit strong junctions to fulfil its role as a  
22 blood-brain barrier, has been shown to maintain barrier integrity in response to CNS  
23 growth<sup>43</sup>. The CG cells, which have a highly complex topology integrating NSC position and  
24 display large sizes (Fig. 1f) fits both categories.

25 Importantly, increase in ploidy can be achieved by different processes, many of which rely  
26 on variations of the cell cycle<sup>35,36,45,66</sup>, including endocycle (alternance of S and G phases  
27 without chromosome segregation), endomitosis (alternance of S and G phases with partial  
28 mitotic progression, generally until anaphase) and acytokinetic mitosis (mitosis without  
29 abscission). Here we propose that CG exhibit several cycling strategies to increase their  
30 ploidy. The increase in chromosome number seen in some nuclei (Fig. 2h-i) as well as some  
31 aborted DNA segregation at anaphase (Fig. 2l) imply that CG undergo either endocycling or  
32 endomitosis without nuclear division. In addition, some CG perform acytokinetic mitosis,  
33 displaying all stages of mitosis including intercellular bridges and midbody formation (Fig.  
34 2c-d, f-g and Supp. Fig. S2b), but without abscission, leading to a syncytial, multinucleated



35 unit of CG cells (Fig. 3e). We cannot exclude that some CG cells complete mitosis and  
36 undergo proper cell division, an outcome challenging to observe considering CG  
37 architecture. Interestingly, acytokinetic mitosis is reminiscent of what happens in the  
38 germline stem cell niche of many animals<sup>67</sup>, including in *Drosophila* in which the maturing  
39 oocyte and supporting nurse cells stay connected by ring canals, intercellular bridges that,  
40 instead of undergoing abscission, are stabilized on arrested cleavage furrows<sup>68</sup>. Notably,  
41 blocking endoreplication is detrimental to network formation (Fig. 2k), whereas preventing  
42 the increase in CG nuclei (through knockdown of *string/cdc25*, what prevents mitotic entry,  
43 or expression of the cyclin E/cdk2 inhibitor *dacapo*, what blocks G1 to S transition) did not  
44 have any detectable impact<sup>26</sup>, a puzzling observation. How the balance between  
45 endoreplication and mitosis is regulated, as well as more generally the trigger(s) and timing  
46 for these processes are the next key questions that need to be addressed. The antero-  
47 posterior wave of CG cycling (Fig. 2a) is particularly intriguing. Notably, it was shown before  
48 that CG proliferation depends on nutrition via activation of the PI3K/Akt pathway<sup>26,38</sup>, also a  
49 crucial regulator of NSC exit from quiescence during early larval development. The interplay  
50 between spatial and temporal signalling will thus be of special interest.

51 Using several approaches, including dual and multicolour clonal analysis for different  
52 subcellular compartments, FLIP experiments and targeted loss of function, we have shown  
53 that CG units have the ability to interact with each other and share their components in a  
54 manner dependent of known molecular players in myoblast fusion. A puzzling observation  
55 is the spatially-limited nature of this exchange, as witnessed through cytoplasmic and  
56 membrane markers (Fig. 4a-d). Our data indeed support the existence of atypical fusion  
57 events, partial in nature, dynamic in time and plastic in space. Complete, classical cell-cell  
58 fusion is expected to lead to full mixing of all components in time. Although some  
59 compartmentalisation between components of the two cells of origin could still be  
60 happening, depending on mixing properties (i.e., membrane proteins; phase separation) or  
61 fixed positioning (i.e., nuclei), cytoplasmic contents at least should be fully combined,  
62 homogeneously or at least in a gradient manner, per diffusion laws. However, we are able  
63 to observe sharp boundaries between fused (i.e., colour overlap) and unfused (one colour)  
64 regions (Fig. 4a-b). A possibility could be that we catch the event at a very early stage.  
65 However, in this case we should expect some complete colour overlap at later stages, at  
66 least at the same frequency with which partial mixing happened at the previous recorded  
67 stages, something we do not see (see Fig. 1e, ALH96, representative of the rarity of  
68 complete overlaps at this stage). A fitting explanation could be that the fusion happening

69 between CG cells is somehow transient, and that other, unknown mechanisms exist to  
70 rupture and close membranes again, severing the communication between the two original  
71 CG units, either on one side or in both. The boundary between CG units would be flexible,  
72 behaving like a moving barrier and creating mixed CG domains as remnants. Interestingly,  
73 there has been some previous reports of partial cell fusion (discussed in<sup>69</sup>), suggesting that  
74 such phenomenon might be underestimated and possibly hidden. For example, partial  
75 cellular exchange of proteins and organelles has been documented between stem cell and  
76 differentiated cells (cardiomyocytes), a phenomenon leading to nuclear reprogramming of  
77 the differentiated cells<sup>70</sup>. One of the proposed cellular bases for such partial exchange is  
78 through the establishment of tunnelling nanotubes, which are thin and long membranous,  
79 actin-based protrusions, that connect and offer a compartmental continuity between two,  
80 often distant, cells<sup>71,72</sup>. Actually, the exact cellular mechanisms at play during fusion between  
81 CG units remain to be precisely identified. Although the involvement of at least some of the  
82 molecular players controlling myoblast fusion suggests shared adhesion and actin-  
83 dependent mechanisms, whether similar asymmetry in cell players (e.g., fusion competent  
84 cells versus founder cells), molecular interactions and intracellular signalling happen in CG  
85 is left to be demonstrated. Recently, full cytoplasmic exchange between cells of the  
86 *Drosophila* rectal papillae have been shown to happen through membrane remodelling and  
87 gap junction communication rather than classical fusion pathways<sup>73</sup>. Interestingly, we  
88 sometimes observe a lesser intensity of one of the fluorophores in the shared, fused zone,  
89 at least for membrane (see Fig. 4a), suggesting that material exchange might not be  
90 homogeneous, and rather directional and/or controlled. Ultimately, the exact nature of the  
91 fusion between CG units remains to be thoroughly investigated.

92 The parameters regulating the frequency, location and timing of these atypical fusion events  
93 also remain mysterious. A way to understand when and where fusion happens might be to  
94 understand why it happens. Here we show that fusion between CG units is required for a  
95 gapless, seemingly-continuous meshwork (Fig. 6a). Beyond a more generic role of the actin  
96 cytoskeleton in CG architecture, as hinted with WASp phenotype, this could suggest that  
97 CG fusion somehow ensures that no gap in CG network and in the associated coverage of  
98 NSCs is left unmet. A first hypothesis would be that fusion acts as a rescue mechanism,  
99 kicking in when tiling between CG units fails. Fusion events can indeed be triggered in stress  
100 situations, as a fast adaptive mechanism<sup>74</sup>. Another option would see fusion as a strategy  
101 to modulate the extent of communication and signal exchange within the CG network, as a  
102 response either to CG own fluctuating needs or to NSC behaviour, fulfilling its role as a

103 neurogenic niche. In this line, we noticed a slight fluctuation in the number of fusion events  
104 (Supp. Fig. S4b), as well as in the number of NSCs encased by one CG unit overtime  
105 (Fig. 1h, decrease between ALH72 to ALH96), hinting that remodelling of CG unit  
106 boundaries through fusion might be a way to control niche properties along neurogenesis.

107 Here we show that a glial, reticular network is built from cell growth and cell fusion  
108 mechanisms, resulting in a highly connected structure which enwraps NSC. Although the  
109 exact same topology might not be found in mammals, it is interesting to note that astrocytes  
110 have been shown to set up gap junctions between them, becoming a so-called astrocytic  
111 syncytium<sup>75,76</sup>. Moreover, astrocytes in the mammalian NSC niche form, through their end  
112 feet, a reticular structure sitting between neural progenitors and the blood vessels<sup>9</sup>, similarly  
113 to the *glia limitans* between the meninges and the cerebral parenchyma<sup>77</sup>. This suggests  
114 that connected glial networks, regardless of the exact mechanism building their properties,  
115 might be a common occurrence during CNS development. In addition, increasing evidence  
116 pinpoints the existence of fusion-based cell-cell communication in the mammalian brain<sup>78,79</sup>,  
117 as well as restricted polyploidy, such as in Purkinje neurons. Understanding the features  
118 and regulators of CG morphogenesis, as well as the resulting roles on neurogenesis, thus  
119 provides an original blueprint to explore several aspects of morphogenetic processes of  
120 complex structures, fully within as well as beyond the neurogenic context.

121



## 1 Methods

### 2 Fly lines and husbandry

3 *Drosophila melanogaster* lines were raised on standard cornmeal food at 25°C. Lines used  
4 in this study are listed in the table below:

5

| Strains                                            | Source            | Stock number/Reference |
|----------------------------------------------------|-------------------|------------------------|
| <i>w<sup>1118</sup></i>                            | BDSC              | 5905                   |
| <i>Nervana2::GFP (Nrv2::GFP)</i>                   | BDSC              | 6828                   |
| <i>tubulin-GAL80<sup>thermosensitive(ts)</sup></i> | BDSC              | 65406                  |
| <i>Cre recombinase</i>                             | BDSC              | 851                    |
| <i>yw, hs-FLP</i>                                  | A. Brand lab      |                        |
| <i>CoinFLP</i>                                     | BDSC              | 58750                  |
| <i>cyp4g15-GAL4</i>                                | BDSC              | 39103                  |
| <i>cyp4g15-FRT-STOP-FRT-LexA</i>                   | This study        |                        |
| <i>cyp4g15-FLP</i>                                 | This study        |                        |
| <i>alrm-GAL4</i>                                   | Marc Freeman lab  | <sup>80</sup>          |
| <i>mbc-GAL4 (Trojan)</i>                           | BDSC              | 66840                  |
| <i>UAS-H2B::YFP (Hist::YFP)</i>                    | F Schweisguth lab | <sup>81</sup>          |
| <i>UAS-H2B::RFP (Hist::RFP)</i>                    | Y Bellaïche lab   | <sup>82</sup>          |
| <i>UAS-His3.3.mIFP-T2A-HO1 (Hist::IFP)</i>         | BDSC              | 64184                  |
| <i>UAS-GFP</i>                                     | BDSC              | 1522                   |
| <i>UAS-mCD8::GFP</i>                               | BDSC              | 5130                   |
| <i>UAS-mCD8::RFP</i>                               | BDSC              | 27399                  |
| <i>UAS-mito::GFP</i>                               | BDSC              | 8443                   |
| <i>LexAOp-mCherry::mito</i>                        | BDSC              | 66531                  |
| <i>UAS-Raeppli CAAX 43E</i>                        | BDSC, This study  | 55082                  |
| <i>UAS-Raeppli NLS 53D</i>                         | BDSC, This study  | 55087                  |
| <i>LexAop-Raeppli CAAX 43E</i>                     | BDSC, This study  | 55082                  |
| <i>UAS-mRFP::Scra</i>                              | BDSC              | 52220                  |
| <i>Fly FUCCI</i>                                   | BDSC              | 55117                  |
| <i>G-TRACE</i>                                     | BDSC              | 28280                  |
| <i>iTRACE</i>                                      | BDSC              | 66387                  |
| <i>UAS-mbc RNAi</i>                                | BDSC              | 32355                  |
| <i>UAS-WASp RNAi</i>                               | BDSC              | 51802                  |
| <i>UAS-rst RNAi</i>                                | VDRC              | 27223                  |
| <i>UAS-hbs RNAi</i>                                | BDSC              | 57003                  |
| <i>UAS-kirre RNAi</i>                              | VDRC              | 27227                  |
| <i>UAS-lmd RNAi</i>                                | BDSC              | 42871                  |
| <i>UAS-sns RNAi</i>                                | BDSC              | 64872                  |
| <i>UAS-dock RNAi</i>                               | BDSC              | 27728                  |
| <i>UAS-dup RNAi</i>                                | BDSC              | 29562                  |

6

## 7 Larval staging

8 Embryos were collected within 2-4 hours window on grape juice-agar plates and kept at  
9 25°C for 20-24 hours. Freshly hatched larvae were collected within a 1 hour time window  
10 (defined as 0 hours after larval hatching, ALH0), transferred to fresh yeast paste on a  
11 standard cornmeal food plate and staged to late first instar (ALH24), late second instar  
12 (ALH48), mid third instar (ALH72) and late third instar (ALH96).

13

## 14 DNA cloning and *Drosophila* transgenics

15 A portion of the *cyp4g15* enhancer (GMR55B12, Flybase ID FBsf0000165617), which drives  
16 in the cortex glia and (some) astrocyte-like glia, was amplified from genomic DNA extracted  
17 from *cyp4g15-GAL4* adult flies, with a minimal *Drosophila* synthetic core promoter [DSCP<sup>83</sup>]  
18 fused in C-terminal.

19 For creating *cyp4g15-FLP*, the *FLP* DNA, which codes for the flippase enzyme, was  
20 amplified from the plasmid pMH5<sup>84</sup> (Addgene 52531). This amplicon together with the  
21 *cyp4g15<sup>DSCP</sup>* enhancer were joined using the Multisite gateway system<sup>85</sup> in the destination  
22 vector pDESThaw sv40 (gift from S. Stowers) in order to generate a *cyp4g15<sup>DSCP</sup>-FLP*  
23 construct. The construct was integrated in the fly genome at an attP18 docking site through  
24 PhiC31 integrase-mediated transgenesis (BestGene). Several independent transgenic lines  
25 were generated and tested, and one was kept (*cyp-FLP*).

26 For creating *cyp4g15-FRT-STOP-FRT-LexA*, a FRT STOP cassette was amplified from an  
27 UAS-FRT.STOP-Bxb1 plasmid (gift from MK. Mazouni) and the LexA sequence was  
28 amplified from the entry vector L2-LexA::p65-L5 (gift from M. Landgraf). The two amplicons  
29 were joined together by overlapping PCRs. This *FRT-STOP-FRT-LexA* amplicon together  
30 with the *cyp4g15<sup>DSCP</sup>* enhancer were inserted in the destination vector pDESThaw sv40  
31 using Multisite gateway system<sup>85</sup> to generate a *cyp4g15<sup>DSCP</sup>-FRT-STOP-FRT-LexA::p65*  
32 construct. The construct was integrated in the fly genome at an attP2 or attP40 docking sites  
33 through PhiC31 integrase-mediated transgenesis (BestGene). Several independent  
34 transgenic lines were generated and tested, and one was kept for each docking site.

35

## 36 Generation of UAS-Raeppli and LexAOp-Raeppli lines

37 The original construct (BDSC 55082), placing Raeppli CAAX under the control of both UAS  
38 and LexAOp sequences, was crossed to a Cre recombinase line (BDSC 851) to randomly  
39 excise one of the two control sequences. The resulting lines were checked by PCR to  
40 determine whether they carried the UAS or LexAOp version.

41 A similar protocol was followed to generate UAS-Raeppli NLS 53D and LexAOp-Raeppli

42 NLS 53D constructs from the original line BDSC 55087.

43

#### 44 **Fixed tissue Immunohistochemistry and imaging**

45 For immunohistochemistry, CNS from staged larvae were dissected in PBS, fixed for 20 min  
46 in 4% formaldehyde diluted in PBS with 0.1% Triton X-100, washed two times in PBS-T  
47 (PBS+0.3% Triton X-100) and incubated overnight at 4°C with primary antibodies diluted in  
48 PBS-T. After washing three times in PBS-T, CNS were incubated overnight at 4°C with  
49 secondary antibodies (dilution 1:200) and DAPI (1:1000) diluted in PBS-T. Brains were  
50 washed three times in PBS-T and mounted in Mowiol mounting medium on a borosilicate  
51 glass slide (number 1.5; VWR International). Primary antibodies used were: guinea pig anti-  
52 Dpn (1:5000, in-house made, using pET29a-Dpn plasmid from J. Skeath for production),  
53 rabbit anti-Dpn (1:200, gift from R. Basto), chicken anti-GFP (1:2000, Abcam ab13970), rat  
54 anti-ELAV (1:100, 7E8A10-c, DSHB), mouse anti-Repo 1:100 (DSHB, 8D12-c), rabbit anti-  
55 Phospho-histone H3 (1:100, Millipore 06-570), rat anti-mbc (1/200), guinea pig anti-kirre  
56 (1/1000). Fluorescently-conjugated secondary antibodies Alexa Fluor 405, Alexa Fluor 488,  
57 Alexa Fluor 546 and Alexa Fluor 633 (ThermoFisher Scientific) were used at a 1:200 dilution.  
58 DAPI (4',6-diamidino-2-phenylindole, ThermoFisher Scientific 62247) was used to  
59 counterstain the nuclei.

60

#### 61 **Image acquisition and processing**

62 Confocal images were acquired using a laser scanning confocal microscope (Zeiss LSM  
63 880, Zen software (2012 S4)) with a Plan-Apochromat 40x/1.3 Oil objective. All brains were  
64 imaged as z-stacks with each section corresponding to 0.3-0.5  $\mu\text{m}$ . Images were  
65 subsequently analysed and processed using Fiji (Schindelin, J. 2012), Volocity (6.3 Quorum  
66 technologies), the Open-Source software Icy v2.1.4.0 (Institut Pasteur and France  
67 Bioimaging, license GPLv3) and Photoshop (Adobe Creative Cloud).

68

#### 69 **Live imaging**

70 For live imaging, culture chambers were prepared by adding 300  $\mu\text{l}$  of 1% low-melting  
71 agarose prepared in Schneider's medium supplemented with pen-strep on a glass-bottom  
72 35 mm dish (P35G-1.5-14-C, MatTek Corporation) and allowed to solidify. Circular wells of  
73 approximately 2 mm diameter were then cut out using a 200  $\mu\text{l}$  pipette tip fitted with a rubber  
74 bulb. CNS from staged larvae were dissected in Schneider's Drosophila medium (21720-  
75 024, Gibco) supplemented with 10% heat-inactivated fetal bovine serum (10500, Gibco),  
76 penicillin (100 units  $\text{ml}^{-1}$ ) and streptomycin (100  $\mu\text{g ml}^{-1}$ ) (penicillin-streptomycin 15140,

77 Gibco). 4–6 CNS were placed inside small wells of a pre-prepared culturing chamber and  
78 covered with culture medium (Schneider's + 5 % FBS + larval lysate (10  $\mu$ l/ml) + pen/strep  
79 (1/100). Larval lysate is prepared by homogenising twenty 3rd instar larvae in 200  $\mu$ l of  
80 Schneider's, spinning down once at 6000 rpm for 5min at 4°C, and recovering the  
81 supernatant. Brains were set in position and let to settle around 5-10 minutes before starting  
82 imaging. Brains were imaged on a laser scanning confocal microscope (Zeiss LSM 880, Zen  
83 software (2012 S4)) fitted with a temperature-controlled live imaging chamber (TC incubator  
84 for Zeiss Piezo stage, Gataca systems) using a Plan-Apochromat 40x/1.3 Oil objective.  
85 Four-dimensional z-stacks of 5–10  $\mu$ m at 0.5  $\mu$ m intervals were acquired every 2-3min.  
86 Movies were performed on the ventral side of the ventral nerve cord. Images were  
87 subsequently analysed and processed using Fiji (Schindelin, J. 2012).

88

### 89 **Quantification of cortex glia nuclei and mitotic cortex glia**

90 Wild-type brains expressing RFP or GFP-tagged (*Hist::RFP* or *Hist::YFP*, respectively)  
91 driven by *cyp4g15-GAL4*, were stained with phospho-histone H3 antibody to detect mitotic  
92 CG. Entire brains were imaged and quantification of total and mitotic CG nuclei numbers  
93 were performed in Volocity using adjusted protocols for detection of objects.

94

### 95 **Cell cycle analysis (FUCCI)**

96 We used the Fly-FUCCI system<sup>39</sup> that allows to discriminate between different phases of  
97 the cell cycle by expressing truncated forms of E2F and Cyclin B (CycB) fused to EGFP and  
98 mRFP1, respectively (EGFP::E2F 1-230, mRFP1::CycB 1-266). We used the *cyp4g15-*  
99 *GAL4* driver to express UAS-EGFP::E2F 1-230 and UAS-mRFP1::CycB 1-266 in CG cells.  
100 Staging of larvae was performed at 25°C and brains were dissected in PBS at ALH0, ALH24,  
101 ALH48, ALH72 and ALH96. Brains were immediately fixed in 4 % formaldehyde diluted in  
102 PBS for 20 min, washed 3 times in PBS and mounted in Mowiol mounting medium on glass  
103 slides. Samples were imaged as described above and quantification of G1 (green), S (red)  
104 and G2/M CG nuclei was performed in Volocity.

105

### 106 **Multicolour clonal analyses (Raeppli)**

107 Heat-inducible Raeppli clones were generated by crossing *yw; UAS-Raeppli-CAAX 43E;*  
108 *cyp4g15-Gal4/TM6B* or *yw; UAS-Raeppli-nls 53D; cyp4g15-Gal4/TM6B* males to *hs-FLP*  
109 females. For knockdown experiments, chosen RNAi lines were crossed with *yw, hs-FLP;*  
110 *cyp-FRT-STOP-FRT-LexA/CyO; cyp4g15-GAL4, LexO-Raeppli-CAAX 43E*. Freshly  
111 hatched larvae (ALH0) were heat shocked for 2 hours at 37°C and aged to ALH24, ALH48,

112 ALH72 and ALH96 at 25°C, or at 29°C for RNAi experiments. For the visualization of clones  
113 at ALH0, constitutively expressed *Cyp-FLP* females were crossed to *yw; UAS-Raeppli-*  
114 *CAAX 43E; cyp4g15-Gal4/TM6B* males. Immunolabelling of NSCs for figure 1e was  
115 performed as described above. For all other experiments, CNS were dissected and fixed for  
116 20 min in 4% formaldehyde in PBS and washed three times in PBS before mounting. Images  
117 were acquired as described above using the spectral mode of a Zeiss LSM880 confocal to  
118 promote fluorophore separation.

119

### 120 **Quantification of clone volumes (Raeppli)**

121 Raeppli TFP1 clones were chosen for quantification as it is the strongest and sharpest of  
122 the four Raeppli fluorophores. Only clones in the ventral nerve cord were measured.  
123 Volumes were measured in 3D images using Volocity 6.3 (Quorum technologies).

124

### 125 **Quantification of clone overlap (Raeppli)**

126 Z stacks of Raeppli CAAX 53E clones induced in CG were visualized in Icy v2.1.4.0 (Institut  
127 Pasteur and France Bioimaging, license GPLv3). Boundaries of all one-colour clones, for  
128 each of the 4 possible, were mapped manually and outlined with polygons. The same was  
129 done in the rare case of full colour overlap. Partial overlaps between clones (defined as an  
130 overlap between the colours of adjacent clones that do not cover fully any of the two clones)  
131 were then counted manually, with their position recorded on the stack by drawing an ellipse.  
132 The clones were counted in the VNC only, stopping at the middle of the neuropile coming  
133 from the ventral side, as the great majority of NSCs are located ventrally.

134 The number of overlaps counted corresponds to the number of fusion events, that we then  
135 divided by the total number of clones to generate a “Number of events/clones”.

136

### 137 **Clonal analyses using CoinFLP**

138 The recently described Coin-FLP method<sup>57</sup> was used to generate red and green mosaics of  
139 CG cells. CoinFLP clones were generated by crossing *Cyp-FLP; CoinFLP* females to *yw;*  
140 *LexAop-mCherry; UAS-GFP* or *yw; LexAop-mCherry-mito; UAS-mito-GFP* males and  
141 maintained at 25°C. Larvae were staged to ALH48-ALH72 at 25°C. For fixed tissue  
142 analyses, brains were dissected and fixed for 20 min in 4% formaldehyde in PBS and  
143 washed three times in PBS before mounting. Images were acquired as described above.  
144 For live imaging and FLIP experiments (see below), CNS were dissected in Schneider’s  
145 medium and mounted as described for live imaging.

146

## 147 **Fluorescence loss in photobleaching (FLIP)**

148 FLIP experiments were performed in dissected larval brains mounted as described above  
149 for live imaging. Fluorescence in a selected region of interest (ROI) within a CG cell was  
150 repeatedly photobleached over time, and loss of fluorescence in nonbleached regions were  
151 monitored. Bleaching was performed on GFP expressed in CG using the *cyp4g15-GAL4*  
152 driver. Laser line 488 was used at 100%. Images were acquired as follows: one z-stack of  
153 5–10  $\mu\text{m}$  at 0.3-0.5  $\mu\text{m}$  intervals before bleaching (Pre-bleach), followed by 100 continuous  
154 acquisitions at the bleaching plane during the bleaching (Bleach) and one z-stack of 5–  
155 10  $\mu\text{m}$  at 0.3-0.5  $\mu\text{m}$  intervals after bleaching (Post-bleach). Images were subsequently  
156 analysed and processed using Fiji.

157

## 158 **Quantitative analysis of ploidy by fluorescence in situ hybridization (FISH) of** 159 **chromosomes**

160 The FISH protocol was performed as previously described (Gogendeau et al., 2015) using  
161 oligonucleotide probes for chromosomes II and III labelled with 5'CY3 and FAM488  
162 fluorescent dyes respectively (gift from R. Basto). FISH was performed in CNS expressing  
163 Histone::RFP or Histone::GFP in CG and dissected in PBS at ALH0, ALH24, ALH48, ALH72  
164 and ALH96. Briefly, dissected brains were fixed for 30 min in 4% formaldehyde prepared in  
165 PBS with 0.1% tween 20, washed three times/ 10min in PBS, washed once 10min in  
166 2xSSCT (2xSSC (Sigma S6639) + 0.1% tween-20) and once in 2xSSCT 50% formamide  
167 (Sigma 47671). For the pre-hybridization step, CNS were transferred to a new tube  
168 containing 2xSSCT 50% formamide pre-warmed at 92°C and denatured 3min at 92°C. For  
169 the hybridization step, the DNA probe (40-80 ng) was prepared in hybridization buffer (20%  
170 dextran sulphate, 2XSSCT, 50% deionized formamide (Sigma F9037), 0.5 mg ml<sup>-1</sup> salmon  
171 sperm DNA) and denatured 3min at 92°C. Probes were added to the brains samples and  
172 hybridize 5min at 92°C followed by overnight hybridization at 37°C. Samples were washed  
173 with 60°C pre-warmed 2XSSCT for 10 min, washed once 5min in 2XSSCT at RT and rinsed  
174 in PBS. CNS were mounted in Mowiol mounting medium and imaged as described above.  
175 FISH signals for chromosomes II and III were quantified in randomly selected CG nuclei  
176 using adapted protocols for dots inside objects detection in 3D images in Volocity.

177

## 178 **Statistics and reproducibility**

179 Statistical tests used for each experiment are stated in the figure legends. Statistical tests  
180 were performed using GraphPad Prism 7.0a.

181



## 1 **Acknowledgments**

2 We thank the Abmayr and Workman labs for the generous gift of the anti-Mbc and anti-Kirre  
3 antibodies; the Basto lab for the DNA FISH probes and the rabbit anti-Dpn; Steven Stowers  
4 and Matthias Landgraf for sharing plasmids for Multisite Gateway cloning; M'hamed Khalil  
5 Mazouni for the sequence of the FRT-STOP-FRT cassette; the Freeman lab for alrm-GAL4;  
6 James Skeath for the Dpn plasmid; the Bloomington Drosophila Stock Center and the  
7 Vienna Drosophila Research Center for RNAi lines. We are grateful to Mateusz Trylinski for  
8 help with Fiji scripts and discussions for ploidy count. Julie Marc generated part of Figure  
9 1e. Laurence Arbogast built the *cyp4g15-FLP* and *cyp4g15-FRT-STOP-FRT-LexA*  
10 constructs. We thank Romain Levayer for critical reading of the manuscript.

11 This work has been funded by a starting package from Institut Pasteur/LabEx Revive, a  
12 JCJC grant from Agence Nationale de la Recherche (NeuraSteNic, ANR- 17-CE13-0010-  
13 01) and a Projet Fondation ARC from Fondation ARC pour la Recherche sur le Cancer to  
14 PS. MAR has been supported by a LabEx Revive postdoctoral fellowship.

## 15 **Author Contributions**

16 MAR performed all experiments, except for: Figure 5a-c and Figure 3e performed by DB;  
17 Figure 3c-d, and Supp. Figure S1d-e performed by BD under the supervision of MAR; and  
18 parts of Figures 1e, 5 and 6 performed by PS. MAR, BD and PS quantified and analysed  
19 the data. MAR and PS wrote the article and MAR made the figures.

## 20 **Declaration of Interests**

21 The authors declare no competing interest.

## 22 **Data availability statement**

23 The datasets generated during and/or analysed during the current study are available from  
24 the corresponding author on reasonable request.

25

26

## 27 REFERENCES

- 28 1. Paridaen, J. T. M. L. & Huttner, W. B. Neurogenesis during development of the  
29 vertebrate central nervous system. **15**, 351–364 (2014).
- 30 2. Bond, A. M., Ming, G. L. & Song, H. Adult Mammalian Neural Stem Cells and  
31 Neurogenesis: Five Decades Later. *Cell Stem Cell* **17**, 385–395 (2015).
- 32 3. Götz, M., Nakafuku, M. & Petrik, D. Neurogenesis in the developing and adult  
33 brain—similarities and key differences. *Cold Spring Harb. Perspect. Biol.* **8**, (2016).
- 34 4. Martynoga, B. *et al.* Epigenomic enhancer annotation reveals a key role for NFIX in  
35 neural stem cell quiescence. *Genes Dev.* **27**, 1769–1786 (2013).
- 36 5. Faigle, R. & Song, H. Signaling mechanisms regulating adult neural stem cells and  
37 neurogenesis. *Biochim. Biophys. Acta* **1830**, 2435–48 (2013).
- 38 6. Stricker, S. H. & Götz, M. DNA-methylation: Master or slave of neural fate  
39 decisions? *Frontiers in Neuroscience* **12**, (2018).
- 40 7. Morante-Redolat, J. M. & Porlan, E. Neural Stem Cell Regulation by Adhesion  
41 Molecules Within the Subependymal Niche. (2019). doi:10.3389/fcell.2019.00102
- 42 8. Bjornsson, C. S., Apostolopoulou, M., Tian, Y. & Temple, S. It Takes a Village:  
43 Constructing the Neurogenic Niche. *Dev. Cell* **32**, 435–446 (2015).
- 44 9. Silva-Vargas, V., Crouch, E. E. & Doetsch, F. Adult neural stem cells and their niche:  
45 A dynamic duo during homeostasis, regeneration, and aging. *Curr. Opin. Neurobiol.*  
46 **23**, 935–942 (2013).
- 47 10. Conover, J. C. & Todd, K. L. *Neuronal Stem Cell Niches of the Brain. Biology and*  
48 *Engineering of Stem Cell Niches* (2017). doi:10.1016/B978-0-12-802734-9.00006-8
- 49 11. Obernier, K. & Alvarez-Buylla, A. Neural stem cells: Origin, heterogeneity and  
50 regulation in the adult mammalian brain. *Development (Cambridge)* **146**, (2019).
- 51 12. Lacar, B., Young, S. Z., Platel, J.-C. & Bordey, A. Gap junction-mediated calcium  
52 waves define communication networks among murine postnatal neural progenitor  
53 cells. *Eur. J. Neurosci.* **34**, 1895–905 (2011).
- 54 13. Platel, J. C. & Bordey, A. The multifaceted subventricular zone astrocyte: From a  
55 metabolic and pro-neurogenic role to acting as a neural stem cell. *Neuroscience*  
56 **323**, 20–28 (2016).
- 57 14. Conover, J. C. & Todd, K. L. Development and aging of a brain neural stem cell  
58 niche. *Exp. Gerontol.* **94**, 9–13 (2017).
- 59 15. Homem, C. C. F. & Knoblich, J. a. Drosophila neuroblasts: a model for stem cell  
60 biology. *Development* **139**, 4297–310 (2012).
- 61 16. Mira, H. & Morante, J. Neurogenesis From Embryo to Adult – Lessons From Flies  
62 and Mice. *Frontiers in Cell and Developmental Biology* **8**, 533 (2020).
- 63 17. Egger, B., Chell, J. M. & Brand, A. H. Insights into neural stem cell biology from flies.  
64 *Philos Trans R Soc L. B Biol Sci* **363**, 39–56 (2008).
- 65 18. Otsuki, L. & Brand, A. H. Cell cycle heterogeneity directs the timing of neural stem



- 66 cell activation from quiescence. *Science* **360**, 99–102 (2018).
- 67 19. Britton, J. S. & Edgar, B. A. Environmental control of the cell cycle in *Drosophila*:  
68 nutrition activates mitotic and endoreplicative cells by distinct mechanisms.  
69 *Development* **125**, 2149–2158 (1998).
- 70 20. Truman, J. W. & Bate, M. Spatial and temporal patterns of neurogenesis in the  
71 central nervous system of *Drosophila melanogaster*. *Dev. Biol.* **125**, 145–157 (1988).
- 72 21. Chell, J. M. & Brand, A. H. Nutrition-responsive glia control exit of neural stem cells  
73 from quiescence. *Cell* **143**, 1161–73 (2010).
- 74 22. Sousa-Nunes, R., Yee, L. L. & Gould, A. P. Fat cells reactivate quiescent  
75 neuroblasts via TOR and glial insulin relays in *Drosophila*. *Nature* **471**, 508–12  
76 (2011).
- 77 23. Spéder, P. & Brand, A. H. Gap Junction Proteins in the Blood-Brain Barrier Control  
78 Nutrient-Dependent Reactivation of *Drosophila* Neural Stem Cells. *Dev. Cell* 309–  
79 321 (2014). doi:10.1016/j.devcel.2014.05.021
- 80 24. Dumstrei, K., Wang, F. & Hartenstein, V. Role of DE-cadherin in neuroblast  
81 proliferation, neural morphogenesis, and axon tract formation in *Drosophila* larval  
82 brain development. *J. Neurosci.* **23**, 3325–35 (2003).
- 83 25. Peraanu, W., Shy, D. & Hartenstein, V. Morphogenesis and proliferation of the larval  
84 brain glia in *Drosophila*. *Dev. Biol.* **283**, 191–203 (2005).
- 85 26. Spéder, P. & Brand, A. H. Systemic and local cues drive neural stem cell niche  
86 remodelling during neurogenesis in *Drosophila*. *Elife* **7**, 1–16 (2018).
- 87 27. Bailey, A. P. *et al.* Antioxidant Role for Lipid Droplets in a Stem Cell Niche of  
88 *Drosophila*. *Cell* **163**, 340–353 (2015).
- 89 28. Cheng, L. Y. *et al.* Anaplastic lymphoma kinase spares organ growth during nutrient  
90 restriction in *Drosophila*. *Cell* **146**, 435–47 (2011).
- 91 29. Coutinho-Budd, J. C., Sheehan, A. E. & Freeman, M. R. The secreted neurotrophin  
92 spätzle 3 promotes glial morphogenesis and supports neuronal survival and  
93 function. *Genes Dev.* **31**, 2023–2038 (2017).
- 94 30. Read, R. D. Pvr receptor tyrosine kinase signaling promotes post-embryonic  
95 morphogenesis, and survival of glia and neural progenitor cells in *drosophila*. *Dev.*  
96 **145**, (2018).
- 97 31. Plazaola-Sasieta, H. *et al.* *Drosophila* CIC-a is required in glia of the stem cell niche  
98 for proper neurogenesis and wiring of neural circuits. *Glia* **67**, 2374–2398 (2019).
- 99 32. Yuan, X., Sipe, C. W., Suzawa, M., Bland, M. L. & Siegrist, S. E. Dilp-2-mediated  
100 PI3-kinase activation coordinates reactivation of quiescent neuroblasts with growth  
101 of their glial stem cell niche. *PLoS Biol.* **18**, (2020).
- 102 33. Kiyoshi, C. & Zhou, M. Astrocyte syncytium: a functional reticular system in the  
103 brain. *Neural Regen. Res.* **14**, 595 (2019).
- 104 34. Kanca, O., Caussin, E., Denes, A. S., Percival-Smith, A. & Affolter, M. Raeppli: a  
105 whole-tissue labeling tool for live imaging of *Drosophila* development. *Development*

- 106           **141**, 472–480 (2014).
- 107   35.   Fox, D. T. & Duronio, R. J. Endoreplication and polyploidy: insights into development  
108           and disease. *Development* **140**, 3–12 (2013).
- 109   36.   Edgar, B. A., Zielke, N. & Gutierrez, C. Endocycles : a recurrent evolutionary  
110           innovation for post-mitotic cell growth. (2014). doi:10.1038/nrm3756
- 111   37.   Orr-Weaver, T. L. When bigger is better: The role of polyploidy in organogenesis.  
112           *Trends Genet.* **31**, 307–315 (2015).
- 113   38.   Avet-Rochex, A., Kaul, A. K., Gatt, A. P., McNeill, H. & Bateman, J. M. Concerted  
114           control of gliogenesis by InR/TOR and FGF signalling in the *Drosophila* post-  
115           embryonic brain. *Development* **139**, 2763–72 (2012).
- 116   39.   Zielke, N. *et al.* Fly-FUCCI: A Versatile Tool for Studying Cell Proliferation in  
117           Complex Tissues. *Cell Rep.* **7**, 588–598 (2014).
- 118   40.   Piekny, A. J. & Maddox, A. S. The myriad roles of Anillin during cytokinesis.  
119           *Seminars in Cell and Developmental Biology* **21**, 881–891 (2010).
- 120   41.   Hu, C. K., Coughlin, M. & Mitchison, T. J. Midbody assembly and its regulation  
121           during cytokinesis. *Mol. Biol. Cell* **23**, 1024–1034 (2012).
- 122   42.   Gogendeau, D. *et al.* Aneuploidy causes premature differentiation of neural and  
123           intestinal stem cells. *Nat. Commun.* **6**, 1–15 (2015).
- 124   43.   Unhavaithaya, Y. & Orr-Weaver, T. L. Polyploidization of glia in neural development  
125           links tissue growth to blood-brain barrier integrity. *Genes Dev.* **26**, 31–6 (2012).
- 126   44.   Hong, A. *et al.* The cyclin-dependent kinase inhibitor Dacapo promotes replication  
127           licensing during *Drosophila* endocycles. *EMBO J.* **26**, 2071–2082 (2007).
- 128   45.   Frawley, L. E. & Orr-Weaver, T. L. Polyploidy. *Current Biology* **25**, R353–R358  
129           (2015).
- 130   46.   Øvrebø, J. I. & Edgar, B. A. Polyploidy in tissue homeostasis and regeneration.  
131           *Development (Cambridge)* **145**, (2018).
- 132   47.   Lippincott-Schwartz, J., Altan-Bonnet, N. & Patterson, G. H. Photobleaching and  
133           photoactivation: Following protein dynamics in living cells. *Nat. Rev. Mol. Cell Biol.* **4**,  
134           6–14 (2003).
- 135   48.   Miyawaki, A. Proteins on the move: Insights gained from fluorescent protein  
136           technologies. *Nat. Rev. Mol. Cell Biol.* **12**, 656–668 (2011).
- 137   49.   Peterman, E. & Prekeris, R. The postmitotic midbody: Regulating polarity, stemness,  
138           and proliferation. *Journal of Cell Biology* **218**, 3903–3911 (2019).
- 139   50.   Dittmar, T. & Zänker, K. S. Cell Fusion in Health and Disease. I Cell Fusion in  
140           Health. in *Advances in Experimental Medicine and Biology* (eds. Dittmar, T. &  
141           Zänker, K. S.) **713**, (Springer-Verlag, Berlin, Germany, 2011).
- 142   51.   Dittmar, T. & Zänker, K. S. Cell Fusion in Health and Disease. II Cell Fusion in  
143           Disease. in *Advances in Experimental Medicine and Biology* (eds. Dittmar, T. &  
144           Zänker, K. S.) (Springer-Verlag, Berlin, Germany, 2011).

- 145 52. Bastida-Ruiz, D., Van Hoesen, K. & Cohen, M. The dark side of cell fusion.  
146 *International Journal of Molecular Sciences* **17**, (2016).
- 147 53. Zito, F., Lampiasi, N., Kireev, I. & Russo, R. United we stand: Adhesion and  
148 molecular mechanisms driving cell fusion across species. *European Journal of Cell*  
149 *Biology* **95**, 552–562 (2016).
- 150 54. Brukman, N. G., Uygur, B., Podbilewicz, B. & Chernomordik, L. V. How cells fuse.  
151 *Journal of Cell Biology* **218**, 1436–1451 (2019).
- 152 55. Hernández, J. M. & Podbilewicz, B. The hallmarks of cell-cell fusion. *Development*  
153 **144**, 4481–4495 (2017).
- 154 56. Kim, J. H. & Chen, E. H. The fusogenic synapse at a glance. *Journal of cell science*  
155 **132**, (2019).
- 156 57. Bosch, J. A., Tran, N. H. & Hariharan, I. K. CoinFLP: a system for efficient mosaic  
157 screening and for visualizing clonal boundaries in *Drosophila*. *Development* **142**,  
158 597–606 (2015).
- 159 58. Abmayr, S. M. & Pavlath, G. K. Myoblast fusion: Lessons from flies and mice.  
160 *Development* **139**, 641–656 (2012).
- 161 59. Deng, S., Azevedo, M. & Baylies, M. Acting on identity: Myoblast fusion and the  
162 formation of the syncytial muscle fiber. *Seminars in Cell and Developmental Biology*  
163 **72**, 45–55 (2017).
- 164 60. Lee, D. M. & Chen, E. H. *Drosophila* Myoblast Fusion: Invasion and Resistance for  
165 the Ultimate Union. *Annual Review of Genetics* **53**, 67–91 (2019).
- 166 61. Haralalka, S. *et al.* Asymmetric Mbc, active Rac1 and F-actin foci in the  
167 fusioncompetent myoblasts during myoblast fusion in *Drosophila*. *Development* **138**,  
168 1551–1562 (2011).
- 169 62. Venken, K. J. T. *et al.* MiMIC: A highly versatile transposon insertion resource for  
170 engineering *Drosophila melanogaster* genes. *Nat. Methods* **8**, 737–747 (2011).
- 171 63. Nagarkar-Jaiswal, S. *et al.* A library of MiMICs allows tagging of genes and  
172 reversible, spatial and temporal knockdown of proteins in *Drosophila*. *Elife* **2015**, 1–  
173 28 (2015).
- 174 64. Bosch, J. A., Sumabat, T. M. & Hariharan, I. K. Persistence of RNAi-mediated  
175 knockdown in *Drosophila* complicates mosaic analysis yet enables highly sensitive  
176 lineage tracing. *Genetics* **203**, 109–118 (2016).
- 177 65. Evans, C. J. *et al.* G-TRACE: Rapid Gal4-based cell lineage analysis in *Drosophila*.  
178 *Nat. Methods* **6**, 603–605 (2009).
- 179 66. Zielke, N., Edgar, B. A. & DePamphilis, M. L. Endoreplication. *Cold Spring Harbor*  
180 *Perspectives in Biology* **5**, (2013).
- 181 67. Greenbaum, M. P., Iwamori, T., Buchold, G. M. & Matzuk, M. M. Germ cell  
182 intercellular bridges. *Cold Spring Harb. Perspect. Biol.* **3**, 1–18 (2011).
- 183 68. Huynh, J.-R. Fusome as a Cell-Cell Communication Channel of *Drosophila* Ovarian  
184 Cyst. (2013).

- 185 69. Willkomm, L. & Bloch, W. State of the art in cell-cell fusion. in *Cell Fusion: Overviews and Methods: Second Edition* **1313**, 1–19 (Springer New York, 2015).  
186
- 187 70. Acquistapace, A. *et al.* Human mesenchymal stem cells reprogram adult  
188 cardiomyocytes toward a progenitor-like state through partial cell fusion and  
189 mitochondria transfer. *Stem Cells* **29**, 812–824 (2011).
- 190 71. Ljubojevic, N., Henderson, J. M. & Zurzolo, C. The Ways of Actin: Why Tunneling  
191 Nanotubes Are Unique Cell Protrusions. *Trends in Cell Biology* **31**, 130–142 (2021).
- 192 72. Cordero Cervantes, D. & Zurzolo, C. Peering into tunneling nanotubes-The path  
193 forward. *EMBO J.* e105789 (2021). doi:10.15252/embj.2020105789
- 194 73. Peterson, N. G. *et al.* Cytoplasmic sharing through apical membrane remodeling.  
195 *Elife* **9**, 1–50 (2020).
- 196 74. Van De Peer, Y., Mizrachi, E. & Marchal, K. The evolutionary significance of  
197 polyploidy. *Nature Reviews Genetics* **18**, 411–424 (2017).
- 198 75. Giaume, C., Koulakoff, A., Roux, L., Holcman, D. & Rouach, N. Astroglial networks:  
199 a step further in neuroglial and gliovascular interactions. *Nat. Rev. Neurosci.* **11**, 87–  
200 99 (2010).
- 201 76. Kiyoshi, C. M. & Zhou, M. Astrocyte syncytium: A functional reticular system in the  
202 brain. *Neural Regeneration Research* **14**, 595–596 (2019).
- 203 77. Dias, M. C., Mapunda, J. A., Vladymyrov, M. & Engelhardt, B. Structure and  
204 junctional complexes of endothelial, epithelial and glial brain barriers. *International*  
205 *Journal of Molecular Sciences* **20**, 5372 (2019).
- 206 78. Giordano-Santini, R., Linton, C. & Hilliard, M. A. Cell-cell fusion in the nervous  
207 system: Alternative mechanisms of development, injury, and repair. *Seminars in Cell*  
208 *and Developmental Biology* **60**, 146–154 (2016).
- 209 79. Korenkova, O., Pepe, A. & Zurzolo, C. Fine intercellular connections in development:  
210 TNTs, cytonemes, or intercellular bridges? *Cell Stress* **4**, 30–43 (2020).
- 211 80. Doherty, J., Logan, M. a, Taşdemir, O. E. & Freeman, M. R. Ensheathing glia  
212 function as phagocytes in the adult Drosophila brain. *J. Neurosci.* **29**, 4768–81  
213 (2009).
- 214 81. Bellaïche, Y., Gho, M., Kaltschmidt, J. A., Brand, A. H. & Schweisguth, F. Frizzled  
215 regulates localization of cell-fate determinants and mitotic spindle rotation during  
216 asymmetric cell division. *Nat. Cell Biol.* **3**, 50–57 (2001).
- 217 82. Langevin, J. *et al.* Lethal giant larvae controls the localization of Notch-signaling  
218 regulators Numb, neuralized, and Sanpodo in Drosophila sensory-organ precursor  
219 cells. *Curr. Biol.* **15**, 955–962 (2005).
- 220 83. Pfeiffer, B. D. *et al.* Tools for neuroanatomy and neurogenetics in Drosophila. *Proc.*  
221 *Natl. Acad. Sci. U. S. A.* **105**, 9715–20 (2008).
- 222 84. Böttcher, R. *et al.* Efficient chromosomal gene modification with CRISPR/cas9 and  
223 PCR-based homologous recombination donors in cultured Drosophila cells. *Nucleic*  
224 *Acids Res.* **42**, (2014).

- 225 85. Petersen, L. K. & Stowers, R. S. A Gateway MultiSite recombination cloning toolkit.  
226 *PLoS One* **6**, e24531 (2011).

227

1 **Figure legends Rujano et al.**

2

3 **Figure 1: Growth of individual CG cells results in a tiled organization of the cortex**  
4 **glia network**

5 a) Schematic of the *Drosophila* NSC niche depicting the blood brain barrier (BBB), which is  
6 made by the perineurial glia (PG, red) and subperineurial glia (SPG, orange), the cortex glia  
7 (CG, green), neural stem cells (NSC, grey), ganglion mother cells/intermediate progenitors  
8 (gmc/inp, blue) and neurons (N, magenta).

9 b) Ventral region in the larval ventral nerve cord (VNC) at ALH72 (at 25°C) labelled with  
10 markers for the CG membranes (*Nrv2::GFP*, green), CG nuclei (*CG > Hist::RFP*, yellow),  
11 NSC (anti-Dpn, grey) and neurons (anti-ELAV, magenta). The right panel shows the CG  
12 membrane separately. Scale bar: 10 µm.

13 c) Timeline of neurogenesis (top scheme) and assessment of CG network organization  
14 during larval development in the entire CNS at ALH0, ALH24, ALH48, ALH72 and ALH96  
15 (at 25°C). Two main neurogenic regions are the central brain (CB), comprising two  
16 hemispheres, and the ventral nerve cord (VNC). CG membranes are labelled with  
17 *Nrv2::GFP* (ALH0, ALH72) and *CG>CD8::GFP* (ALH24, ALH48 and ALH96). Scale bar: 50  
18 µm.

19 d) Progressive growth and adaptation of the CG network to NSC lineages in the VNC  
20 visualized at ALH0, ALH24, ALH48, ALH72 and ALH96 (at 25°C). CG membranes are  
21 labelled with *CG>CD8::GFP* (ALH0) and *Nrv2::GFP* (ALH24, ALH48, ALH72 and ALH96).  
22 NSCs are labelled with Dpn (grey). Scale bars: 20 µm.

23 e) Analysis of individual CG growth over time by multicolour lineage tracing using Raeppli.  
24 Images were acquired at ALH0, ALH24, ALH48, ALH72 and ALH96 (at 25°C). Constitutively  
25 expressed Cyp-Flp was used for the visualization of clones at ALH0. Hs-Flp and heat shock  
26 induction at 37°C at ALH0 was used for the visualization of clones at ALH24, ALH48, ALH72  
27 and ALH96. Scale bars: 20 µm.

28 f) Volume quantification of Raeppli clones in the VNC at ALH0 (n=7), ALH24 (n=25), ALH48  
29 (n=25), ALH72 (n=32) and ALH96 (n=30). n, number of clones. Results are presented as  
30 box and whisker plots. Whiskers mark the minimum and maximum, the box includes the  
31 25th–75th percentile, and the line in the box is the median. Individual values are  
32 superimposed. Data statistics: ordinary one-way ANOVA with a Tukey's multiple  
33 comparison test.



34 g) Individual TagBFP (cyan) and E2-orange (yellow) Raeppli clones encasing several NSC  
35 labelled with Dpn (magenta). Scale bar: 20  $\mu\text{m}$ .

36 h) Number of NSCs per CG clone quantification in the central brain (CB) and the VNC at  
37 ALH48 (n=53 and 51 CB and VNC, respectively), ALH72 (n=64 and 48 CB and VNC,  
38 respectively) and ALH96 (n=46 and 42 CB and VNC, respectively). n, number of clones.  
39 Bars represent the mean and the error bars are the standard deviation. Data statistics: two-  
40 way ANOVA with a Dunnett's multiple comparison test.

41

## 42 **Figure 2: CG cells exhibit multiple cell cycle strategies**

43 a) G1 (green), S (magenta) and G2/M (grey) phases of the cell cycle along CG network  
44 detected with Fly-FUCCI. FUCCI sensors are labelled in magenta (CycB) and green (E2F1).  
45 Scale bar: 50  $\mu\text{m}$ .

46 b) Quantification of cell cycle phase distribution in CG by Fly-FUCCI at ALH0 (n=11), ALH24  
47 (n=15), ALH48 (n=23), ALH72 (n=13) and ALH96 (n=6) (at 25°C). n, number of CNS  
48 analysed. Stacked bars represent the percentage of cells in each phase.

49 c) Representative image of a larval VNC expressing Hist::RFP in CG (magenta) and stained  
50 with phospho-histone H3 antibody (pHistone-3, green) to visualise mitotic CG nuclei (grey).  
51 Scale bar: 20  $\mu\text{m}$ . Higher magnification of separate channels from the region inside the  
52 dashed rectangle are shown on the right.

53 d) CG mitotic index quantification in larval CNS at ALH0 (n=15), ALH24 (n=26), ALH48  
54 (n=27), ALH72 (n=13) and ALH96 (n=13) (at 25°C). n, number of CNS analysed. Results  
55 are presented as box and whisker plots. Whiskers mark the minimum and maximum, the  
56 box includes the 25th–75th percentile, and the line in the box is the median. Individual values  
57 are superimposed. Data statistics: ordinary one-way ANOVA with a Tukey's multiple  
58 comparison test.

59 e) Still images of a time-lapse movie (Movie S1) of mitotic CG expressing *Hist::RFP* (grey).  
60 Scale bar: 5  $\mu\text{m}$ .

61 f) Expression of *mRFP::scra* (magenta) in CG to monitor contractile ring and midbody  
62 formation. CG membranes and nuclei are labelled with *Nrv2::GFP* (green) and *Hist::IFP*  
63 (blue) respectively. Arrows indicate midbodies/contractile ring. Scale bar: 10  $\mu\text{m}$ . Higher  
64 magnifications of *mRFP::scra* and *Nrv2::GFP* separate channels from the region  
65 demarcated by the dashed rectangle are shown on the right.

66 g) Quantification of the number of midbodies per 100 CG cells in larval VNCs at ALH24  
67 (n=4), ALH48 (n=8), ALH72 (n=4) and ALH96 (n=4) (at 25°C). n, number of VNCs analysed.

68 Results are presented as box and whisker plots. Whiskers mark the minimum and maximum,  
69 the box includes the 25th–75th percentile, and the line in the box is the median. Individual  
70 values are superimposed. Data statistics: ordinary one-way ANOVA with a Tukey’s multiple  
71 comparison test.

72 h) Fluorescence in situ hybridization (FISH) using probes for chromosomes 2 (Chr2, cyan)  
73 and 3 (Chr3, red) in CNS expressing *nls::LacZ* (yellow) to mark the CG nuclei. 2n (upper)  
74 and >2n (bottom) nuclei are shown. Scale bar: 5  $\mu\text{m}$ .

75 i) Quantification of FISH signals in CG nuclei at ALH0 (n=95), ALH24 (n=189), ALH48  
76 (n=140), ALH72 (n=70) and ALH96 (n=108). N, number of CG cells analysed. Results are  
77 presented as box and whisker plots. Whiskers mark the minimum and maximum, the box  
78 includes the 25th–75th percentile, and the line in the box is the median. Individual values  
79 are superimposed. Data statistics: two-way ANOVA with a Dunnett’s multiple comparison  
80 test.

81 j, k) CG nuclei (j, *CG > Hist::RFP*) and CG network (k, *Nrv2::GFP*) in control CNS and in  
82 CNS where CG-specific downregulation of doubled-parked (*dup RNAi*) was induced. Scale  
83 bar: 20  $\mu\text{m}$ .

84 l) Still images of a time-lapse movie (Movie S3) of a CG expressing *Hist::RFP* (grey)  
85 undergoing endomitosis. Scale bar: 5  $\mu\text{m}$ .

86

### 87 **Figure 3: CG glia are syncytial units**

88 a) Still images of a time-lapse movie (Movie S4) of two CG expressing *Hist::RFP* (grey)  
89 undergoing mitosis synchronously. Scale bar: 5  $\mu\text{m}$ .

90 b) Synchronous behaviour of CG observed with Fly-FUCCI (left panels), where clusters of  
91 CG are found at the same cell cycle phase, and with anillin staining that also show clusters  
92 of CG undergoing mitosis (\*) and cytokinesis (\*\*) at the same time (right panels).  
93 Synchronous clusters are delineated with dashed lines. FUCCI sensors are labelled in  
94 magenta (CycB) and green (E2F1). Anillin is labelled with mRFP::*scra* (magenta) and CG  
95 nuclei with *Hist::IFP* (blue). Separate channels are shown in the bottom. Scale bars: 20  $\mu\text{m}$ .

96 c) Sharing of cytoplasmic material between CG assessed by Fluorescence Loss In  
97 Photobleaching (FLIP) of cytosolic GFP (green). Top panels depict a region in the VNC  
98 before (pre-bleach) and after bleaching (post-bleach). CG nuclei are labelled with *Hist::RFP*  
99 (magenta). Bottom panels show intermediate time points (GFP only, pseudocolored with  
100 thermal LUT) during continuous photobleaching. Bleached area is delineated by the dashed  
101 square. Scale bars: 20  $\mu\text{m}$ .



102 d) Quantification of the number of CG nuclei in the bleached region after FLIP at ALH24  
103 (n=23), ALH48 (n=16), ALH72 (n=8) and ALH96 (n=8). n, number of FLIP experiments  
104 analysed. Results are presented as box and whisker plots. Whiskers mark the minimum and  
105 maximum, the box includes the 25th–75th percentile, and the line in the box is the median.  
106 Individual values are superimposed. Data statistics: two-way ANOVA with a Dunnett's  
107 multiple comparison test.

108 e) CG connection via the midbodies marked by anillin (mRFP::scra, magenta) assessed by  
109 FLIP of cytosolic GFP (green). Top panels depict a region in the VNC before (pre-bleach)  
110 and after bleaching (post-bleach). CG nuclei are labelled with *Hist::RFP* (magenta). The  
111 bleached area delineated by the white dashed square is placed close to an isolated midbody  
112 (clear blue inset) in between CG cells. Bottom panels show intermediate time points (GFP  
113 only, pseudocolored with thermal LUT) during continuous photobleaching. Scale bars: 10  
114  $\mu\text{m}$ .

115

#### 116 **Figure 4: CG units can undergo cellular fusion**

117 a) Restricted areas of colour overlapping in membrane targeted CG Raeppli clones at  
118 ALH72 (dashed lines). Scale bar: 50  $\mu\text{m}$ .

119 b) Cytoplasmic exchange between CG units assessed in CoinFLP clones (methods and  
120 Supp. Fig. S4c). Clones expressing either cytosolic GFP (green) or cytosolic RFP  
121 (magenta), show regions of partial overlapping (dashed lines). Scale bar: 20  $\mu\text{m}$ .

122 c) Quantification of areas of partial (grey-hashed green), total (grey) or no overlap (green)  
123 between clones expressing cytosolic GFP and RFP. Due to the bias in the CoinFLP system  
124 that generates very large connected clones in one colour (RFP in our case) and small sparse  
125 clones in the other colour (GFP), only green clones were taken in account for the no overlap  
126 category. Stacked bars represent the mean and error bars represent the SEM. Data  
127 statistics: two-way ANOVA with a Šídák's multiple comparisons test. No statistically  
128 significant differences were found.

129 d) Propagation of information/signals between fused areas was assessed by FLIP in clones  
130 generated by CoinFLP with cytosolic GFP (green) and RFP (magenta) in CG. A GFP  
131 expressing clone with areas of partial and no overlap with an RFP expressing clone was  
132 selected. Continuous bleaching was performed in a small area (dashed rectangle) of the  
133 non-overlapping zone, and loss of fluorescence was assessed in the overlapping area (grey,  
134 delineated by a dashed line). Top panels depict the assessed area before (pre-bleach) and

135 after bleaching (post-bleach). Bottom panels show intermediate time points (GFP only,  
136 pseudocolored with thermal LUT) during continuous photobleaching. Scale bars: 10  $\mu$ m.  
137 e) Continuity between CG units due to cellular fusion was assessed by FLIP of CG  
138 expressing cytosolic GFP in combination with early induction of multicolour labelling of CG  
139 nuclei (Raeppli-NLS) that leads to clonal labelling of the nuclei in CG units. Continuous  
140 bleaching was performed in a small area (dashed rectangle) containing nuclei of one colour.  
141 Top panels depict the assessed area before (pre-bleach) and after bleaching (post-bleach).  
142 Bottom panels show intermediate time points (GFP only, pseudocolored with thermal LUT)  
143 during continuous photobleaching. Scale bars: 20  $\mu$ m.  
144 f) Still images of a time-lapse movie (Movie S5) of the region of interaction between two  
145 neighbouring CG clones generated with CoinFLP and expressing either cytosolic GFP or  
146 RFP. Scale bar: 5  $\mu$ m.

147

#### 148 **Figure 5: Cell fusion between CG units is regulated by canonical fusion molecules**

149 a) Expression of membrane targeted GFP (*mCD8::GFP*, green) and nuclear RFP  
150 (*Hist::RFP*, magenta) using the trojan line *mbc-Gal4* to assess the expression of *mbc* in CG.  
151 Glia nuclei were labelled with Repo (blue) and NSC were labelled with Dpn (gray). Scale  
152 bar: 20  $\mu$ m.

153 b) Endogenous expression of Mbc in the CNS assessed by immunostaining with Mbc  
154 antibody (magenta) in the VNC. CG membranes are labelled with *Nvr2::GFP* (green), NSC  
155 are labelled with Dpn (grey) and Dapi (blue) was used to visualise all nuclei. Upper panels  
156 show the expression in control CNS. Lower panels show the expression after RNAi  
157 knockdown of *mbc*. Scale bar: 10  $\mu$ m.

158 c) Endogenous expression of Kirre in the CNS assessed by immunostaining with Kirre  
159 antibody (magenta) in the VNC. CG membranes are labelled with *Nvr2::GFP* (green), NSC  
160 are labelled with Dpn (grey) and Dapi (blue) was used to visualise all nuclei. Upper panels  
161 show the expression in control CNS. Lower panels show the expression after RNAi mediated  
162 down regulation of *kirre*. Scale bar: 10  $\mu$ m.

163 d) RNAi knockdown of cell-cell fusion related genes in multicoloured labelled CG (Raeppli  
164 CAAX) in the VNC. Control (no RNAi), *WASp*, *mbc*, *hbs*, *rst* and *sns* RNAi-knockdowns are  
165 shown. RNAi expression was induced at ALH0, larvae were maintained at 29°C and  
166 dissected at ALH72. Scale bars: 50  $\mu$ m.

167 e, f) Quantification of the number of fusion events per clone (e) and number of clones (f) for  
168 multicoloured labelled Raeppli CG clones at ALH72 (at 29°C) after knockdown of fusion

169 genes in CG. Results are presented as box and whisker plots. Whiskers mark the minimum  
170 and maximum, the box includes the 25th–75th percentile. Individual values are  
171 superimposed. Data statistics: one-way ANOVA with a Kruskal–Wallis multiple comparison  
172 test.

173

174 **Figure 6: Cellular fusion of CG units is required for correct CG architecture**

175 a) Effect of down regulation of cell-cell fusion genes on CG network architecture. RNAi  
176 knockdown of *WASp*, *mbc*, *dock*, *kirre* and *sns* at ALH72 (at 29°C) are shown. CG network  
177 architecture is visualised with *Nrv2::GFP*. Yellow arrows point towards noticeable defects in  
178 the network architecture. Scale bars: 10 µm.

179 b) Model of CG morphogenesis along developmental time and NSC behaviour. Individual  
180 CG cells grow to tile the CNS, undergoing both endoreplicative and mitotic events that create  
181 multinucleated and polyploid cells. These syncytial units are also able to fuse with each  
182 other, exchanging subcellular compartments including cytoplasm, membrane and  
183 organelles. This fusion appears partial and can lead to sharp boundaries between  
184 connected and unconnected CG domains, as illustrated by the dashed lines. Each CG unit  
185 is able to enwrap several NSC lineages. Polyploid nuclei are shown in darker blue.

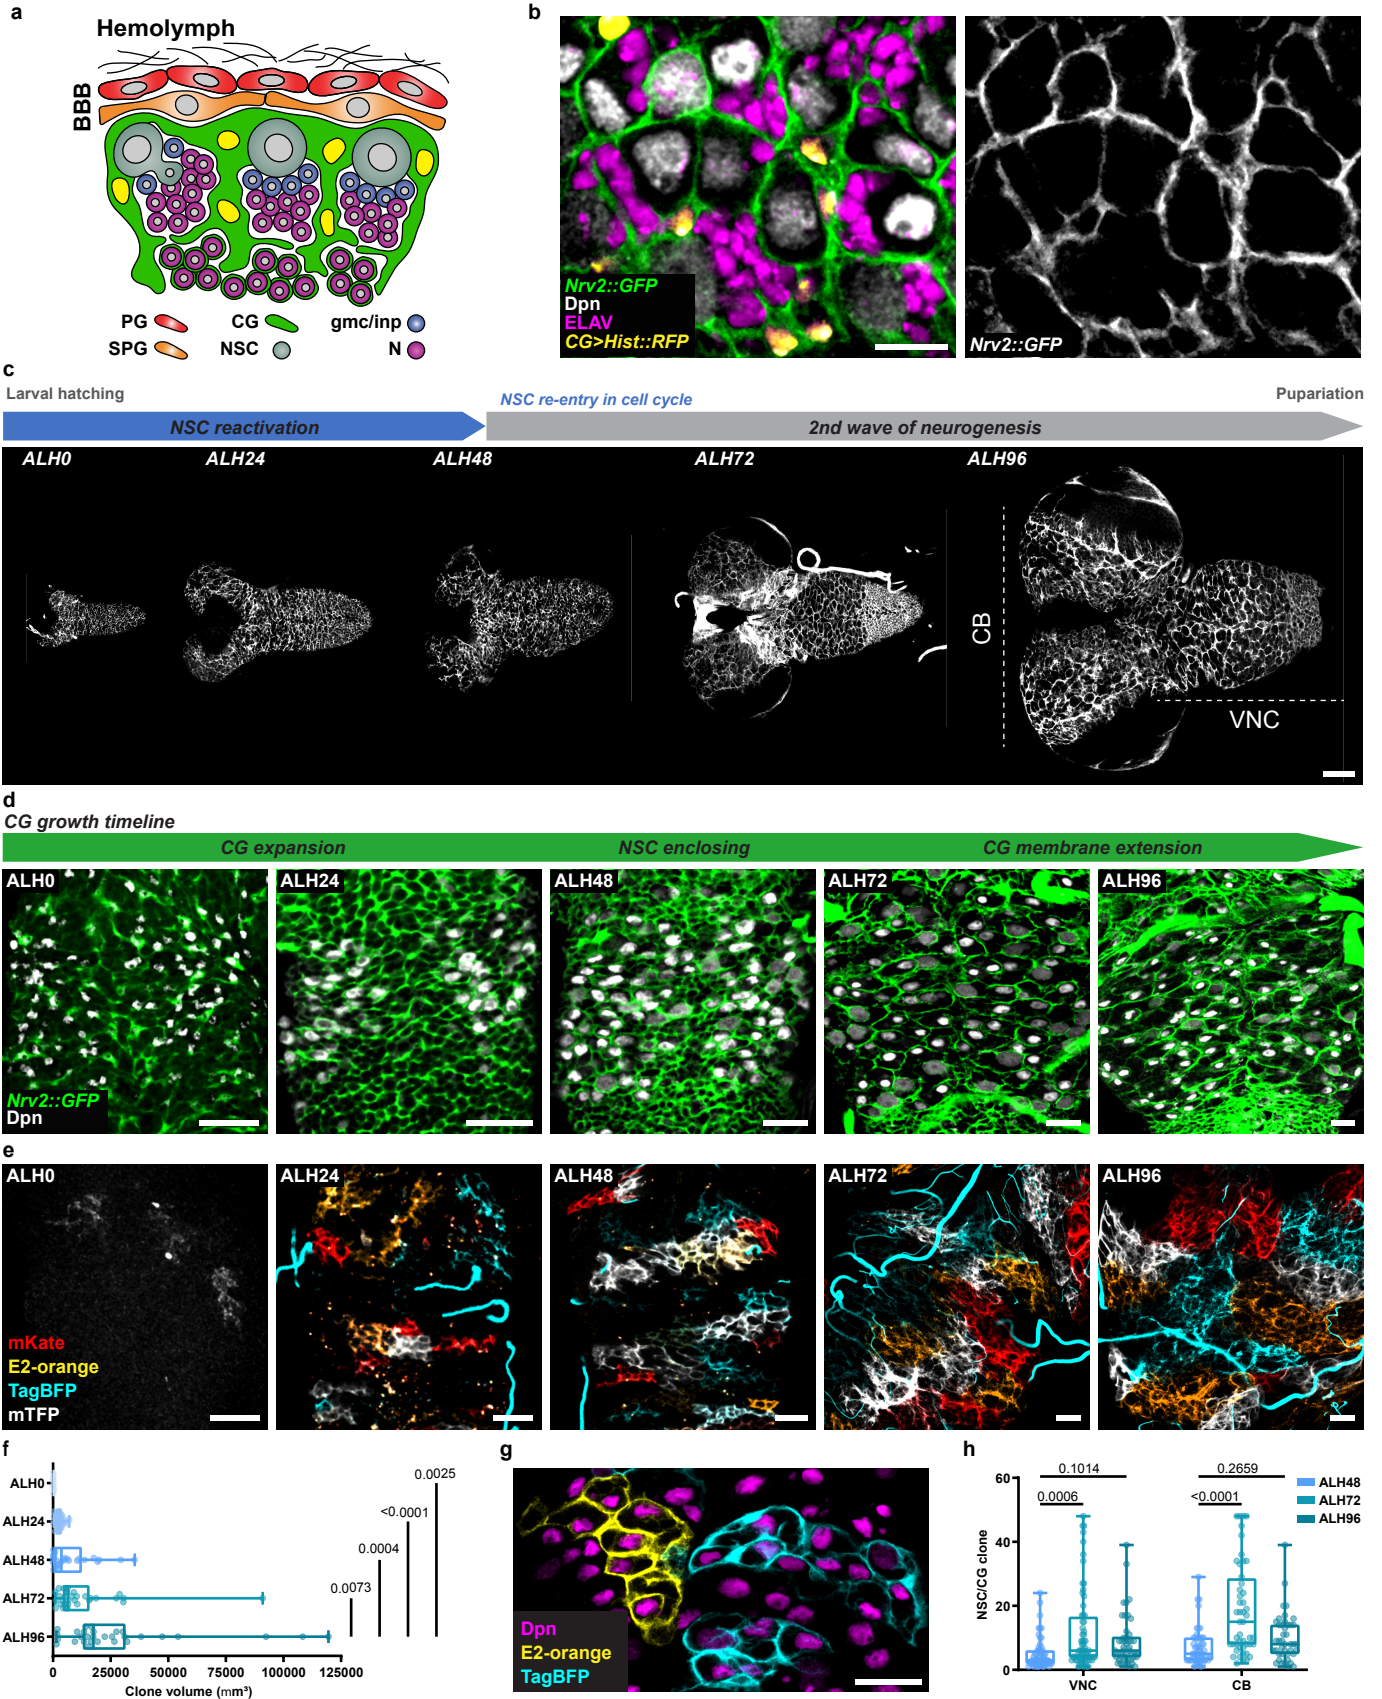



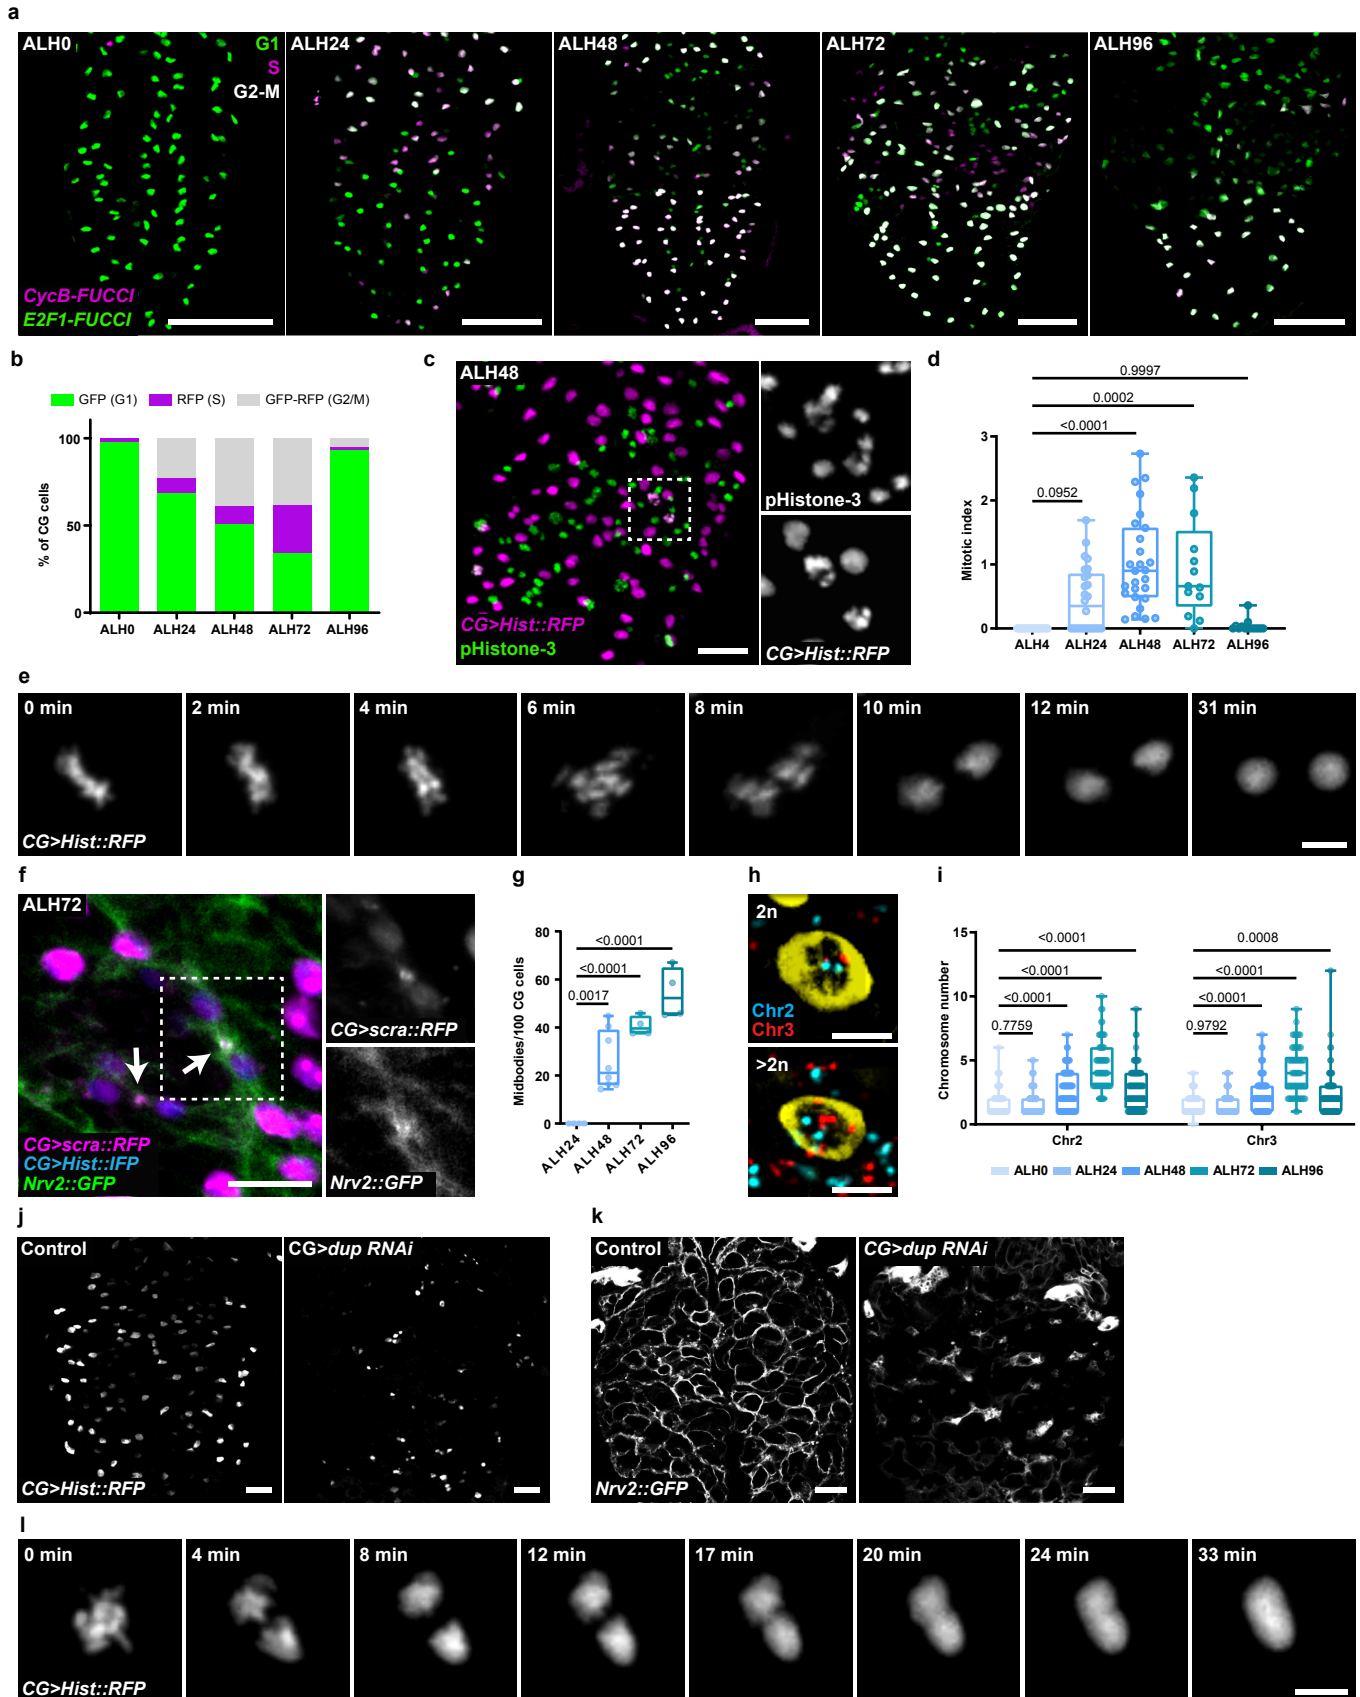

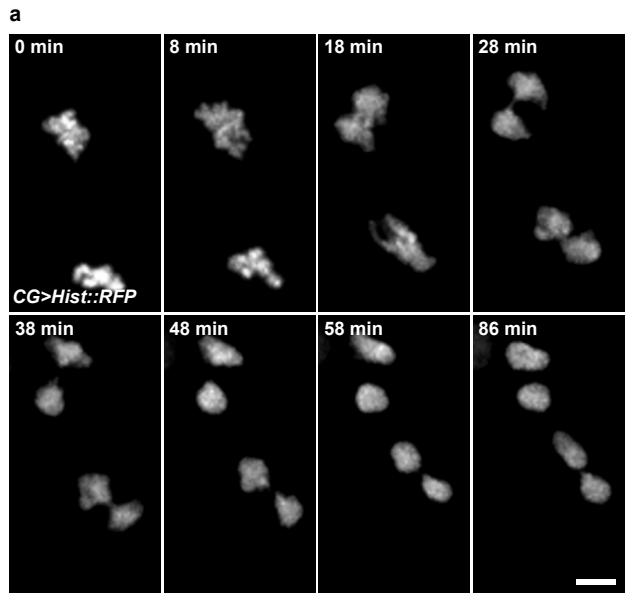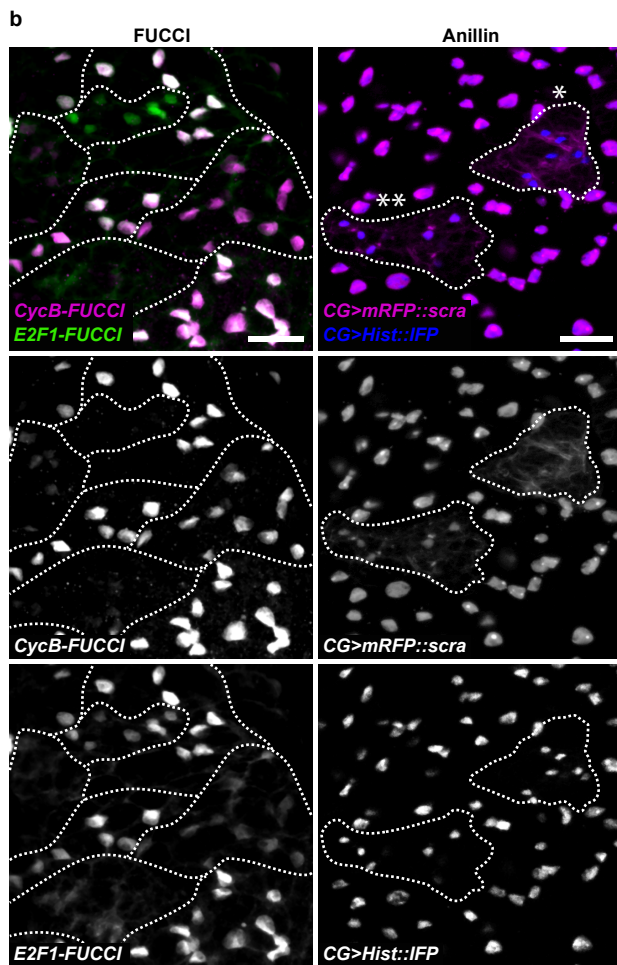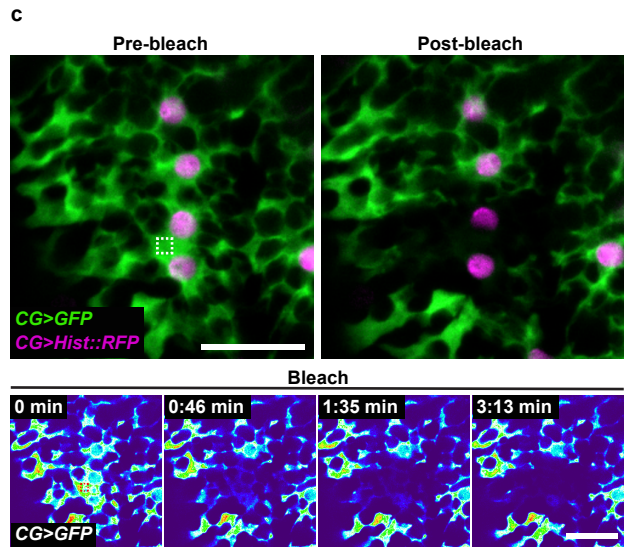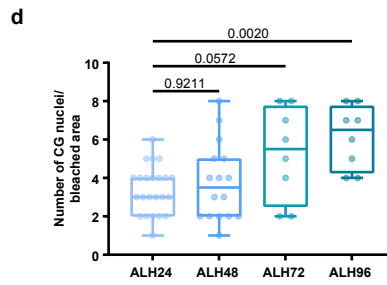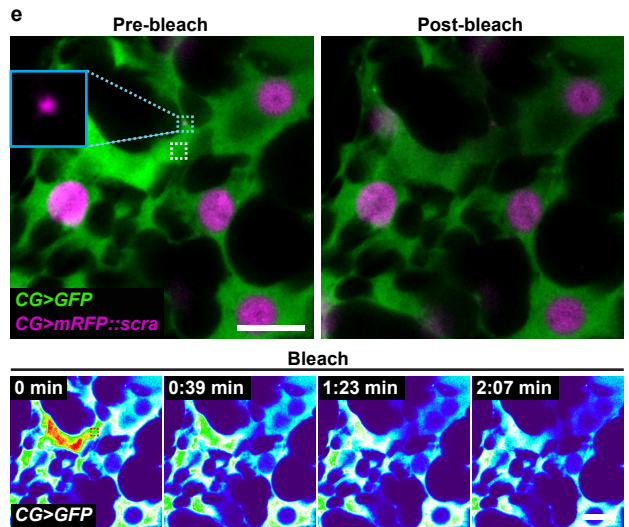



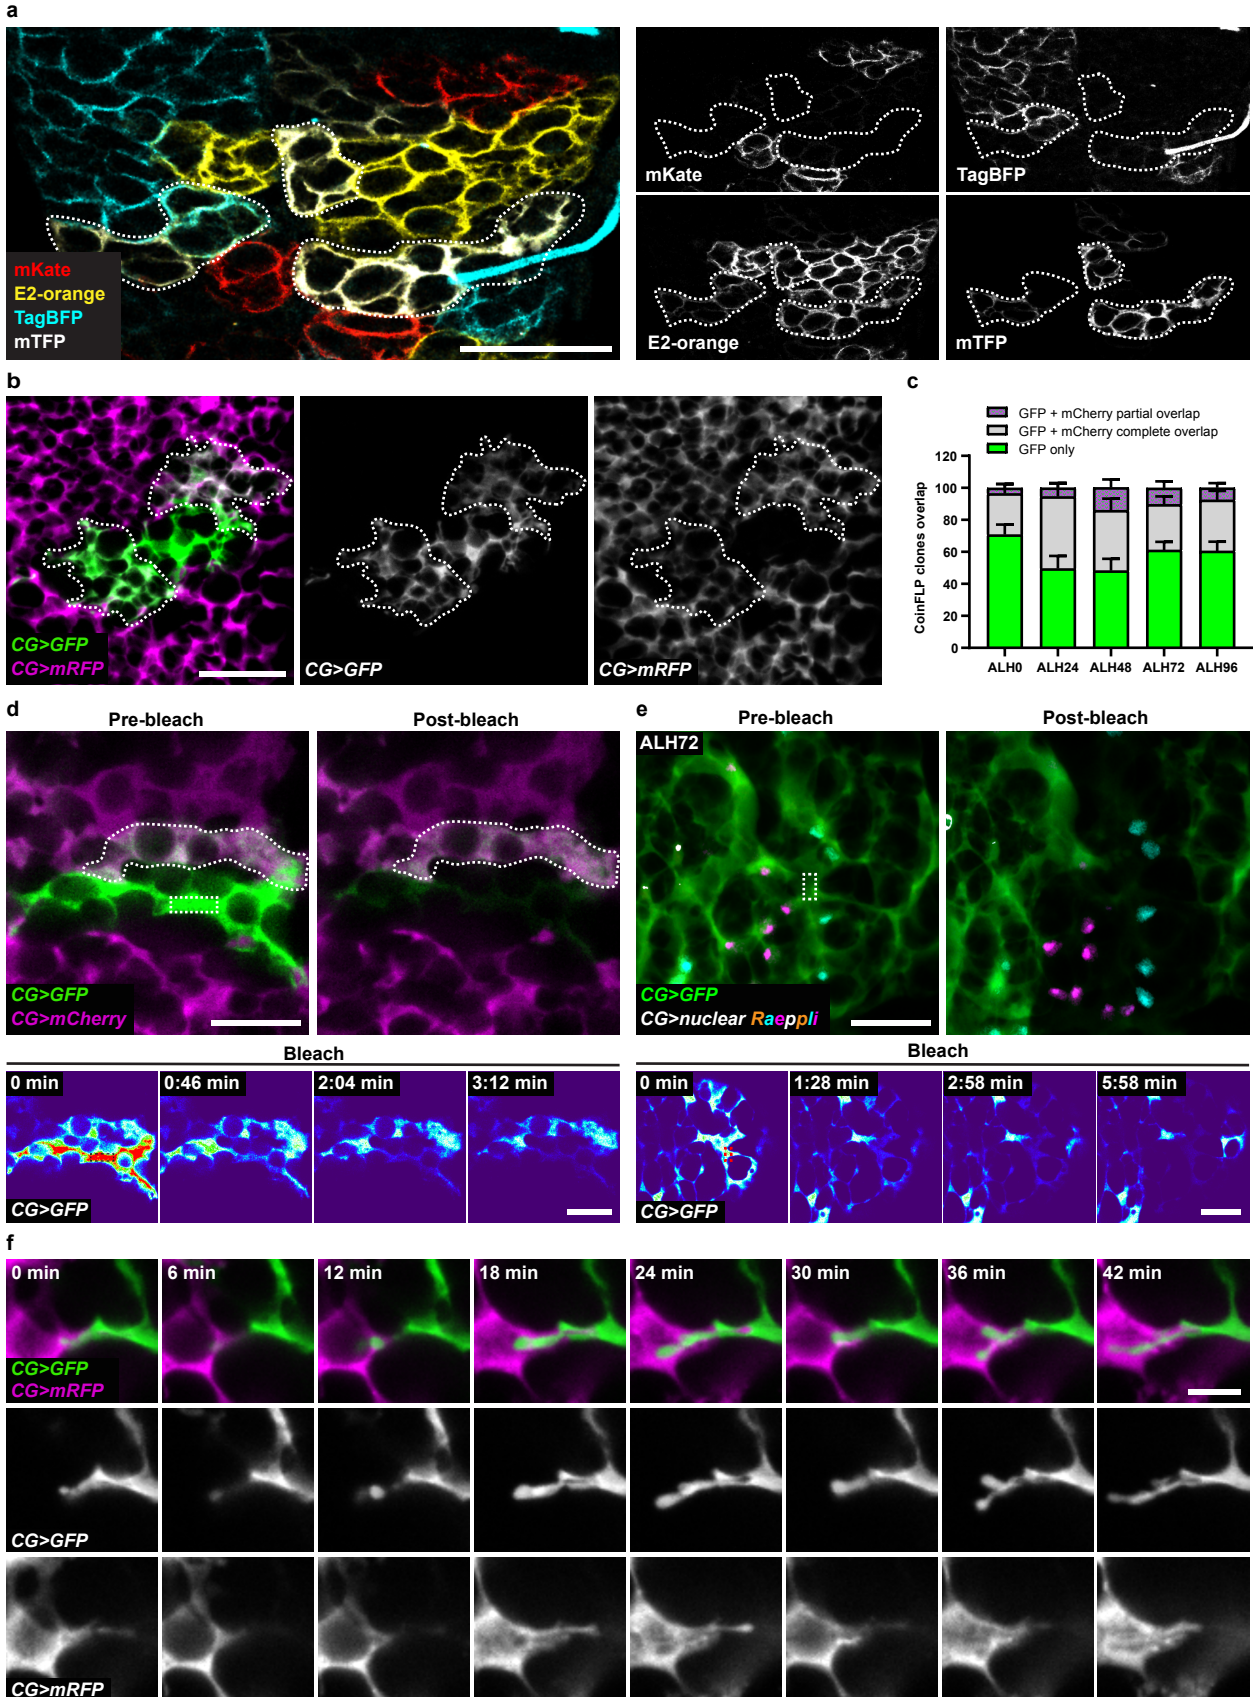

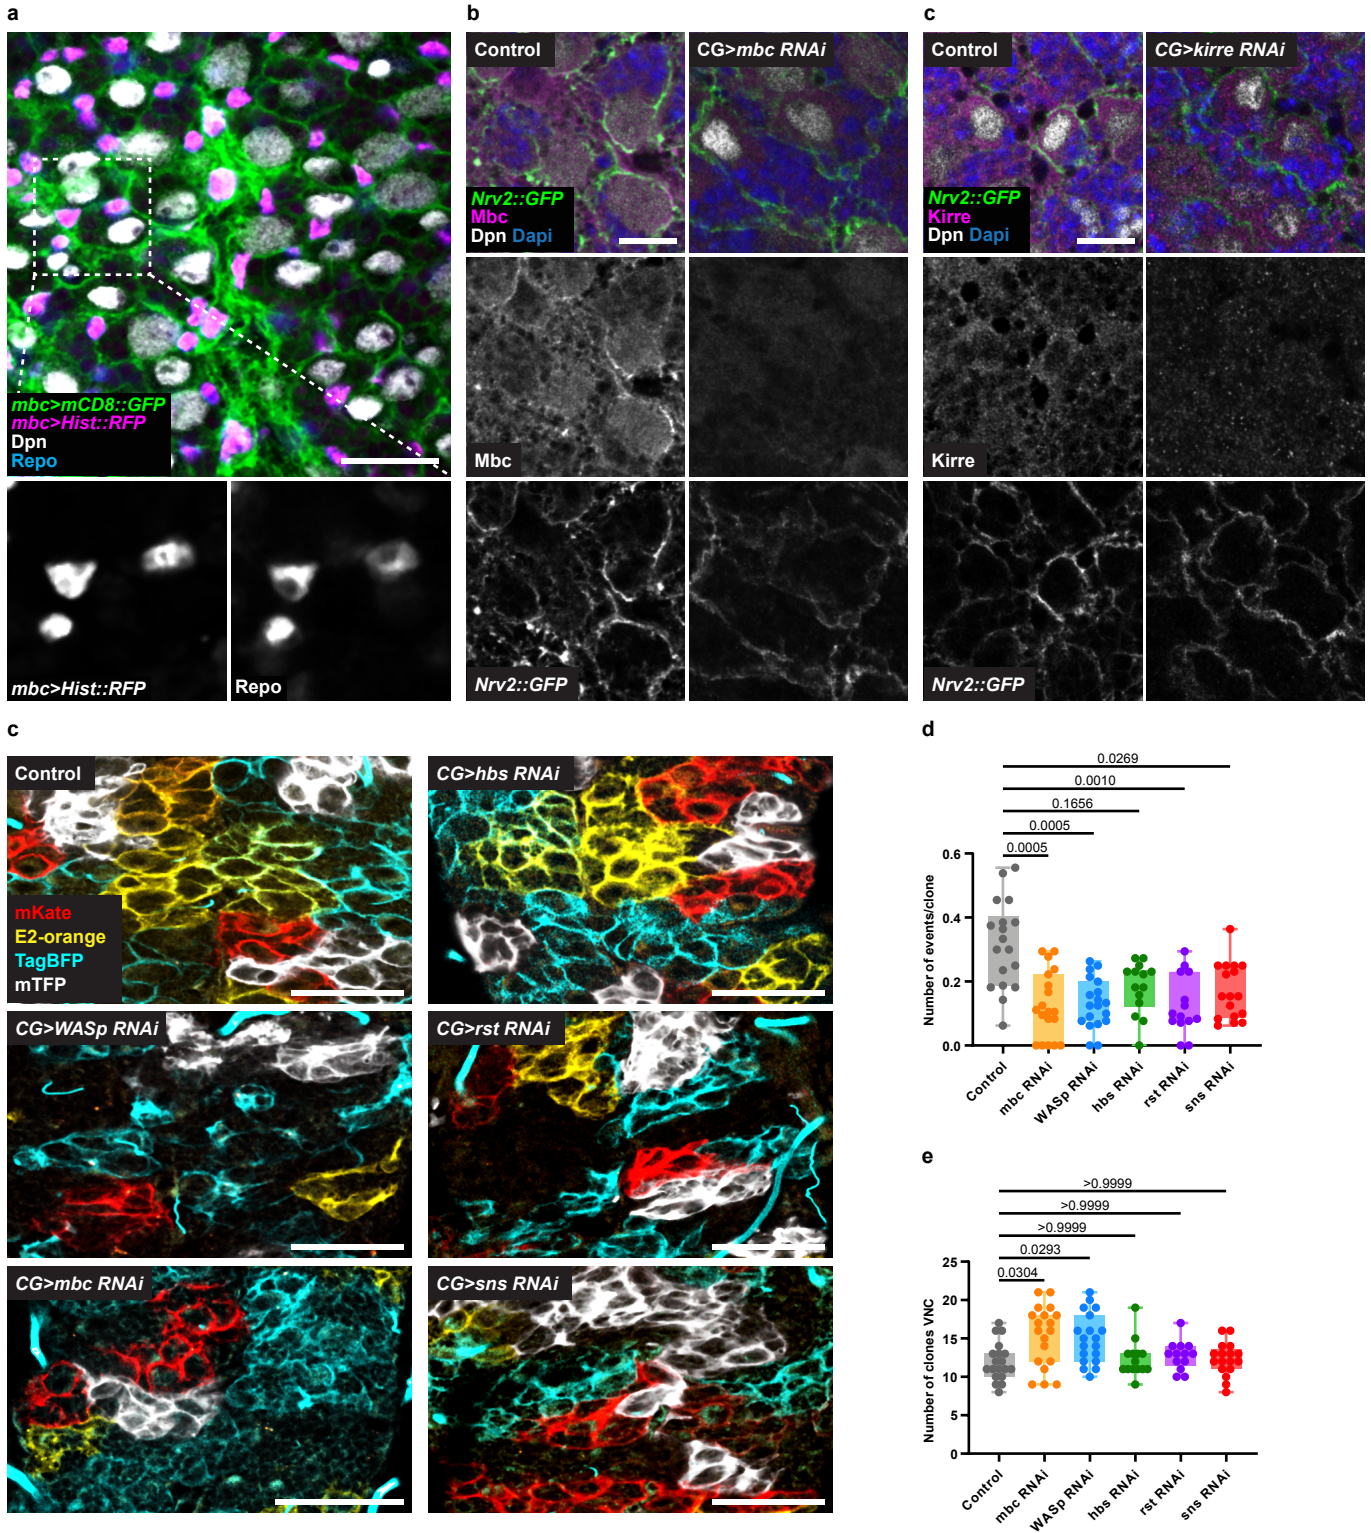



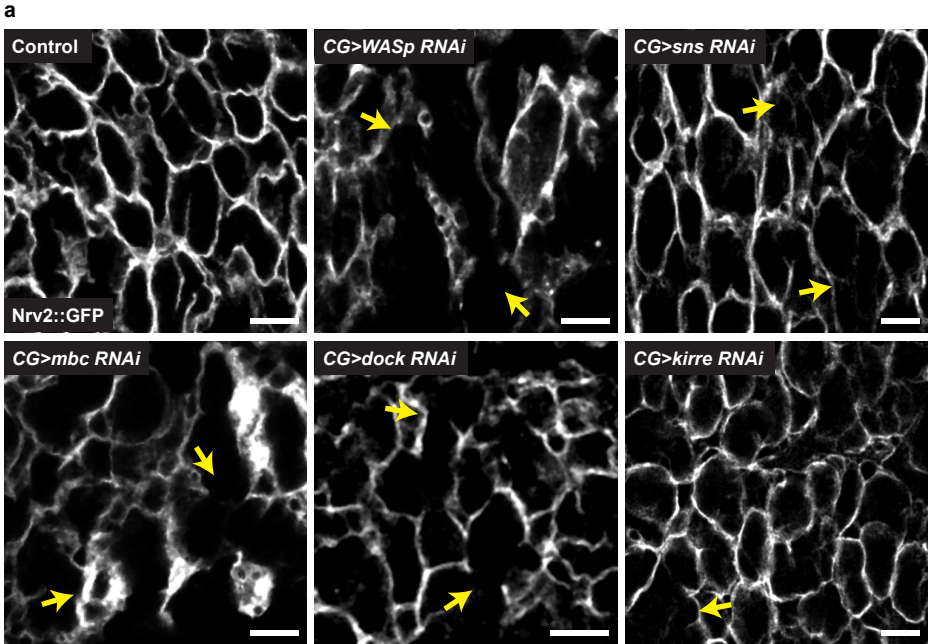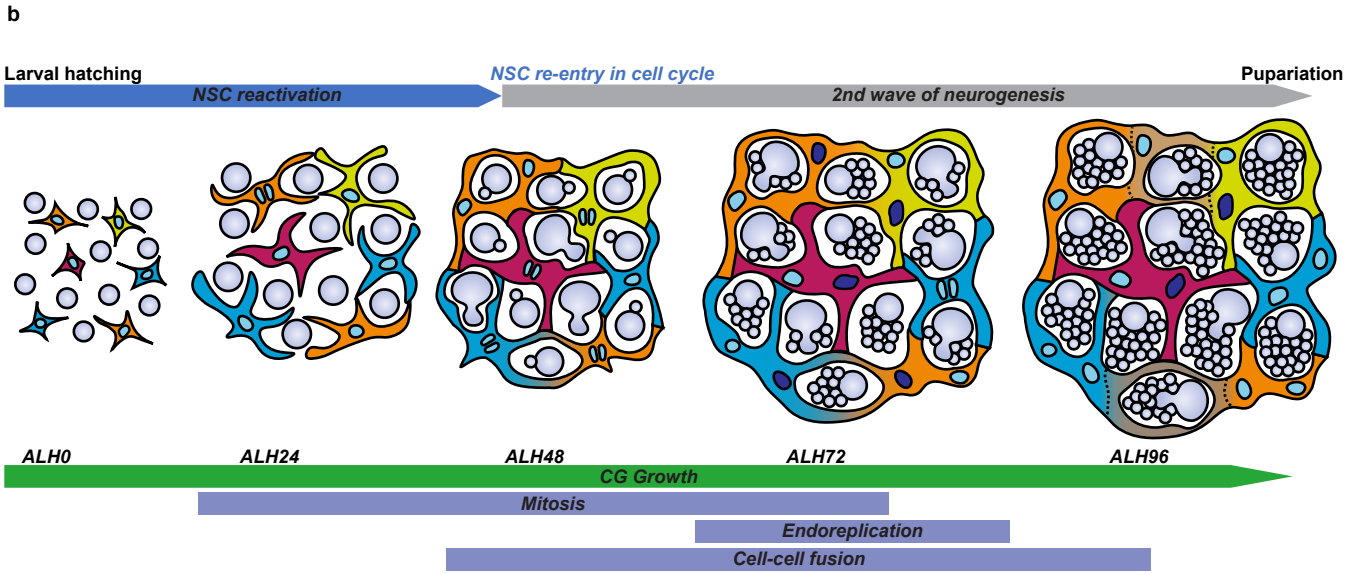

Source: https://www.biorxiv.org/content/10.1101/2021.05.09.443326v1.full.pdf
